# Supplementary material for: Genetic associations between circulating immune cells and periodontitis highlight the prospect of systemic immunoregulation in periodontal care
Source: eLife. 2024 Mar 27;12:RP92895. doi: 10.7554/eLife.92895 (PMC10972561; doi:10.7554/eLife.92895)
Supplement: Supplementary file 1. — Characteristics of the single-nucleotide polymorphisms (SNPs) used as instrumental variables (IVs) in the Mendelian randomization (MR). Effect estimates of causal associations between circulating immune cells and periodontitis risk. The heterogeneity and horizontal pleiotropy of the main results using Cochran’s Q-statistics and MR-Egger intercept. Effect estimates of causal associations after excluding outliers in RadialMR for two features with considerable heterogeneity. Effect estimates of causal associations after excluding influential or outlier SNPs for significant results. Effect estimates of causal associations between circulating immune cells and chronic periodontitis, chronic gingivitis, and gingival hyperplasia in subgroup analysis. Effect estimates of the reverse associations between periodontitis and circulating immune cells. Effect estimates of causal associations after mutual and covariate correction in multivariable Mendelian randomization (MVMR). Ranking of models according to their posterior probability (PP) using Mendelian randomization-Bayesian model averaging (MR-BMA) analysis. Results of transcriptome-wide association study (TWAS), conditional analysis, permutation testing, and colocalization analysis on neutrophil, natural killer T cell, plasmacytoid dendritic cell (DC), and periodontitis. [file elife-92895-supp1.xlsx]

## Sheet: Legends
Supplementary Tables for
Genetic associations between circulating immune cells and periodontitis highlight the prospect of systemic immunoregulation in periodontal care
Xinjian Ye, Yijing Bai, Mengjun Li, Yuhang Ye, Yitong Chen, Bin Liu, Yuwei Dai, Shan Wang, Weiyi Pan, Zhiyong Wang, Yingying Mao & Qianming Chen
Supplementary Tables
Table of Contents
Table s1. Case definition and exclusion criteria in included GWASs.
Table s2. Characteristics of the SNPs used as IVs in the MR.
Table s3. Effect estimates of causal associations between circulating immune cells and periodontitis risk.
Table s4. The heterogeneity and horizontal pleiotropy of the main results using Cochran's Q statistics and MR-Egger intercept.
Table s5. Effect estimates of causal associations after excluding outliers in RadialMR for two features with considerable heterogeneity.
Table s6. Effect estimates of causal associations after excluding influential or outlier SNPs for significant results.
Table s7-9. Effect estimates of causal associations between circulating immune cells and chronic periodontitis, chronic gingivitis, and gingival hyperplasia in subgroup analysis.
Table s10. Effect estimates of the reverse associations between periodontitis and circulating immune cells.
Table s11. Effect estimates of causal associations after mutual and covariate correction in MVMR.
Table s12. Ranking of models according to their PP using MR-BMA analysis.
Table s13-16. Results of TWAS, conditional analysis, permutation testing and colocalization analysis on neutrophils, Natural Killer T cells, plasmacytoid DCs and periodontitis.

## Sheet: S1
Table s1. Case definition and exclusion criteria in included GWASs.
GWAS data source	Study	Sample size (ncase/ncontrol)	Cases definition	Exclusion criteria	PMID
Immune cell (BCC)	26 cohorts included in the BCX2 consortium	563946	Blood count phenotypes were derived or measured separately in males and females for analysis and adjusted for age, agesquared, sex, principal components and cohort specific covariates.	Non-European participants, pregnancy, acute medical/surgical illness, blood cancer, leukemia, lymphoma, chemotherapy, myelodysplastic syndrome, bone marrow transplant, congenital or hereditary anemia, HIV, end-stage kidney disease, dialysis, EPO treatment, splenectomy, cirrhosis,WBC count > 100×109/L with > 5% immature cell or blasts, WBC > 200×109/L, Hemoglobin > 20 g/dL, Hematocrit > 60%, Plate…	32888494
Lymphocyte subsets (Sardinian)	The SardiNIA project	3757	Peripheral blood was collected and analyzed from 3757 individuals with immune characteristics from 6,602 general population individuals, and all models were adjusted for age and sex.	Population outside Sardinia, or age < 14 years.	32929287
Periodontitis (GLIDE)	6 cohorts included in the GLIDE consortium	35,096 (12,251/22,845)	Centers for Disease Control and Prevention/American Academy of Periodontology definitions (ARIC, SHIP, SHIP-TREND); Probing depth≥5.5 mm in 2 or more sextants, or if participants reported ever having gum surgery (COHRA1); Two or more tooth surfaces with probing depth≥5mm, or at least four tooth surfaces with probing depth≥4mm (TWINGENE); Participant-reported diagnosis of periodontitis (WGHS).	Non-European participants, or participants with no teeth.	31235808
Chronic periodontitis (FinnGen)	FinnGen	263,668 (4,434/259,234)	ICD10: K05.302	NA	36653562
Chronic gingivitis (FinnGen)		196,245 (850/195,395)	ICD10: K05.151	NA
Gingival hyperplasia (FinnGen)		259,613 (379/259,234)	ICD10: K06.101	NA
Abbreviations: ARIC, Atherosclerosis Risk in Communities; BCC, Blood Cell Consortium; BCX, Blood Cell Consortium; COHRA, The Center for Oral Health in Appalachia; EPO, erythropoietin; GLIDE, Gene-Lifestyle Interactions in Dental Endpoints; GWAS, genome-wide association study; HIV, human immunodeficiency virus; ICD The International Statistical Classification of Diseases and Related Health Problem…

## Sheet: S2
Table s2. Characteristics of the SNPs used as IVs in the MR.
Trait	Threshold	SNP	EA	OA	Beta	Se	pval	EAF	R2	F-statistic
B cell	P<1e-06, r2<0.01 in 10000 kb	rs12865434	G	A	0.1537	0.02404	1.834e-10	0.4777	0.0117883	40.8546
		rs142089808	G	A	-1.048	0.1941	7.03801e-08	0.0037	0.00809738	29.1363
		rs1966302	C	T	-0.1213	0.02419	5.52497e-07	0.5591	0.00725406	25.1311
		rs2679580	G	A	-0.1187	0.02392	7.30298e-07	0.5182	0.00703551	24.6117
		rs58114937	G	A	0.1852	0.03578	2.377e-07	0.1313	0.00782432	26.7771
		rs73520180	C	T	0.4493	0.08473	1.213e-07	0.0216	0.00853244	28.1035
		rs7500855	T	C	-0.1258	0.02435	2.509e-07	0.5064	0.00791152	26.6763
Basophil	P<1e-09, r2<0.001 in 10000 kb	rs10006833	C	T	-0.015606	0.002521	6.21999e-10	0.209061	8.05433e-05	38.3209
		rs10734121	A	G	-0.025432	0.002837	3.2802e-19	0.845295	0.000169162	80.3601
		rs10835333	G	A	0.014555	0.002161	1.67996e-11	0.349229	9.62926e-05	45.3642
		rs1086893	C	T	0.029865	0.002162	2.40991e-43	0.343174	0.000402087	190.815
		rs10927074	C	T	0.079216	0.0033	2.99916e-127	0.892265	0.00120644	576.23
		rs11064881	A	G	-0.032268	0.003923	2.05022e-16	0.073509	0.000141826	67.6559
		rs11097787	T	C	-0.014501	0.002087	3.83001e-12	0.402632	0.000101152	48.278
		rs11121246	G	T	0.012743	0.002043	4.58997e-10	0.502219	8.11904e-05	38.9049
		rs11591540	A	G	0.023539	0.002092	2.38013e-29	0.400517	0.000266075	126.605
		rs11768817	G	A	0.025494	0.004191	1.22e-09	0.064309	7.82186e-05	37.0032
		rs1186222	T	C	-0.022015	0.002077	3.20996e-26	0.461919	0.000240924	112.347
		rs12075	A	G	0.027771	0.002071	6.02005e-41	0.579533	0.000375857	179.813
		rs12123922	A	G	-0.027772	0.002057	1.72982e-41	0.440557	0.000380191	182.282
		rs12376511	C	T	-0.020682	0.002779	1.02991e-13	0.162947	0.000116685	55.3868
		rs12443468	G	A	0.014544	0.002451	3.03997e-09	0.225894	7.3978e-05	35.2111
		rs12447180	C	T	0.023452	0.002204	2.06016e-26	0.323627	0.00024078	113.223
		rs12453682	T	C	-0.01827	0.00224	3.59998e-16	0.695293	0.000141435	66.5241
		rs12459419	T	C	-0.016693	0.002188	2.44006e-14	0.322962	0.000121861	58.2066
		rs12497690	C	A	0.014579	0.002121	6.48037e-12	0.371338	9.92366e-05	47.2468
		rs12921873	T	C	0.015838	0.002547	5.19003e-10	0.210936	8.35014e-05	38.667
		rs12941811	C	T	-0.046353	0.002071	7.70903e-111	0.578198	0.00104802	500.949
		rs1295927	G	A	-0.024975	0.002055	5.83042e-34	0.447843	0.000308482	147.702
		rs13089722	A	G	-0.087989	0.0033	1.4388e-156	0.107756	0.00148872	710.93
		rs13188960	T	G	-0.019117	0.002278	5.08042e-17	0.27945	0.000147176	70.4255
		rs13419763	T	C	0.016215	0.002066	4.42996e-15	0.562498	0.000129409	61.5987
		rs142405270	G	A	0.050739	0.008204	6.41003e-10	0.018962	9.5782e-05	38.2499
		rs1427499	G	A	0.021037	0.002263	1.57e-20	0.710264	0.000182146	86.4165
		rs146970669	A	G	0.022392	0.003534	2.43002e-10	0.094107	8.54899e-05	40.1468
		rs149007767	T	C	0.026584	0.002887	3.48017e-20	0.162151	0.000192024	84.7901
		rs1537061	C	T	-0.025079	0.003425	2.54976e-13	0.098713	0.000111915	53.6164
		rs1598207	G	A	0.020189	0.002229	1.40994e-19	0.302655	0.00017205	82.0366
		rs1633768	T	C	-0.016647	0.002317	7.0194e-13	0.275307	0.000110579	51.62
		rs1669340	T	G	-0.033996	0.002785	3.0903e-34	0.839194	0.000311925	149.006
		rs16923637	T	G	0.014168	0.002274	4.79005e-10	0.286039	8.19873e-05	38.8181
		rs17625587	A	G	0.01499	0.002328	1.25e-10	0.263625	8.72406e-05	41.4606
		rs17758695	T	C	-0.124742	0.006145	1.46994e-91	0.029551	0.000892484	412.078
		rs17860282	T	C	0.104693	0.009859	2.61999e-26	0.011189	0.000242532	112.763
		rs182090955	A	G	-0.087651	0.010695	2.61999e-16	0.009832	0.000149587	67.1661
		rs2028900	T	C	-0.01396	0.002059	1.24997e-11	0.449306	9.64392e-05	45.9681
		rs2074585	A	G	-0.030894	0.00205	2.71019e-51	0.514859	0.000476798	227.111
		rs2089979	G	A	-0.013908	0.002084	2.59e-11	0.415685	9.3966e-05	44.5381
		rs2118140	G	A	0.018347	0.002052	4.02995e-19	0.528383	0.000167764	79.9417
		rs2282986	C	T	-0.088653	0.007728	1.98016e-30	0.018065	0.000278829	131.598
		rs2286599	A	G	0.023189	0.003001	1.15001e-14	0.141728	0.00013082	59.7077
		rs2289511	A	G	-0.016386	0.002078	3.29989e-15	0.582293	0.000130614	62.1803
		rs247833	A	G	0.016173	0.002392	1.42004e-11	0.248859	9.77881e-05	45.7148
		rs2594836	A	G	-0.017777	0.002319	1.86982e-14	0.722276	0.000126784	58.7643
		rs2606724	A	G	0.015734	0.002124	1.33015e-13	0.453028	0.000122687	54.8741
		rs2607278	T	C	0.022731	0.002225	1.79019e-24	0.306108	0.0002195	104.37
		rs2738104	A	G	0.018357	0.00218	4.00959e-17	0.67231	0.000148479	70.9069
		rs2834670	G	A	0.028259	0.003218	1.69005e-18	0.17203	0.00022749	77.1151
		rs2836241	C	T	0.013945	0.002086	2.36974e-11	0.404821	9.37082e-05	44.6896
		rs2860773	T	G	0.019124	0.002085	5.03037e-20	0.407715	0.000176634	84.1286
		rs28647824	A	C	-0.017508	0.002312	3.83972e-14	0.267348	0.000120082	57.345
		rs2959356	G	A	0.014017	0.002241	4.14e-10	0.298096	8.22193e-05	39.1223
		rs2967595	T	C	-0.026046	0.00277	5.58985e-21	0.167857	0.000189518	88.4139
		rs2977799	G	A	0.027476	0.002057	1.17004e-40	0.50924	0.000377336	178.417
		rs2998286	C	T	0.020883	0.002443	1.31009e-17	0.769831	0.000154546	73.0696
		rs3181077	T	C	-0.037064	0.00228	2.22998e-59	0.718492	0.000555709	264.261
		rs3184504	C	T	-0.02822	0.002051	5.08042e-43	0.518576	0.000397635	189.313
		rs34097845	T	C	0.043291	0.004593	4.58036e-21	0.056678	0.000200401	88.8384
		rs34158728	A	G	0.094813	0.006172	3.23966e-53	0.028263	0.000493779	235.984
		rs34288539	T	C	-0.015157	0.002317	6.34016e-11	0.273948	9.13887e-05	42.793
		rs34500	A	G	-0.026288	0.003721	1.66994e-12	0.084024	0.000106373	49.9107
		rs34780507	G	A	0.03512	0.004154	2.96006e-17	0.065683	0.000151386	71.4783
		rs34850939	A	G	0.013806	0.002243	7.74997e-10	0.349046	8.66161e-05	37.8857
		rs357618	G	A	-0.013804	0.002098	4.91021e-11	0.388132	9.05059e-05	43.2909
		rs3731332	T	C	-0.103985	0.007064	5.36043e-49	0.022182	0.000469062	216.69
		rs3781452	T	C	0.019847	0.002131	1.33999e-20	0.632095	0.000183205	86.7403
		rs4060971	T	C	-0.02066	0.002069	1.85012e-23	0.551092	0.000211189	99.7098
		rs42030	A	G	0.030212	0.003869	6.08976e-15	0.076053	0.000128278	60.9761
		rs4324460	G	T	0.024167	0.002509	6.15035e-22	0.218923	0.000199738	92.7774
		rs4475963	G	T	-0.013524	0.002127	2.10999e-10	0.370213	8.52876e-05	40.4272
		rs449454	G	A	0.012748	0.00211	1.55998e-09	0.617406	7.67756e-05	36.5021
		rs4503179	A	G	0.016855	0.002319	3.76964e-13	0.723546	0.000113652	52.8268
		rs45577137	G	A	-0.045322	0.005335	2.08018e-17	0.045208	0.000177326	72.1685
		rs4602187	T	C	0.014094	0.002227	2.53e-10	0.683135	8.59962e-05	40.0522
		rs4876400	G	A	-0.017086	0.002111	6.00067e-16	0.626316	0.00013665	65.5092
		rs4911102	T	C	-0.021694	0.00244	6.45952e-19	0.234267	0.000168849	79.0493
		rs55690609	A	G	-0.03494	0.0022	8.931e-57	0.322693	0.000533643	252.231
		rs56043070	A	G	-0.026025	0.003975	6.03949e-11	0.071468	8.98918e-05	42.8653
		rs561102	T	C	-0.01406	0.002162	8.12082e-11	0.65494	8.93505e-05	42.2919
		rs56179563	A	G	0.014617	0.002124	6.09958e-12	0.389066	0.00010157	47.3593
		rs56388170	T	G	0.031399	0.002277	3.33964e-43	0.293002	0.000408461	190.153
		rs56406125	T	G	-0.034946	0.002607	6.03949e-41	0.190072	0.000376001	179.685
		rs5756822	T	C	-0.012152	0.00206	3.79001e-09	0.555923	7.29119e-05	34.7984
		rs5766582	T	C	-0.016936	0.002055	1.77011e-16	0.474655	0.000143046	67.9198
		rs6045612	T	C	-0.016734	0.00233	7.1796e-13	0.26377	0.00010876	51.5805
		rs6091176	T	C	0.01369	0.002337	4.79999e-09	0.261115	7.23179e-05	34.3153
		rs6141781	T	C	0.032512	0.002901	4.12003e-29	0.147056	0.000265168	125.6
		rs62021606	G	T	-0.03429	0.004663	1.99986e-13	0.050595	0.00011296	54.0757
		rs62105478	A	G	-0.031667	0.004658	1.08993e-11	0.051684	9.82999e-05	46.2182
		rs62160676	C	T	-0.016626	0.002285	3.57026e-13	0.296123	0.000115232	52.9421
		rs6421984	C	T	0.018366	0.002068	6.96947e-19	0.514051	0.000168522	78.8726
		rs6543144	G	A	0.013669	0.002219	7.43002e-10	0.312924	8.03428e-05	37.9452
		rs6557615	A	G	-0.018779	0.002208	1.9002e-17	0.681024	0.000153213	72.3344
		rs6671847	A	G	0.01357	0.002058	4.44017e-11	0.508234	9.20475e-05	43.4778
		rs67175901	T	C	0.026075	0.003356	8.23948e-15	0.108202	0.000131214	60.3675
		rs6780544	A	G	-0.016363	0.00211	9.31966e-15	0.62255	0.000125832	60.1394
		rs6927569	C	T	0.021693	0.002051	4.21988e-26	0.523015	0.000234795	111.868
		rs695113	T	C	0.01697	0.002242	3.93007e-14	0.696269	0.000121804	57.2916
		rs7044519	G	T	0.016724	0.002799	2.37001e-09	0.16139	7.57089e-05	35.7004
		rs7078507	G	A	-0.016071	0.002107	2.5398e-14	0.609239	0.000122974	58.1775
		rs7196129	C	T	0.016801	0.002081	7.18952e-16	0.529408	0.000140649	65.1815
		rs7250849	T	G	0.021532	0.003328	1.01e-10	0.107192	8.874e-05	41.8601
		rs72721631	A	C	-0.019316	0.002422	1.59993e-15	0.237093	0.000134975	63.604
		rs7285377	T	G	0.014495	0.002273	1.85999e-10	0.284156	8.54755e-05	40.6664
		rs73049252	A	G	-0.037196	0.004388	2.41991e-17	0.058507	0.000152422	71.8551
		rs73987603	A	G	0.024035	0.002752	2.63998e-18	0.166369	0.000160238	76.2763
		rs7420	T	C	-0.01315	0.002061	1.81001e-10	0.53772	8.59692e-05	40.7093
		rs742631	T	C	-0.01662	0.002297	4.82948e-13	0.28374	0.000112275	52.3526
		rs74472890	C	T	0.102642	0.004745	1.02094e-103	0.04944	0.000990235	467.925
		rs74535412	A	G	0.038458	0.005749	2.30994e-11	0.034635	9.89032e-05	44.7494
		rs7503461	T	C	-0.01342	0.002193	9.59997e-10	0.318513	7.81843e-05	37.4478
		rs7515985	G	A	0.013605	0.002078	6.05062e-11	0.415798	8.99234e-05	42.8651
		rs7573465	T	G	0.015498	0.002064	6.26037e-14	0.556148	0.00011858	56.3807
		rs7613595	C	A	-0.036371	0.002483	1.54989e-48	0.217603	0.000450435	214.563
		rs76427287	C	T	-0.028841	0.002472	2.07014e-31	0.254032	0.000315253	136.12
		rs76428106	C	T	0.081896	0.009385	2.77971e-18	0.013391	0.00017722	76.1474
		rs77785849	A	C	0.035989	0.005781	4.94003e-10	0.033466	8.37897e-05	38.7554
		rs7832357	G	A	-0.015431	0.002158	8.9002e-13	0.342269	0.00010721	51.1309
		rs78744187	T	C	-0.130213	0.003757	1e-200	0.081739	0.00254527	1201.23
		rs79140637	A	G	-0.027476	0.004583	2.09002e-09	0.054158	7.73425e-05	35.9423
		rs8113682	G	T	-0.021612	0.002364	6.41062e-20	0.747423	0.000176352	83.5782
		rs8178414	T	C	0.073906	0.00909	4.48023e-16	0.012939	0.000139519	66.1043
		rs875740	A	C	-0.017944	0.002172	1.51985e-16	0.665329	0.000143391	68.2523
		rs905670	A	G	-0.014307	0.002142	2.49e-11	0.350304	9.31714e-05	44.6125
		rs915125	T	C	-0.029254	0.002288	2.18022e-37	0.281093	0.000345878	163.477
		rs9819371	T	C	-0.0301	0.00419	7.05018e-13	0.064572	0.00010945	51.6063
		rs9928015	T	G	-0.014985	0.002233	2.01002e-11	0.302009	9.46702e-05	45.0333
CD4+ Regulatory T	P<5e-06, r2<0.01 in 10000 kb	rs1268153	A	G	0.8168	0.17	1.61202e-06	0.0053	0.00703444	23.0716
		rs140960913	T	C	0.3563	0.07657	3.38797e-06	0.0276	0.00681421	21.6401
		rs145600407	T	C	-0.4993	0.1023	1.102e-06	0.0206	0.0100596	23.8077
		rs149951966	C	T	0.2109	0.04275	8.45707e-07	0.1035	0.00825418	24.3235
		rs17717645	C	T	0.391	0.07969	9.68992e-07	0.0267	0.00794587	24.0597
		rs188505795	T	G	0.3047	0.065	2.87197e-06	0.0388	0.00692501	21.9616
		rs61839660	T	C	0.2717	0.05567	1.10301e-06	0.0542	0.00756847	23.8057
		rs7162344	A	G	-0.1224	0.02515	1.19501e-06	0.4314	0.00734987	23.6718
		rs72833913	A	C	0.1885	0.04072	3.79603e-06	0.1065	0.00676234	21.4167
		rs78334049	A	G	0.1988	0.04067	1.06901e-06	0.1051	0.0074343	23.8797
CD4+ T cell	P<5e-06, r2<0.01 in 10000 kb	rs10040274	A	G	0.132	0.02702	1.064e-06	0.2685	0.00684442	23.8528
		rs117563350	G	A	-0.324	0.06938	3.12399e-06	0.0312	0.00634613	21.7963
		rs137903114	C	T	-0.9366	0.1901	8.72107e-07	0.004	0.00698969	24.2609
		rs1849876	C	T	0.1324	0.02769	1.81301e-06	0.7529	0.00652253	22.8503
		rs3184504	C	T	-0.1838	0.02676	7.66126e-12	0.5305	0.0168284	47.1499
		rs3211602	A	G	-1.654	0.3577	3.879e-06	0.0012	0.00655784	21.3695
		rs414743	A	G	0.1352	0.02918	3.73001e-06	0.2367	0.00660506	21.4558
		rs61935579	A	G	-0.2776	0.06065	4.87899e-06	0.0412	0.00608827	20.9382
		rs7162344	A	G	-0.1136	0.02442	3.37101e-06	0.4295	0.0063242	21.6286
		rs72960548	C	T	0.2456	0.04852	4.341e-07	0.073	0.00816374	25.6081
CD8+ T cell	P<1e-06, r2<0.01 in 10000 kb	rs11197647	T	G	0.2221	0.04476	7.32302e-07	0.0754	0.00687784	24.6082
		rs2006098	G	A	-0.1621	0.03153	2.87601e-07	0.3639	0.0121648	26.4168
		rs2267983	A	C	-0.1266	0.02472	3.176e-07	0.3924	0.00764265	26.214
		rs2516466	G	T	0.1719	0.02778	6.74295e-10	0.3758	0.0138632	38.2692
		rs6858602	C	T	-0.1209	0.02381	3.96004e-07	0.4618	0.00726575	25.7689
Dendritic Cell	P<1e-06, r2<0.01 in 10000 kb	rs112750600	T	C	0.5724	0.1163	9.05795e-07	0.0114	0.00738507	24.2093
		rs12036432	A	C	0.1381	0.02696	3.16301e-07	0.3103	0.00816318	26.2235
		rs139376787	A	G	-0.2409	0.04834	6.53898e-07	0.0754	0.0080915	24.8201
		rs191217950	A	G	0.6722	0.127	1.276e-07	0.0096	0.00859229	27.9983
		rs2494208	A	G	-0.1486	0.02899	3.12097e-07	0.7503	0.00827411	26.2593
		rs34622012	G	A	0.1977	0.03844	2.85601e-07	0.1199	0.00824887	26.4356
		rs35211479	G	T	0.153	0.0292	1.69001e-07	0.7192	0.00945496	27.4385
		rs55971447	T	C	0.5889	0.02846	1.19812e-89	0.2358	0.124987	427.913
		rs62504404	A	G	0.125	0.02491	5.47797e-07	0.4843	0.0078048	25.1661
		rs71639910	A	G	0.2758	0.05031	4.49697e-08	0.0688	0.00974653	30.0346
		rs9651035	T	C	0.2381	0.02728	4.00498e-18	0.3251	0.0248774	76.1329
Eosinophil	P<1e-09, r2<0.001 in 10000 kb	rs1004870	T	C	0.026184	0.002014	1.26999e-38	0.588952	0.000331951	169.025
		rs10062687	G	T	0.024145	0.002349	9.47109e-25	0.232866	0.000208287	105.654
		rs10165678	A	G	-0.014675	0.002302	1.89998e-10	0.757518	7.9115e-05	40.6391
		rs10195713	T	C	0.02494	0.002947	2.73968e-17	0.864395	0.000145818	71.6194
		rs10208293	A	G	-0.078905	0.002186	1e-200	0.286689	0.00254641	1302.89
		rs1036332	C	A	-0.032696	0.002257	1.6099e-47	0.737405	0.000414011	209.857
		rs1037674	T	G	0.013204	0.002188	1.63001e-09	0.292292	7.21294e-05	36.4179
		rs1039341	T	C	-0.02389	0.002145	8.79023e-29	0.310888	0.000244543	124.044
		rs1047891	A	C	0.016967	0.002127	1.54989e-15	0.315457	0.000124331	63.6317
		rs1057258	T	C	-0.032126	0.002589	2.52e-35	0.178094	0.000302145	153.974
		rs10745763	T	G	0.01349	0.002018	2.40991e-11	0.423316	8.88498e-05	44.6868
		rs10777378	A	G	-0.022488	0.001989	1.27997e-29	0.535724	0.000251564	127.829
		rs10782957	T	C	0.022538	0.002042	2.80996e-28	0.621606	0.000238957	121.82
		rs10876550	A	G	0.013811	0.001998	4.9204e-12	0.559198	9.4035e-05	47.7812
		rs10900595	A	C	0.015482	0.002189	1.59001e-12	0.713282	9.80393e-05	50.022
		rs10930337	T	C	0.01471	0.002192	2.03002e-11	0.284759	8.81425e-05	45.0342
		rs1099448	T	C	0.017702	0.001998	8.31955e-19	0.466357	0.000155971	78.4968
		rs11071559	T	C	-0.0222	0.002945	4.93969e-14	0.13051	0.000111852	56.8242
		rs111759324	T	C	-0.043024	0.00316	3.55959e-42	0.110759	0.000364628	185.373
		rs112036266	T	C	0.016842	0.002626	1.47999e-10	0.176245	8.2363e-05	41.1335
		rs11204682	T	G	-0.041331	0.002388	4.8899e-67	0.223016	0.000592011	299.558
		rs11255507	G	T	0.020196	0.00261	1.05003e-14	0.17824	0.000119484	59.8753
		rs113105190	C	T	-0.033068	0.003942	5.19039e-17	0.068122	0.000138833	70.3689
		rs113473633	G	A	-0.063217	0.006522	3.46976e-22	0.026223	0.000204098	93.9516
		rs113496608	A	G	-0.044847	0.005802	1.13006e-14	0.030304	0.000118204	59.7461
		rs113542380	A	G	-0.026862	0.003797	1.54989e-12	0.075059	0.00010019	50.0488
		rs114152720	A	G	-0.036252	0.005897	8.07997e-10	0.030153	7.68648e-05	37.792
		rs114741563	C	T	0.119573	0.011508	2.93968e-25	0.007538	0.000213927	107.96
		rs11555542	C	T	0.06384	0.004108	2.11982e-54	0.062749	0.000479378	241.503
		rs115647629	A	G	-0.067273	0.006524	6.6896e-25	0.026499	0.000233495	106.329
		rs115697464	C	T	-0.065055	0.008158	1.6099e-15	0.015017	0.0001252	63.5905
		rs11571404	T	C	0.015424	0.002485	5.57006e-10	0.203363	7.70826e-05	38.5247
		rs11628569	G	A	-0.016588	0.002198	4.70002e-14	0.289982	0.000113307	56.9549
		rs11647946	A	G	-0.013303	0.002186	1.2e-09	0.707653	7.32231e-05	37.0337
		rs11684770	G	A	-0.014768	0.002222	3.10027e-11	0.270352	8.60432e-05	44.1726
		rs11695281	T	C	-0.022977	0.00198	4.08978e-31	0.514407	0.000263752	134.665
		rs11701475	C	T	0.014907	0.002442	1.06001e-09	0.22262	7.69145e-05	37.2638
		rs11702918	T	C	-0.022316	0.00328	1.05999e-11	0.102562	9.16756e-05	46.2896
		rs1170439	C	T	0.022511	0.002403	7.85959e-21	0.779264	0.000174332	87.7567
		rs117068593	T	C	-0.026091	0.002543	1.17004e-24	0.190092	0.00020961	105.266
		rs11786536	A	G	-0.026746	0.002705	5.10975e-23	0.164896	0.000197015	97.7645
		rs117955557	T	G	-0.030385	0.002277	1.44012e-40	0.256399	0.00035205	178.07
		rs117961539	A	G	-0.03098	0.0052	2.63003e-09	0.039583	7.29729e-05	35.4939
		rs118013485	A	G	-0.033602	0.004068	1.53993e-16	0.06696	0.000141083	68.2286
		rs11869228	T	C	0.020575	0.002712	3.44985e-14	0.840958	0.000113239	57.557
		rs11886928	G	T	-0.014387	0.00214	1.85994e-11	0.30847	8.83069e-05	45.1972
		rs11931711	T	C	0.019253	0.002213	3.48017e-18	0.282445	0.00015025	75.6889
		rs12100034	A	G	-0.017045	0.002079	2.60016e-16	0.359122	0.000133734	67.2176
		rs12154498	C	A	-0.032542	0.002817	7.76068e-31	0.854434	0.000263425	133.448
		rs121564	T	G	-0.016564	0.002233	1.26009e-13	0.270023	0.000108161	55.0239
		rs12208103	T	C	-0.030736	0.002069	6.82967e-50	0.378399	0.000444413	220.685
		rs12408934	A	G	-0.041319	0.00328	2.35993e-36	0.10259	0.000314359	158.69
		rs12487980	A	C	0.012539	0.002073	1.5e-09	0.633844	7.29801e-05	36.5869
		rs12515180	T	C	-0.072098	0.002004	1e-200	0.425948	0.00254205	1294.34
		rs12530946	G	A	0.042755	0.002044	3.99025e-97	0.613323	0.000867045	437.532
		rs12540285	G	A	0.014646	0.002396	1.01e-09	0.22062	7.3767e-05	37.3648
		rs12545733	C	T	-0.030733	0.002188	8.9002e-45	0.703401	0.000394106	197.294
		rs1265564	C	A	0.080073	0.002035	1e-200	0.442517	0.00316347	1548.25
		rs12681644	T	C	-0.019435	0.002427	1.22999e-15	0.211927	0.000126169	64.125
		rs12705849	A	G	-0.020577	0.002021	2.54976e-24	0.406896	0.000204366	103.664
		rs12820863	T	C	0.022466	0.002142	1.07004e-25	0.351578	0.000230123	110.005
		rs12861824	C	T	-0.020977	0.002402	2.59e-18	0.275439	0.000175637	76.2674
		rs12878610	C	T	-0.013183	0.001994	3.95003e-11	0.475864	8.66933e-05	43.7096
		rs12928503	T	C	-0.048995	0.007294	1.91999e-11	0.019564	9.20896e-05	45.1201
		rs12941068	A	G	-0.013905	0.002272	9.59003e-10	0.285851	7.89406e-05	37.4562
		rs1296535	T	C	-0.019052	0.002417	3.34965e-15	0.777485	0.000125592	62.1335
		rs13073683	C	T	0.015579	0.002021	1.32008e-14	0.399148	0.000116415	59.4216
		rs13105682	G	T	-0.026611	0.00433	8.21997e-10	0.059685	7.94861e-05	37.7698
		rs13120371	G	A	0.015459	0.002118	2.99985e-13	0.327238	0.000105225	53.2732
		rs13138355	T	C	-0.054823	0.002551	2.34963e-102	0.185539	0.000908366	461.852
		rs13207791	G	A	0.025659	0.003539	4.30031e-13	0.088551	0.000106276	52.5674
		rs1323650	T	G	-0.013614	0.002151	2.53e-10	0.680787	8.05552e-05	40.058
		rs13313564	A	G	-0.069286	0.005441	4.21017e-37	0.034538	0.00032015	162.156
		rs13511	C	T	-0.016355	0.002009	4.12952e-16	0.57742	0.000130536	66.2734
		rs1353286	G	T	0.020226	0.00199	3.0903e-24	0.453022	0.00020274	103.303
		rs139640694	G	A	0.024854	0.003415	3.53997e-13	0.092902	0.000104112	52.9675
		rs140509806	A	G	0.099069	0.012308	8.73977e-16	0.008506	0.000165547	64.7886
		rs1406449	C	T	-0.012188	0.001986	8.69e-10	0.461666	7.38371e-05	37.6621
		rs1427499	G	A	0.018666	0.002183	1.29987e-17	0.710269	0.0001434	73.1128
		rs145947882	C	A	-0.059933	0.006329	2.97989e-21	0.0263	0.000183968	89.6727
		rs146078144	A	G	0.085887	0.010438	1.99986e-16	0.009579	0.000139967	67.7046
		rs149110519	T	C	0.038205	0.005388	1.38995e-12	0.035905	0.000101052	50.2786
		rs150640087	T	G	0.099543	0.008004	1.80011e-35	0.016244	0.000316688	154.67
		rs1516527	C	T	-0.032276	0.004596	2.25009e-12	0.951148	9.68099e-05	49.3171
		rs1519602	G	T	0.012746	0.002069	7.43002e-10	0.647802	7.41322e-05	37.9512
		rs159963	A	C	0.01933	0.002017	9.88098e-22	0.581974	0.000181803	91.8438
		rs1672753	T	C	-0.01748	0.002545	6.74062e-12	0.811014	9.36636e-05	47.1743
		rs1684578	T	G	0.016362	0.002017	5.14991e-16	0.415559	0.00013004	65.805
		rs16956811	G	T	-0.029348	0.003685	1.74985e-15	0.080686	0.000127776	63.4279
		rs17061503	A	G	0.035528	0.002159	8.04081e-61	0.307403	0.000537477	270.791
		rs17175830	A	G	0.032179	0.002365	4.13048e-42	0.237656	0.00037521	185.132
		rs17293632	T	C	0.02962	0.002337	8.92072e-37	0.236264	0.000316622	160.639
		rs17482472	A	G	-0.031481	0.003346	5.33949e-21	0.098902	0.000176646	88.5204
		rs17668272	T	G	-0.041656	0.003072	7.47997e-42	0.117796	0.000360649	183.87
		rs17682575	T	C	-0.017647	0.002487	1.33015e-12	0.201301	0.000100138	50.3487
		rs17689159	C	T	-0.014419	0.002132	1.39991e-11	0.314846	8.96988e-05	45.7398
		rs17758695	T	C	-0.122123	0.005948	1.32008e-93	0.029555	0.000855513	421.552
		rs17849501	T	C	-0.026789	0.004469	2.1e-09	0.052001	7.07559e-05	35.9328
		rs1800692	G	A	-0.018051	0.002039	8.92072e-19	0.58754	0.000157925	78.373
		rs180506	A	G	-0.02299	0.002385	5.81969e-22	0.776272	0.000183587	92.9179
		rs1828803	A	C	0.013079	0.002033	1.28e-10	0.392417	8.15704e-05	41.3878
		rs201798	A	G	0.020184	0.002044	5.70953e-23	0.614944	0.000192932	97.5104
		rs2025489	G	A	0.015769	0.00199	2.41991e-15	0.526005	0.000123994	62.7914
		rs2089979	G	A	-0.014931	0.002013	1.24997e-13	0.415851	0.00010831	55.0159
		rs2095044	C	T	-0.093857	0.002265	1e-200	0.742759	0.00336629	1717.1
		rs214080	G	A	0.012908	0.002009	1.37e-10	0.579931	8.11792e-05	41.2816
		rs2182885	A	G	0.026326	0.00203	2.05022e-38	0.605228	0.000331181	168.181
		rs2223043	G	A	0.019382	0.002295	3.22998e-17	0.306981	0.000159839	71.3231
		rs2228467	C	T	0.062272	0.004111	8.8308e-52	0.061584	0.000448207	229.45
		rs2239633	A	G	0.034771	0.001986	1.50003e-68	0.483519	0.000603854	306.531
		rs2255531	A	G	-0.016385	0.002079	3.39e-15	0.350975	0.00012231	62.1129
		rs2399441	C	T	-0.018868	0.002069	8.07979e-20	0.350554	0.000162099	83.1628
		rs2419313	A	G	-0.020727	0.002869	5.20955e-13	0.142533	0.000105011	52.1927
		rs2431097	T	C	0.015023	0.001999	5.94977e-14	0.485547	0.000112751	56.4789
		rs244689	G	A	-0.02124	0.00303	2.4598e-12	0.876598	9.76027e-05	49.1385
		rs2497318	T	C	-0.029864	0.00202	1.9602e-49	0.442619	0.000440056	218.57
		rs2502995	C	T	0.021853	0.002002	1.05999e-27	0.57046	0.000234035	119.149
		rs2566133	C	T	-0.014365	0.002015	1.05999e-12	0.583621	0.000100291	50.8229
		rs2568928	G	A	0.015221	0.002308	4.38026e-11	0.756846	8.52718e-05	43.4924
		rs2579506	A	G	0.047465	0.002032	1.1695e-120	0.386176	0.00106809	545.629
		rs2646438	A	G	-0.020516	0.002001	1.20005e-24	0.565689	0.000206821	105.121
		rs2713548	T	C	0.012505	0.002046	1.02e-09	0.632646	7.26847e-05	37.3555
		rs2788211	C	T	0.016029	0.002573	4.79005e-10	0.81734	7.67165e-05	38.8089
		rs2807740	T	C	0.035325	0.002358	1.05003e-50	0.76966	0.000442448	224.427
		rs2838317	C	A	0.012853	0.001994	1.2e-10	0.550072	8.17714e-05	41.5486
		rs2847266	T	C	-0.014442	0.002242	1.22e-10	0.716855	8.46691e-05	41.4936
		rs2850542	T	G	-0.013206	0.00202	6.4998e-11	0.556342	8.6092e-05	42.7403
		rs28532037	A	G	-0.029653	0.003416	4.18986e-18	0.906507	0.000149045	75.3529
		rs2887502	T	C	-0.013621	0.002024	1.7398e-11	0.590214	8.97459e-05	45.2893
		rs2894401	G	A	-0.020541	0.002187	6.16027e-21	0.705252	0.000175416	88.2153
		rs2920505	A	G	-0.029644	0.002019	9.46891e-49	0.601796	0.000421171	215.575
		rs295	C	A	0.015869	0.002337	1.16011e-11	0.235064	9.05608e-05	46.1084
		rs295273	A	G	0.020579	0.002274	1.50003e-19	0.255616	0.000161162	81.8966
		rs2979489	A	G	0.013752	0.002266	1.32999e-09	0.741697	7.24632e-05	36.8307
		rs2992333	A	G	-0.034153	0.002028	1.3499e-63	0.598657	0.000560508	283.609
		rs301162	G	A	0.026139	0.002803	1.16011e-20	0.853049	0.000171299	86.9621
		rs3024971	G	T	-0.040232	0.003209	5.03965e-36	0.107204	0.000309839	157.182
		rs3093023	A	G	0.012677	0.001998	2.27002e-10	0.43381	7.8945e-05	40.2569
		rs3110791	C	T	0.015409	0.002059	7.49031e-14	0.623422	0.000111485	56.006
		rs3218148	A	G	-0.017678	0.001991	7.07946e-19	0.539783	0.000155267	78.8355
		rs33982662	A	C	0.020435	0.002192	1.18987e-20	0.285267	0.000170284	86.9093
		rs34173062	A	G	0.054559	0.004091	1.54989e-40	0.072995	0.000402845	177.857
		rs34210653	A	G	-0.175565	0.006973	8.10961e-140	0.020746	0.00125238	633.92
		rs34212866	G	A	0.020115	0.002401	5.73984e-17	0.220743	0.0001392	70.1866
		rs34290285	A	G	-0.045886	0.002267	4.73042e-91	0.257132	0.000804374	409.69
		rs34439695	T	C	-0.037944	0.005456	3.67029e-12	0.035263	9.7959e-05	48.3655
		rs34448954	T	C	-0.025253	0.003211	3.8699e-15	0.106374	0.00012124	61.8505
		rs34466956	T	C	-0.01354	0.002029	2.60016e-11	0.5676	8.99902e-05	44.5319
		rs34495	T	G	-0.01983	0.002155	3.67029e-20	0.304172	0.000166455	84.6738
		rs34505104	G	A	-0.026127	0.00216	1.22011e-33	0.306171	0.000290018	146.309
		rs346835	T	C	-0.02669	0.002104	7.54918e-37	0.328293	0.000314173	160.918
		rs350836	T	C	-0.017201	0.002205	6.41062e-15	0.709927	0.000121859	60.8539
		rs35249183	G	A	0.039991	0.003364	1.46016e-32	0.099837	0.000287453	141.322
		rs35409523	A	G	0.050096	0.003754	1.42988e-40	0.075881	0.000351963	178.08
		rs36084354	A	G	-0.045367	0.003441	1.17004e-39	0.091843	0.000343334	173.824
		rs3747869	C	A	0.019825	0.003316	2.30999e-09	0.90083	7.0223e-05	35.7434
		rs3757114	C	A	-0.025241	0.001987	6.15035e-37	0.474247	0.000317709	161.367
		rs3785356	T	C	0.030168	0.00218	1.69981e-43	0.298035	0.000380808	191.504
		rs3786586	G	A	0.031904	0.00275	4.41977e-31	0.154646	0.000266132	134.593
		rs3790163	G	A	-0.015292	0.002521	1.34999e-09	0.792407	7.69342e-05	36.7943
		rs3823536	A	G	-0.017818	0.001986	3.16009e-19	0.467209	0.000158058	80.4929
		rs3824867	G	A	0.016826	0.002193	1.77011e-14	0.712364	0.000116021	58.8685
		rs3846855	A	G	0.028194	0.002567	5.00956e-28	0.182937	0.00023763	120.631
		rs397187	C	T	-0.012281	0.002022	1.28e-09	0.429693	7.39204e-05	36.8895
		rs4074672	T	C	0.014516	0.00205	1.48013e-12	0.369285	9.81564e-05	50.14
		rs410867	G	A	-0.059414	0.00241	4.12098e-134	0.216683	0.00119831	607.773
		rs412884	C	T	0.057634	0.002109	2.2182e-164	0.672171	0.00146391	746.797
		rs4148757	C	A	-0.017147	0.002441	2.23975e-12	0.210055	9.75745e-05	49.3445
		rs4236746	G	A	0.056854	0.006399	6.77954e-19	0.975145	0.000156688	78.9398
		rs4240624	A	G	-0.020391	0.003453	3.62001e-09	0.909011	6.87805e-05	34.8724
		rs4280242	T	C	-0.032913	0.002318	1.02991e-45	0.754112	0.000401734	201.607
		rs4310436	A	G	0.018785	0.003065	9.14998e-10	0.119611	7.43187e-05	37.5629
		rs4409785	C	T	0.016435	0.00263	4.25001e-10	0.172343	7.70572e-05	39.0505
		rs45577137	G	A	-0.059758	0.005157	5.10035e-31	0.045218	0.000308346	134.275
		rs4618204	C	T	0.018183	0.002001	1.08993e-19	0.443836	0.000163225	82.5724
		rs466547	G	A	0.019109	0.002846	1.94984e-11	0.857978	8.89893e-05	45.0821
		rs4703589	C	T	0.014451	0.001983	3.25987e-13	0.532652	0.00010397	53.1066
		rs4703730	T	C	-0.016026	0.001984	6.91035e-16	0.516976	0.000128268	65.2477
		rs4721559	T	C	-0.017424	0.002234	6.55994e-15	0.278141	0.000121911	60.8314
		rs4722171	G	A	-0.027253	0.002019	1.83021e-41	0.592101	0.000358763	182.202
		rs473739	G	T	-0.013882	0.002128	7.06968e-11	0.31889	8.37129e-05	42.5558
		rs4857909	G	A	0.120719	0.003053	1e-200	0.87972	0.00308403	1563.49
		rs4908835	C	T	0.019184	0.002719	1.80011e-12	0.161355	9.96022e-05	49.7804
		rs4931002	A	C	-0.02158	0.002388	1.72982e-19	0.779279	0.000160203	81.6643
		rs495149	T	C	0.024275	0.002674	1.15001e-19	0.164184	0.00016173	82.4126
		rs496475	G	T	0.035017	0.002033	1.83021e-66	0.387008	0.000581785	296.675
		rs556063	G	A	0.012802	0.002003	1.68e-10	0.573536	8.01731e-05	40.85
		rs55868524	A	G	0.013148	0.002031	9.9106e-11	0.605887	8.25585e-05	41.9081
		rs55879743	T	C	0.077662	0.004051	7.06968e-82	0.066369	0.00074746	367.528
		rs56179563	A	G	0.017858	0.002055	3.8699e-18	0.389076	0.000151606	75.5162
		rs56330463	C	T	0.039484	0.002008	5.38022e-86	0.55326	0.000770649	386.646
		rs574183	G	A	-0.013813	0.002036	1.20005e-11	0.388961	9.06945e-05	46.0276
		rs5747308	C	A	0.015575	0.001987	4.81948e-15	0.504517	0.00012128	61.441
		rs57633475	G	A	-0.02465	0.003048	6.36063e-16	0.121715	0.00012991	65.4037
		rs58745116	A	G	-0.015201	0.002034	8.20918e-14	0.391451	0.00011009	55.8522
		rs58833930	T	C	-0.023363	0.003139	1.02991e-13	0.112968	0.000109391	55.3953
		rs60175411	A	G	-0.029781	0.002681	1.24997e-28	0.166741	0.000246451	123.391
		rs60600003	G	T	0.042906	0.003317	3.05e-38	0.100334	0.00033235	167.318
		rs60646393	A	G	-0.024038	0.004027	2.45002e-09	0.065569	7.08064e-05	35.6313
		rs6080761	A	G	0.01848	0.002014	4.75007e-20	0.419413	0.000166319	84.1944
		rs6103572	C	T	-0.024061	0.002237	5.95937e-27	0.729098	0.000228694	115.689
		rs6141755	T	G	-0.016817	0.002348	8.30042e-13	0.236009	0.000101987	51.2978
		rs62006172	A	G	-0.037536	0.004973	4.61955e-14	0.041969	0.000113301	56.9714
		rs62011287	G	A	-0.01269	0.002091	1.31999e-09	0.344259	7.27061e-05	36.831
		rs62061733	G	A	-0.032296	0.002364	1.91999e-42	0.229432	0.000368801	186.638
		rs62105489	T	C	-0.030245	0.004452	1.13006e-11	0.052894	9.1652e-05	46.1525
		rs62117160	A	G	-0.047573	0.00477	2.14981e-23	0.045256	0.000195575	99.4678
		rs62183994	T	C	0.026904	0.004517	2.65003e-09	0.050879	6.99075e-05	35.4758
		rs62308111	T	G	0.015386	0.0024	1.5e-10	0.221457	8.16307e-05	41.0986
		rs62408224	G	A	-0.042179	0.002073	5.68984e-92	0.350368	0.000809868	413.992
		rs62420764	C	T	0.018973	0.002874	4.21017e-11	0.140365	8.6871e-05	43.5809
		rs62473720	G	A	0.014247	0.002136	2.63998e-11	0.317118	8.7911e-05	44.488
		rs62539154	A	G	0.027464	0.003402	7.19946e-16	0.097259	0.00013245	65.1714
		rs634534	G	A	0.032917	0.001998	5.83042e-61	0.542475	0.000537855	271.424
		rs637064	T	C	0.024251	0.001994	5.43e-34	0.556128	0.00029035	147.913
		rs6496717	T	C	0.018867	0.00232	4.41977e-16	0.759996	0.000129857	66.1345
		rs6540985	G	A	-0.019563	0.002141	6.72048e-20	0.31934	0.000166374	83.4902
		rs6556313	G	A	0.019467	0.002102	2.16023e-20	0.332338	0.000168176	85.7691
		rs6573020	T	C	0.020574	0.002019	2.30994e-24	0.433436	0.000207894	103.84
		rs6723466	T	C	-0.019559	0.002299	1.89017e-17	0.753192	0.000142229	72.3792
		rs6731125	C	T	0.017166	0.002002	1.03992e-17	0.564761	0.000144864	73.5205
		rs6750754	G	T	-0.063977	0.002243	8.35603e-179	0.264203	0.00159138	813.556
		rs6787336	A	G	0.036335	0.002238	3.29003e-59	0.287462	0.00054084	263.59
		rs6904506	C	T	-0.05238	0.003544	2.25009e-49	0.088477	0.000442547	218.445
		rs6924387	G	A	0.016659	0.002027	2.18978e-16	0.410173	0.000134283	67.5443
		rs6930635	C	T	-0.037712	0.003739	6.82967e-24	0.078494	0.000205742	101.729
		rs6956283	T	C	-0.01568	0.002237	2.48028e-12	0.732752	9.62927e-05	49.1313
		rs6971710	A	G	0.028325	0.002475	2.74979e-30	0.201035	0.000257733	130.975
		rs6979947	G	A	0.013224	0.002242	3.74999e-09	0.266399	6.83515e-05	34.7899
		rs6986109	T	G	-0.016486	0.002181	4.24033e-14	0.704331	0.000113199	57.137
		rs6989099	C	T	-0.017763	0.002133	8.58025e-17	0.317295	0.000136697	69.3504
		rs699664	T	C	-0.015655	0.002102	1e-13	0.329576	0.000108303	55.4675
		rs7026022	C	A	0.012099	0.002045	3.38003e-09	0.377752	6.88176e-05	35.0034
		rs7080536	A	G	-0.043694	0.004952	1.17004e-18	0.043176	0.000157742	77.8539
		rs7123726	C	T	0.016914	0.002436	3.95003e-12	0.210494	9.50863e-05	48.2099
		rs7141943	G	A	0.015879	0.002038	7.00003e-15	0.394677	0.000120477	60.7066
		rs71429414	A	G	-0.018575	0.002496	1.02991e-13	0.196207	0.000108829	55.3817
		rs7158239	A	G	0.01556	0.002037	2.27982e-14	0.395176	0.000115736	58.3493
		rs71628184	T	C	0.021187	0.003449	8.31994e-10	0.094165	7.65786e-05	37.7356
		rs7173571	C	T	0.013979	0.001993	2.39994e-12	0.526604	9.74296e-05	49.1967
		rs725613	G	T	-0.047446	0.002071	4.77529e-116	0.355982	0.00103218	524.852
		rs7257	A	G	0.033603	0.002002	3.59998e-63	0.567153	0.000554397	281.725
		rs72695582	A	G	-0.050092	0.005908	2.39994e-17	0.02972	0.000144715	71.8876
		rs72766638	A	C	-0.024311	0.002673	9.94031e-20	0.164331	0.000162327	82.7191
		rs72834751	T	C	-0.071743	0.009325	1.50003e-14	0.01273	0.000129376	59.1915
		rs72987040	A	C	-0.021632	0.00298	4.07005e-13	0.126171	0.000103183	52.6937
		rs73049239	A	G	-0.028898	0.004255	1.16011e-11	0.059098	9.28716e-05	46.1248
		rs73118830	C	T	-0.029368	0.003538	1.07994e-16	0.08553	0.000134917	68.9019
		rs73176183	C	T	-0.019559	0.002988	6.10942e-11	0.125715	8.40937e-05	42.848
		rs73187852	T	C	0.018395	0.002228	1.57e-16	0.275357	0.000135036	68.1659
		rs73191842	G	T	0.053919	0.006882	4.90004e-15	0.021394	0.000121734	61.3836
		rs73205140	C	T	0.037235	0.003255	2.91005e-30	0.104781	0.000260103	130.858
		rs73232881	C	T	0.067388	0.002418	8.22243e-171	0.213178	0.0015234	776.695
		rs73238201	T	C	-0.016486	0.002573	1.51999e-10	0.179352	8.00062e-05	41.0534
		rs73272842	A	G	-0.025354	0.003019	4.83949e-17	0.122779	0.00013847	70.5285
		rs7327960	C	T	0.017659	0.002629	1.90985e-11	0.826621	8.93851e-05	45.1179
		rs73322872	T	C	0.014569	0.002327	3.91003e-10	0.241917	7.78525e-05	39.1981
		rs73428834	T	C	0.029847	0.003774	2.72019e-15	0.074788	0.000123283	62.5455
		rs7354779	C	T	0.017686	0.002236	2.71019e-15	0.271434	0.000123715	62.5625
		rs73963711	T	C	0.022097	0.002465	3.2802e-19	0.210821	0.000162475	80.3583
		rs7423615	T	C	0.023183	0.002529	5.10035e-20	0.187322	0.000163635	84.031
		rs743002	C	T	-0.058857	0.00403	2.90001e-48	0.065649	0.000424976	213.297
		rs7441808	G	A	0.013917	0.002161	1.22e-10	0.301163	8.15265e-05	41.4744
		rs74480102	A	G	-0.083018	0.00494	2.52e-63	0.042751	0.000564087	282.416
		rs746550	T	C	0.023016	0.002342	9.03025e-23	0.235899	0.000190971	96.5793
		rs7569084	T	C	0.018707	0.002006	1.18987e-20	0.584311	0.000170001	86.965
		rs7593992	C	T	0.03047	0.002346	1.51985e-38	0.768386	0.00033046	168.689
		rs7636495	A	G	-0.024041	0.002591	1.83992e-20	0.180819	0.000171222	86.0931
		rs7646283	T	C	0.025996	0.002063	2.33024e-36	0.367733	0.000314251	158.786
		rs7646695	T	C	0.017597	0.002617	1.82012e-11	0.17966	9.12751e-05	45.2135
		rs76474320	C	T	0.028033	0.003728	5.7597e-14	0.077422	0.000112263	56.5439
		rs76793172	T	C	-0.041676	0.003436	8.07049e-34	0.091583	0.000289003	147.117
		rs7687708	G	T	-0.014708	0.002434	1.55998e-09	0.219981	7.42382e-05	36.5144
		rs7700687	T	C	0.040023	0.002035	4.81948e-86	0.617223	0.000756898	386.802
		rs778756	G	A	-0.015959	0.002001	1.57e-15	0.579738	0.000124106	63.6085
		rs7797428	T	C	0.012392	0.001999	5.85006e-10	0.469244	7.64903e-05	38.4287
		rs7840212	T	C	-0.040204	0.00211	7.1105e-81	0.336961	0.000722249	363.054
		rs7868130	T	C	0.03239	0.002269	3.34965e-46	0.258801	0.000402488	203.775
		rs7897422	C	T	0.020768	0.002521	1.85012e-16	0.192058	0.000133854	67.8644
		rs79716587	A	G	-0.024455	0.003003	3.99025e-16	0.126529	0.000132192	66.3167
		rs7986796	T	G	0.024263	0.002058	4.91021e-32	0.6277	0.000275147	138.994
		rs79881201	T	C	0.040325	0.002063	4.71954e-85	0.35982	0.000749145	382.075
		rs8	T	C	0.021919	0.002545	7.62957e-18	0.204252	0.000156176	74.1761
		rs80054178	C	T	-0.081789	0.006746	8.57038e-34	0.022394	0.000292897	146.993
		rs80066203	T	C	-0.024133	0.003931	8.53002e-10	0.067935	7.37552e-05	37.689
		rs8012643	T	C	0.015461	0.002194	1.90985e-12	0.286432	9.77152e-05	49.6592
		rs8020739	T	G	0.02471	0.002087	2.5698e-32	0.64383	0.00028003	140.184
		rs8044920	T	C	0.012096	0.002048	3.58996e-09	0.376333	6.86813e-05	34.8836
		rs8050508	T	C	0.034941	0.005716	1.01e-09	0.030896	7.31094e-05	37.3667
		rs8076052	C	A	-0.018335	0.00218	4.33012e-17	0.296433	0.000140224	70.7371
		rs8108623	A	C	0.017826	0.002165	1.90985e-16	0.625378	0.000148893	67.7938
		rs8142080	T	G	-0.023763	0.003295	5.72005e-13	0.102316	0.000103729	52.0104
		rs884634	C	T	0.012422	0.002012	6.82999e-10	0.415032	7.4925e-05	38.1176
		rs900382	T	C	-0.050934	0.006129	1e-16	0.027281	0.000137687	69.0613
		rs911603	A	C	-0.024681	0.002043	1.42004e-33	0.40355	0.000293242	145.944
		rs9349322	C	A	0.022029	0.002803	4.04017e-15	0.146915	0.00012164	61.7649
		rs9389268	G	A	-0.045367	0.002292	3.68978e-87	0.2561	0.000784213	391.786
		rs9392525	C	T	0.01321	0.002024	6.95024e-11	0.57553	8.5261e-05	42.5974
		rs962993	T	C	-0.040434	0.002009	4.9204e-90	0.422478	0.000797804	405.072
		rs9675999	A	G	0.016403	0.002057	1.59001e-15	0.626697	0.000125891	63.5881
		rs9709216	G	T	0.018123	0.002187	1.21004e-16	0.486768	0.000164107	68.669
		rs9815874	T	C	0.028359	0.002157	1.93019e-39	0.299538	0.00033748	172.854
		rs9818987	T	C	0.013608	0.002151	2.59998e-10	0.305904	7.86363e-05	40.0227
		rs9835307	C	T	0.026306	0.002187	2.6903e-33	0.658298	0.000311322	144.681
		rs9872485	G	T	-0.018354	0.00269	9.25977e-12	0.164017	9.238e-05	46.5538
		rs9939774	T	C	-0.029236	0.00202	1.98016e-47	0.404524	0.000411789	209.475
		rs9979383	T	C	0.028371	0.002067	8.00018e-43	0.629829	0.000375322	188.394
Lymphocyte	P<1e-09, r2<0.001 in 10000 kb	rs1000329	T	C	-0.082387	0.002111	1e-200	0.676463	0.00297109	1523.14
		rs1002607	C	T	-0.012987	0.001934	1.93019e-11	0.592852	8.14228e-05	45.0924
		rs10027415	T	C	-0.016333	0.001366	6.32995e-33	0.529463	0.00013292	142.965
		rs10076701	C	T	-0.022827	0.001907	5.5195e-33	0.55724	0.000257121	143.283
		rs10138752	T	C	-0.029776	0.003547	4.8899e-17	0.077325	0.000126512	70.4707
		rs1017875	T	C	-0.036085	0.002353	5.00956e-53	0.201673	0.000419288	235.184
		rs10179705	A	G	-0.021301	0.002079	1.29003e-24	0.294374	0.000188497	104.976
		rs10237524	A	G	-0.019182	0.002008	1.3499e-21	0.330226	0.000162764	91.2554
		rs10245472	A	G	-0.015883	0.002483	1.64999e-10	0.176635	7.33777e-05	40.9176
		rs10269987	A	G	-0.017142	0.001921	4.82948e-19	0.574622	0.000143652	79.6281
		rs1043996	A	G	0.013372	0.002139	4.20998e-10	0.716638	7.26213e-05	39.0813
		rs10445308	T	C	-0.029968	0.001892	1.90985e-56	0.479095	0.000448256	250.883
		rs10466905	A	G	0.061958	0.00246	7.09578e-140	0.190033	0.00118174	634.341
		rs10480003	G	A	-0.013338	0.00193	4.9705e-12	0.44679	8.79437e-05	47.7601
		rs10494783	A	G	-0.054095	0.004268	8.94953e-37	0.051764	0.000287269	160.644
		rs1050979	G	A	0.024519	0.001898	3.97009e-38	0.525212	0.000299826	166.883
		rs10748526	C	T	0.01522	0.002339	7.87952e-11	0.793501	7.59145e-05	42.3416
		rs10762264	A	G	-0.020403	0.002032	1.05999e-23	0.680729	0.000180947	100.818
		rs10774624	A	G	-0.087786	0.001917	1e-200	0.514001	0.00385017	2097.03
		rs10794175	T	G	-0.021252	0.002001	2.49977e-26	0.416037	0.000219456	112.799
		rs10814138	A	C	-0.013683	0.00205	2.54976e-11	0.313929	8.06479e-05	44.5506
		rs10823631	G	A	-0.017011	0.002013	3.11028e-17	0.325475	0.000127059	71.4119
		rs10828725	T	G	-0.032062	0.001968	1.29003e-59	0.366094	0.000477121	265.417
		rs10838634	G	A	-0.026107	0.003192	2.99985e-16	0.901514	0.000121029	66.8939
		rs10846577	C	T	-0.014107	0.001924	2.36974e-13	0.442146	9.81715e-05	53.7598
		rs10875371	T	C	-0.020825	0.001927	3.36977e-27	0.417813	0.000210982	116.79
		rs10932018	A	G	-0.0146	0.002118	5.64937e-12	0.729687	8.4089e-05	47.5173
		rs10956401	A	G	-0.025338	0.001992	5.0501e-37	0.345058	0.000290181	161.795
		rs10985915	G	A	-0.022597	0.003015	6.89922e-14	0.110633	0.000100484	56.1727
		rs11073903	A	G	-0.012696	0.001925	4.40961e-11	0.567498	7.91255e-05	43.4981
		rs11084096	A	G	-0.018376	0.002067	6.41948e-19	0.296205	0.00014079	79.035
		rs11134475	G	A	-0.014216	0.001962	4.41977e-13	0.635835	9.35896e-05	52.4995
		rs11160706	A	G	0.030499	0.002291	2.11982e-40	0.22222	0.000321545	177.223
		rs111626441	A	G	0.027778	0.003337	8.97016e-17	0.096614	0.000134693	69.2927
		rs11168249	C	T	-0.019487	0.00193	6.03949e-24	0.461347	0.000188737	101.947
		rs1118866	T	C	0.014779	0.002075	1.10002e-12	0.703532	9.11133e-05	50.7285
		rs11189058	A	G	0.012296	0.001995	7.31004e-10	0.660397	6.78163e-05	37.9875
		rs11218725	G	A	0.033008	0.001958	1.02991e-63	0.376523	0.000511541	284.192
		rs11224302	T	C	-0.0383	0.003174	1.72982e-33	0.098823	0.000261274	145.607
		rs112259268	A	C	-0.039446	0.005744	6.79047e-12	0.028328	8.56587e-05	47.1602
		rs112276394	T	C	-0.054785	0.005477	1.59001e-23	0.035142	0.000203537	100.054
		rs11231804	T	C	0.07386	0.012425	2.84997e-09	0.007228	7.82918e-05	35.3365
		rs11240335	T	C	0.029034	0.004035	6.48933e-13	0.066979	0.00010536	51.7756
		rs11247712	T	C	-0.019902	0.00196	3.37987e-24	0.368908	0.000184431	103.105
		rs113116201	C	T	0.041426	0.006895	1.93001e-09	0.019939	6.70706e-05	36.0974
		rs113142693	C	T	-0.017087	0.00222	1.46016e-14	0.247465	0.000108743	59.2412
		rs1132352	C	A	-0.023977	0.001895	1.15001e-36	0.538949	0.000285704	160.092
		rs113466616	A	G	0.012115	0.002012	1.78999e-09	0.333144	6.5214e-05	36.2568
		rs113513990	C	T	-0.037749	0.003208	6.36942e-32	0.097132	0.000249935	138.465
		rs113542380	A	G	-0.067528	0.003634	4.90004e-77	0.074926	0.000632131	345.3
		rs11505019	G	T	-0.013376	0.001918	3.1798e-12	0.410932	8.66199e-05	48.6355
		rs11541908	A	G	0.020421	0.002115	4.92947e-22	0.277246	0.000167124	93.2248
		rs11567701	T	G	0.054358	0.002147	2.39883e-141	0.261577	0.00114146	641.005
		rs11611710	C	A	-0.012727	0.002132	2.45002e-09	0.268727	6.36609e-05	35.6349
		rs11652968	T	C	-0.015917	0.002447	8.04081e-11	0.189963	7.79698e-05	42.311
		rs11657448	T	C	0.013211	0.002151	8.46993e-10	0.321926	7.61964e-05	37.7215
		rs116876036	T	C	0.020824	0.003402	9.56996e-10	0.09019	7.11652e-05	37.4678
		rs11688289	C	T	-0.014843	0.002405	6.98007e-10	0.18925	6.76077e-05	38.0901
		rs11706384	T	G	0.026978	0.002223	7.44046e-34	0.235888	0.000262369	147.278
		rs11712335	C	T	0.015222	0.002143	1.26009e-12	0.269338	9.11985e-05	50.4542
		rs11742873	T	C	-0.01661	0.002601	1.75001e-10	0.837406	7.51294e-05	40.7809
		rs117934175	A	G	-0.044564	0.004906	1.11995e-19	0.040534	0.000154471	82.511
		rs11800059	T	C	-0.025613	0.001882	3.87972e-42	0.509954	0.000327883	185.217
		rs11897252	T	C	-0.013906	0.002231	4.68997e-10	0.233523	6.9225e-05	38.8511
		rs12021809	A	G	-0.026344	0.003018	2.6903e-18	0.109842	0.000135715	76.1944
		rs12059564	T	C	0.016276	0.002646	7.95994e-10	0.150315	6.76684e-05	37.8368
		rs12088882	T	C	0.034026	0.001914	1.29987e-70	0.408499	0.000559498	316.036
		rs12127284	T	C	-0.016752	0.002089	1.10994e-15	0.710139	0.00011553	64.3065
		rs12133917	A	C	0.015624	0.001901	2.14981e-16	0.435692	0.000120036	67.5489
		rs12142033	A	G	-0.012976	0.002031	1.73002e-10	0.332829	7.47773e-05	40.8188
		rs1215	G	A	-0.022804	0.002705	3.67029e-17	0.144161	0.000128319	71.0699
		rs12330493	G	T	0.019277	0.001744	2.35993e-28	0.36489	0.000172234	122.176
		rs12336678	T	C	-0.021717	0.003163	6.82025e-12	0.099298	8.43629e-05	47.1411
		rs12463256	A	G	0.014581	0.00221	4.32016e-11	0.274793	8.47368e-05	43.53
		rs12526696	A	G	0.037387	0.002688	6.06038e-44	0.160592	0.00037685	193.455
		rs12586002	G	T	-0.013719	0.001984	4.86968e-12	0.352779	8.59469e-05	47.8145
		rs12593807	C	T	-0.020904	0.002793	7.57007e-14	0.135636	0.000102461	56.0164
		rs12598978	G	T	0.055094	0.001917	1.58125e-181	0.519622	0.00151534	825.967
		rs1260326	C	T	-0.02397	0.001925	1.44012e-35	0.602112	0.000275299	155.05
		rs12636926	C	T	-0.013632	0.002139	1.91999e-10	0.729623	7.33191e-05	40.6159
		rs12640189	T	C	0.016369	0.002605	3.40001e-10	0.175849	7.76642e-05	39.4845
		rs1264593	T	G	0.0146	0.001909	2.14981e-14	0.494948	0.000106569	58.4914
		rs12692735	T	G	-0.012472	0.001963	2.17e-10	0.361134	7.17762e-05	40.3673
		rs12745411	T	G	0.016574	0.00192	6.31975e-18	0.60014	0.000131839	74.5162
		rs12811832	A	G	-0.01621	0.002002	5.98963e-16	0.353889	0.000120163	65.5596
		rs1292069	C	T	-0.022504	0.001903	3.0903e-32	0.449582	0.00025064	139.843
		rs1297265	G	A	0.011767	0.00191	7.43995e-10	0.443092	6.83343e-05	37.9545
		rs12991188	G	A	0.013253	0.002003	3.76964e-11	0.598214	8.44325e-05	43.7789
		rs13040989	C	T	0.018955	0.002084	9.96093e-20	0.291865	0.000148517	82.7276
		rs13105987	A	G	0.045686	0.002118	3.63915e-103	0.274165	0.000830704	465.278
		rs13133642	C	T	0.066249	0.002022	1e-200	0.680761	0.00190765	1073.48
		rs13199519	A	G	-0.014087	0.002146	5.37032e-11	0.298486	8.3105e-05	43.0899
		rs1320472	C	T	-0.013729	0.001941	1.57e-12	0.461204	9.36753e-05	50.0294
		rs13276352	C	T	0.013969	0.002332	2.15001e-09	0.208845	6.44832e-05	35.8816
		rs1344603	C	T	0.029335	0.002022	1.18987e-47	0.67571	0.000377134	210.479
		rs1371076	C	T	0.014929	0.002153	4.21988e-12	0.740378	8.56814e-05	48.0808
		rs1384804	A	C	-0.050249	0.002188	1.07895e-116	0.748054	0.000951755	527.422
		rs1399180	C	T	0.025838	0.002529	1.82012e-24	0.828961	0.000189312	104.38
		rs139974673	C	T	0.054097	0.005994	1.89017e-19	0.026033	0.000148404	81.4538
		rs140763487	T	C	-0.048897	0.007981	9.25998e-10	0.01433	6.75417e-05	37.536
		rs141801008	T	C	-0.061427	0.010349	3.01002e-09	0.009564	7.14849e-05	35.2306
		rs1431545	T	C	0.021141	0.002045	5.0501e-25	0.653307	0.000202462	106.872
		rs1448318	A	G	0.017849	0.001949	5.49035e-20	0.614888	0.000150883	83.8692
		rs145719494	G	A	-0.030887	0.004077	3.71022e-14	0.058785	0.000105569	57.3942
		rs148601577	G	A	-0.048791	0.00702	3.78966e-12	0.019608	9.15256e-05	48.3063
		rs1491765	A	G	-0.017265	0.002093	1.66994e-16	0.293219	0.000123549	68.0445
		rs1493694	T	C	0.020046	0.003045	4.77969e-11	0.10785	7.73292e-05	43.339
		rs149453951	T	C	0.048621	0.006697	4.04017e-13	0.023606	0.000108975	52.7091
		rs149984502	T	C	0.047879	0.007054	1.18005e-11	0.018609	8.37308e-05	46.0699
		rs1533065	T	C	0.01668	0.001987	4.94994e-17	0.345231	0.000125782	70.4684
		rs1533298	T	C	0.030959	0.002089	1.18987e-49	0.715263	0.000390403	219.632
		rs16986308	A	G	-0.032274	0.002955	9.94947e-28	0.116161	0.000213879	119.286
		rs17005891	A	G	-0.024312	0.001766	4.42996e-43	0.184405	0.000177795	189.521
		rs17041439	C	A	0.040938	0.004104	2.11009e-23	0.056517	0.00017873	99.5032
		rs17055818	C	T	-0.029726	0.002177	2.14981e-42	0.252258	0.000333349	186.447
		rs17093026	T	C	-0.021868	0.003134	3.12968e-12	0.101478	8.72065e-05	48.6876
		rs17116384	G	A	0.012758	0.002044	4.49997e-10	0.316967	7.04776e-05	38.9585
		rs17229044	T	C	-0.019172	0.002326	1.77992e-16	0.210111	0.000122006	67.9382
		rs17366643	C	T	0.014557	0.001889	1.3499e-14	0.537795	0.000105348	59.3852
		rs175714	C	T	0.026141	0.00193	9.20026e-42	0.577477	0.000333472	183.454
		rs17608972	A	G	0.017924	0.00289	5.77006e-10	0.122961	6.92925e-05	38.4656
		rs17710008	A	G	0.020604	0.002451	4.45041e-17	0.18168	0.00012623	70.6667
		rs1822534	G	A	-0.034408	0.001932	7.21938e-71	0.393993	0.000565347	317.178
		rs187856913	A	G	0.048221	0.005006	6.24022e-22	0.038815	0.000173504	92.7874
		rs1883801	G	A	-0.017015	0.002443	3.39e-12	0.195421	9.10403e-05	48.5082
		rs1893033	T	C	-0.028193	0.003607	5.70033e-15	0.074578	0.000109714	61.0926
		rs1893592	C	A	0.014656	0.002084	2.1301e-12	0.295994	8.952e-05	49.4577
		rs1933295	G	A	-0.013819	0.002272	1.22e-09	0.776878	6.62031e-05	36.9943
		rs1967115	A	G	0.016769	0.001955	1.03992e-17	0.629389	0.000131184	73.5731
		rs1991431	A	G	0.023776	0.001903	8.91046e-36	0.440507	0.000278647	156.098
		rs2055101	T	C	-0.013407	0.001901	1.83992e-12	0.527164	8.96086e-05	49.739
		rs2057340	G	A	0.013805	0.001995	4.66015e-12	0.65339	8.6321e-05	47.8834
		rs2065500	G	A	-0.04804	0.002582	3.29003e-77	0.159764	0.000619607	346.172
		rs2089979	G	A	-0.034539	0.001922	4.10015e-72	0.414403	0.00057899	322.932
		rs2100139	C	T	0.015201	0.00199	2.32006e-14	0.65839	0.000103941	58.3494
		rs2180369	C	T	0.020125	0.003138	1.47001e-10	0.110884	7.986e-05	41.1305
		rs2230604	T	C	0.030004	0.003451	3.65006e-18	0.084354	0.000139066	75.5904
		rs2270968	G	T	-0.012829	0.002149	2.45997e-09	0.738399	6.35837e-05	35.6378
		rs2273215	A	G	-0.014956	0.001984	5.03965e-14	0.458202	0.000111059	56.8258
		rs2282718	A	G	-0.017559	0.002016	3.25012e-18	0.372092	0.000144071	75.8607
		rs2291900	A	G	0.016877	0.002114	1.49005e-15	0.29054	0.000117423	63.7351
		rs2294081	C	T	0.015641	0.002013	8.30042e-15	0.480733	0.000122139	60.3726
		rs2294630	G	A	0.012992	0.001899	8.1508e-12	0.493105	8.438e-05	46.8059
		rs2294861	T	C	0.019028	0.002069	3.83972e-20	0.294117	0.000150338	84.5792
		rs2298979	A	G	-0.019569	0.001926	3.19963e-24	0.405953	0.000184699	103.234
		rs2313532	A	G	-0.014305	0.001943	1.86982e-13	0.40082	9.82907e-05	54.2036
		rs2327531	G	A	0.016613	0.002328	9.92887e-13	0.20699	9.06054e-05	50.9247
		rs2412544	T	C	-0.016169	0.001949	1.13006e-16	0.393588	0.000124798	68.8242
		rs2453582	T	C	0.017742	0.001989	4.87978e-19	0.391346	0.000149957	79.5672
		rs2462017	A	G	0.013995	0.002002	2.87012e-12	0.652335	8.88398e-05	48.867
		rs2476601	G	A	0.054421	0.003132	1.46994e-67	0.899687	0.000534579	301.917
		rs247826	T	C	0.038651	0.002294	1.18987e-63	0.220693	0.000513864	283.879
		rs251391	T	C	0.019773	0.002179	1.21004e-19	0.747429	0.000147614	82.3434
		rs251398	C	T	-0.017302	0.001922	2.39001e-19	0.446922	0.000147993	81.0372
		rs2542573	C	T	-0.014819	0.002005	1.51985e-13	0.330988	9.72555e-05	54.627
		rs2548256	T	G	0.014003	0.001946	6.48933e-13	0.62009	9.23863e-05	51.7791
		rs2548499	G	A	0.018985	0.002326	3.4898e-16	0.208194	0.000118833	66.6193
		rs2569693	T	C	-0.042002	0.002018	3.3597e-96	0.384414	0.000834945	433.207
		rs2665960	G	A	0.012196	0.002071	4.02995e-09	0.668615	6.59134e-05	34.6795
		rs2710804	C	T	0.013802	0.001953	1.63005e-12	0.376124	8.94012e-05	49.9434
		rs2727487	C	A	-0.012631	0.001955	1.07999e-10	0.629239	7.44415e-05	41.7427
		rs2738783	G	T	-0.015649	0.00243	1.24e-10	0.78963	8.13599e-05	41.4724
		rs2755253	T	C	-0.030903	0.002072	2.87012e-50	0.70898	0.000394083	222.444
		rs2807303	A	G	0.021641	0.001999	2.78997e-27	0.346234	0.00021202	117.2
		rs28533432	T	C	-0.025074	0.002098	7.16968e-33	0.699647	0.000264234	142.835
		rs28710104	G	A	-0.014333	0.002031	1.74985e-12	0.683305	8.89119e-05	49.8027
		rs28853644	T	C	-0.024344	0.002132	3.76964e-30	0.271343	0.000234345	130.379
		rs2980821	A	C	-0.013245	0.001916	4.9705e-12	0.425051	8.57441e-05	47.7872
		rs2980888	C	T	-0.01534	0.002067	1.21004e-13	0.697079	9.93784e-05	55.0767
		rs2992263	A	G	-0.020286	0.001941	1.58016e-25	0.610009	0.0001958	109.23
		rs309375	A	C	0.019206	0.001951	7.83971e-23	0.574699	0.000180319	96.9076
		rs3136685	T	C	-0.020315	0.002708	6.51028e-14	0.16434	0.000113354	56.2775
		rs332507	C	T	-0.01527	0.002298	3.12033e-11	0.222163	8.05876e-05	44.1546
		rs34025077	G	A	-0.032806	0.003133	1.24997e-25	0.101398	0.000196125	109.644
		rs34030812	C	T	-0.018195	0.001956	1.49005e-20	0.367406	0.000153888	86.5296
		rs34229224	A	G	-0.047882	0.008049	2.78003e-09	0.014131	6.38803e-05	35.3882
		rs34327	C	T	-0.025891	0.001907	5.91017e-42	0.523078	0.000334458	184.329
		rs34487722	C	T	0.021496	0.00259	1.08993e-16	0.159216	0.000123713	68.8833
		rs34850939	A	G	0.048075	0.002086	1.6293e-117	0.346116	0.00104614	531.139
		rs35001362	A	C	-0.015094	0.002236	1.51985e-11	0.23581	8.21112e-05	45.5684
		rs35114152	G	A	0.024676	0.00227	1.72982e-27	0.225583	0.000212746	118.167
		rs35121828	A	G	0.013147	0.002162	1.22e-09	0.258961	6.63374e-05	36.9777
		rs35186877	A	G	0.031862	0.002332	1.93999e-42	0.213822	0.00034131	186.675
		rs360017	G	A	-0.021106	0.002273	1.69005e-20	0.775253	0.000155231	86.2207
		rs36084354	A	G	-0.060717	0.003409	6.59933e-71	0.091708	0.000614163	317.223
		rs3735485	G	A	0.044361	0.002643	3.55959e-63	0.844816	0.000515991	281.713
		rs3739756	C	T	-0.031845	0.005047	2.87998e-10	0.036302	7.09552e-05	39.812
		rs3760456	T	C	-0.01472	0.001911	1.39991e-14	0.439121	0.000106733	59.3325
		rs3761846	T	C	0.020501	0.001907	6.26037e-27	0.569525	0.000206082	115.571
		rs3810818	C	A	-0.018248	0.002353	9.13061e-15	0.773356	0.00011673	60.143
		rs3812849	C	A	0.04349	0.002142	1.32008e-91	0.266158	0.000738841	412.229
		rs41267765	T	C	-0.046076	0.006484	1.23994e-12	0.021741	9.03052e-05	50.4966
		rs41317270	T	C	-0.018469	0.002479	9.81974e-14	0.177256	9.94907e-05	55.505
		rs419470	G	A	0.014977	0.002097	9.49948e-13	0.716626	9.11029e-05	51.0095
		rs4319365	A	G	-0.01934	0.001904	3.25987e-24	0.544871	0.000185512	103.176
		rs4411786	C	T	-0.045103	0.002147	6.38999e-98	0.265295	0.000793018	441.311
		rs444613	G	A	0.015352	0.001911	1e-15	0.42489	0.000115183	64.5367
		rs4530278	T	G	0.017139	0.00198	5.23962e-18	0.598216	0.000141206	74.9271
		rs45528934	T	C	-0.020532	0.00258	1.85012e-15	0.161765	0.000114325	63.3317
		rs4619033	G	A	-0.019043	0.002139	5.7306e-19	0.267859	0.000142233	79.2588
		rs464609	A	G	0.011801	0.001899	5.30005e-10	0.544347	6.9084e-05	38.6177
		rs4660128	C	T	-0.024767	0.003138	3.12033e-15	0.896961	0.000113384	62.293
		rs4671238	T	C	-0.013596	0.001907	1.05003e-12	0.560317	9.10806e-05	50.8299
		rs4696314	C	T	0.014209	0.001906	9.33039e-14	0.515076	0.000100856	55.575
		rs4718976	C	T	-0.017869	0.002085	1.10002e-17	0.694537	0.000135483	73.4491
		rs4737010	A	G	0.026819	0.002264	2.47002e-32	0.228863	0.000253876	140.324
		rs4760278	A	C	-0.014029	0.002269	6.47993e-10	0.222685	6.81352e-05	38.2281
		rs4789294	G	A	0.02652	0.002301	1.05003e-30	0.219391	0.000240896	132.835
		rs4805881	C	A	-0.015028	0.00203	1.40994e-13	0.665288	0.00010058	54.8035
		rs4833031	C	T	0.017943	0.002737	5.70033e-11	0.139012	7.70672e-05	42.9773
		rs4849169	C	A	0.020898	0.0019	4.14e-28	0.482168	0.000218085	120.976
		rs4869745	T	C	0.012563	0.002081	1.61002e-09	0.28937	6.49103e-05	36.4452
		rs4880192	G	A	0.029356	0.002198	1.16011e-40	0.720804	0.000346857	178.376
		rs4940572	A	G	0.023283	0.002808	1.17004e-16	0.136477	0.000127774	68.7515
		rs494091	C	T	0.02706	0.001901	6.35038e-46	0.425556	0.000358006	202.623
		rs4948492	T	C	-0.021918	0.001998	5.68984e-28	0.661671	0.000215087	120.34
		rs4972950	A	C	0.021567	0.003043	1.42004e-12	0.107585	8.93158e-05	50.2312
		rs4987855	T	C	-0.024077	0.003242	1.16011e-13	0.096307	0.000100905	55.154
		rs501461	T	G	-0.017739	0.001941	6.75927e-20	0.599659	0.000151085	83.5229
		rs5026470	G	A	0.036884	0.001892	1.45011e-84	0.517317	0.000679399	380.042
		rs529002	G	T	-0.011348	0.001933	4.45995e-09	0.550891	6.37215e-05	34.4646
		rs533483	A	G	-0.014327	0.002238	1.58001e-10	0.244075	7.5743e-05	40.9816
		rs55724912	A	G	-0.014372	0.002011	9.21934e-13	0.36502	9.57505e-05	51.075
		rs55851824	A	G	0.020109	0.002562	4.37019e-15	0.161944	0.000109761	61.6057
		rs55977949	A	G	-0.030462	0.003183	1.15001e-21	0.097555	0.000163387	91.5887
		rs55982282	A	G	0.061557	0.002764	8.70964e-110	0.135291	0.000886592	495.995
		rs56094005	G	A	-0.040102	0.004704	1.6099e-17	0.042917	0.000132112	72.6768
		rs56252104	T	C	0.018921	0.002172	3.12033e-18	0.260661	0.000137987	75.8869
		rs56850780	T	G	-0.02142	0.003625	3.55001e-09	0.077731	6.57841e-05	34.9157
		rs5758452	A	G	-0.027039	0.002345	9.91973e-31	0.79346	0.00023963	132.952
		rs58265751	C	T	-0.012247	0.001914	1.61002e-10	0.52078	7.4865e-05	40.9425
		rs58408429	C	T	-0.023618	0.002428	2.41991e-22	0.186094	0.000168975	94.6209
		rs58667319	T	C	-0.02322	0.00289	9.9106e-16	0.122978	0.000116303	64.5546
		rs59543294	C	T	0.01921	0.003058	3.46003e-10	0.106928	7.04795e-05	39.4619
		rs5998509	T	C	-0.040865	0.002471	2.18978e-61	0.188334	0.000510551	273.499
		rs6021231	C	T	-0.011461	0.001915	2.20999e-09	0.470967	6.54558e-05	35.8184
		rs603424	A	G	0.020453	0.002498	2.77971e-16	0.174511	0.000120525	67.039
		rs60633358	C	T	-0.02173	0.00279	7.18952e-15	0.131836	0.00010809	60.661
		rs6063965	A	G	0.022749	0.002999	3.46019e-14	0.113732	0.000104328	57.54
		rs6072080	T	C	0.019842	0.001942	1.77011e-24	0.585279	0.000191126	104.393
		rs607465	G	A	0.034284	0.003842	4.82948e-19	0.065545	0.000143983	79.6281
		rs6103270	G	A	-0.013672	0.002275	1.90999e-09	0.226397	6.54761e-05	36.116
		rs611847	G	A	0.014579	0.002003	3.53021e-13	0.635502	9.84685e-05	52.9776
		rs61387190	T	C	0.031603	0.0026	5.81032e-34	0.157437	0.000264969	147.743
		rs61750929	T	C	-0.070296	0.004108	1.35988e-65	0.056331	0.000525362	292.819
		rs61778219	T	C	0.023251	0.002746	2.66993e-17	0.140899	0.000130878	71.6936
		rs61850684	A	G	-0.032458	0.002245	2.59e-47	0.233502	0.000377116	209.03
		rs61867141	A	G	-0.017128	0.002531	1.36994e-11	0.194944	9.2083e-05	45.796
		rs62091998	G	A	-0.022325	0.002049	1.33015e-27	0.307469	0.000212253	118.713
		rs62334097	G	A	-0.018812	0.002993	3.38003e-10	0.112515	7.06759e-05	39.5053
		rs62389639	G	A	0.017946	0.002675	2.03002e-11	0.165938	8.91476e-05	45.0076
		rs62396356	G	A	-0.016421	0.002787	3.92004e-09	0.133651	6.24445e-05	34.7155
		rs62565782	A	G	-0.021628	0.002855	3.74973e-14	0.130865	0.000106408	57.3877
		rs62621812	A	G	0.055993	0.006836	2.73023e-16	0.020688	0.000127039	67.0906
		rs631864	C	T	0.013864	0.001958	1.48013e-12	0.471706	9.57975e-05	50.136
		rs6445826	C	T	0.019885	0.001931	7.68069e-25	0.498133	0.000197704	106.044
		rs6474359	C	T	-0.051371	0.005006	1.13006e-24	0.037682	0.00019139	105.306
		rs6487543	A	G	0.019723	0.002284	6.20012e-18	0.770994	0.000137364	74.5679
		rs6502555	C	T	0.028939	0.002252	9.25977e-38	0.269464	0.000329716	165.131
		rs6546881	T	C	0.012654	0.001992	2.17e-10	0.657162	7.21518e-05	40.353
		rs6554158	A	G	0.014203	0.00224	2.34002e-10	0.231214	7.1715e-05	40.2034
		rs6586777	A	C	-0.01282	0.001906	1.79019e-11	0.437803	8.09046e-05	45.2406
		rs6700896	T	C	-0.017362	0.001939	3.67029e-19	0.378957	0.000141887	80.1756
		rs6721663	A	G	-0.026133	0.0026	9.83105e-24	0.158697	0.00018236	101.025
		rs6742799	C	A	-0.039239	0.002357	3.53997e-62	0.199766	0.000492271	277.15
		rs6743068	G	A	0.031438	0.002125	1.69005e-49	0.729732	0.00038985	218.872
		rs67483792	T	C	-0.035358	0.00473	8.05935e-14	0.042874	0.000102605	55.8794
		rs67516712	A	G	0.014929	0.001925	9.10961e-15	0.422528	0.000108762	60.1448
		rs6755786	T	C	0.026573	0.002252	4.19952e-32	0.773393	0.000247505	139.233
		rs6755895	C	T	-0.023423	0.002291	1.65006e-24	0.230958	0.000194894	104.528
		rs678393	G	T	-0.015416	0.002196	2.32006e-12	0.261711	9.18379e-05	49.2807
		rs6808949	C	T	0.022715	0.003046	9.1601e-14	0.11098	0.000101815	55.6114
		rs6809697	A	G	-0.018203	0.002796	7.74997e-11	0.136362	7.80443e-05	42.3848
		rs6926219	A	G	0.026814	0.001896	2.22998e-45	0.547273	0.000356282	200.007
		rs6955702	G	A	-0.022276	0.001916	3.3597e-31	0.522122	0.000247624	135.17
		rs696	T	C	0.025359	0.001966	4.93969e-38	0.364762	0.000298016	166.378
		rs6966893	A	G	0.018708	0.002471	3.91021e-14	0.178557	0.000102669	57.3202
		rs7007986	A	G	-0.022001	0.002012	8.49963e-28	0.601181	0.000232111	119.571
		rs703257	T	C	-0.021058	0.003029	3.71022e-12	0.888204	8.8065e-05	48.3319
		rs7071131	G	A	-0.016035	0.001968	3.85035e-16	0.495115	0.000128548	66.3874
		rs707833	A	G	0.015021	0.001969	2.51015e-14	0.636292	0.000104433	58.1975
		rs7093481	G	A	-0.016588	0.002053	6.84069e-16	0.307178	0.00011712	65.2843
		rs71318973	T	G	-0.015452	0.002253	7.28954e-12	0.240872	8.73174e-05	47.0376
		rs7138945	G	T	0.012262	0.001966	4.62999e-10	0.363488	6.95744e-05	38.9004
		rs714027	G	A	-0.034906	0.001905	5.95937e-75	0.552066	0.000602608	335.744
		rs71420836	T	C	0.030214	0.003343	1.66994e-19	0.097097	0.000160064	81.6849
		rs71536554	C	T	-0.04912	0.003681	1.38007e-40	0.154307	0.000629717	178.067
		rs7161799	T	C	0.034112	0.0036	2.78997e-21	0.076225	0.000163873	89.7858
		rs7192652	G	A	0.022219	0.001915	4.32016e-31	0.480623	0.000246471	134.62
		rs721131	C	T	-0.018902	0.00203	1.35988e-20	0.31956	0.000155377	86.7005
		rs721377	T	C	0.019951	0.003209	5.22998e-10	0.102169	7.30253e-05	38.6534
		rs7252565	A	G	0.027591	0.002536	1.54989e-27	0.787553	0.000254739	118.368
		rs7254517	A	G	0.029033	0.002022	1.05003e-46	0.384999	0.000399162	206.167
		rs72634819	T	C	-0.014315	0.002296	4.67003e-10	0.263613	7.95583e-05	38.872
		rs72740550	A	G	-0.018732	0.002269	1.58016e-16	0.222059	0.000121231	68.155
		rs72835315	C	T	0.035058	0.004198	7.08925e-17	0.060241	0.00013916	69.7409
		rs72928038	A	G	-0.033322	0.002481	4.24033e-41	0.176926	0.000323387	180.388
		rs7308380	C	A	0.015969	0.00218	2.47002e-13	0.750511	9.54979e-05	53.6588
		rs73105786	A	G	-0.015227	0.002036	7.76068e-14	0.319436	0.000100812	55.9334
		rs7312770	T	C	0.012056	0.001909	2.80001e-10	0.505626	7.26644e-05	39.8835
		rs73142294	T	C	0.015158	0.002212	7.50931e-12	0.247603	8.56085e-05	46.9582
		rs73165514	A	G	0.020861	0.003359	5.47003e-10	0.086367	6.86784e-05	38.5699
		rs73239280	A	G	-0.031522	0.002348	4.71954e-41	0.203256	0.000321825	180.231
		rs73961715	C	T	-0.04895	0.002823	2.78997e-67	0.127705	0.000533835	300.664
		rs74227709	A	G	-0.028903	0.00365	2.51015e-15	0.071527	0.000110957	62.7045
		rs74280151	T	C	0.028848	0.002226	2.22024e-38	0.174782	0.000240064	167.95
		rs74408817	A	C	-0.023367	0.003486	2.09991e-11	0.08075	8.1061e-05	44.9314
		rs74526869	A	G	0.034829	0.002856	3.59998e-34	0.125385	0.000266057	148.718
		rs74679312	G	A	0.031268	0.004262	2.27982e-13	0.056702	0.000104587	53.8235
		rs748113	C	T	-0.03428	0.002004	1.53003e-65	0.436258	0.00057801	292.607
		rs74911261	A	G	0.044672	0.005984	8.67961e-14	0.025691	9.9903e-05	55.7296
		rs75049211	T	C	-0.030705	0.004887	3.42003e-10	0.039779	7.20233e-05	39.4759
		rs7527389	G	A	-0.019326	0.001959	6.30957e-23	0.630568	0.000174012	97.3225
		rs7529794	T	G	0.016098	0.002151	7.57007e-14	0.26241	0.000100316	56.0095
		rs75628831	A	G	0.030433	0.003456	1.38007e-18	0.085709	0.000145154	77.5426
		rs75653581	T	C	0.061126	0.00886	5.45004e-12	0.012672	9.3495e-05	47.5974
		rs7596846	T	G	-0.02122	0.003547	2.27002e-09	0.920631	6.58048e-05	35.7904
		rs7617331	C	T	0.016015	0.00189	2.52e-17	0.530403	0.000127766	71.8007
		rs76428106	C	T	0.062814	0.008702	5.49035e-13	0.013444	0.000104663	52.1042
		rs7661349	C	T	0.02523	0.001961	7.87046e-38	0.63683	0.000294441	165.53
		rs768908	T	C	-0.020182	0.002877	2.39994e-12	0.124888	8.90313e-05	49.2093
		rs7696969	G	T	-0.012466	0.002023	7.36004e-10	0.619889	7.32333e-05	37.9718
		rs77265382	T	C	-0.033169	0.004662	1.17004e-12	0.045014	9.45887e-05	50.6196
		rs7757316	G	A	-0.04939	0.003516	8.69961e-45	0.078773	0.00035404	197.323
		rs7776054	G	A	-0.04014	0.00215	9.8107e-78	0.260832	0.000621282	348.559
		rs7780328	G	A	0.037325	0.003773	4.75007e-23	0.06709	0.000174392	97.8643
		rs77876222	T	C	0.044726	0.007065	2.53e-10	0.019648	7.70638e-05	40.0769
		rs7790229	A	G	0.012114	0.001896	1.71002e-10	0.492994	7.33601e-05	40.8222
		rs77954449	G	A	-0.036769	0.005678	9.77913e-11	0.028289	7.43273e-05	41.9345
		rs7802739	T	C	-0.022186	0.002331	1.85012e-21	0.793015	0.000161588	90.5882
		rs78058190	A	G	0.047272	0.00483	1.35988e-22	0.051732	0.000219244	95.7882
		rs78270096	A	G	-0.034471	0.003887	7.78933e-19	0.070435	0.000155599	78.6461
		rs7839516	C	T	0.015461	0.001959	3.08035e-15	0.369365	0.000111362	62.288
		rs78487935	G	A	-0.023648	0.00356	3.19963e-11	0.077712	8.01629e-05	44.1253
		rs7855586	G	A	0.014877	0.002086	1.02991e-12	0.290115	9.11631e-05	50.8628
		rs78976959	A	G	0.032841	0.004804	8.41008e-12	0.041092	8.49957e-05	46.7332
		rs78983078	A	G	-0.062374	0.009806	2.07e-10	0.009511	7.33015e-05	40.4596
		rs79237520	T	C	0.08538	0.006437	4.14e-40	0.022839	0.000325376	175.932
		rs79805393	C	T	0.017037	0.002503	1.03992e-11	0.173015	8.30611e-05	46.3301
		rs8004780	C	A	0.018324	0.001972	1.59993e-20	0.366436	0.000155905	86.3426
		rs8052370	T	C	-0.021027	0.002036	5.81969e-25	0.609467	0.000210471	106.659
		rs8075090	C	T	0.020988	0.001897	2.01002e-28	0.523681	0.000219754	122.407
		rs853198	C	A	-0.020396	0.001969	4.00037e-25	0.639646	0.000191774	107.299
		rs912416	C	A	-0.012011	0.001914	3.57998e-10	0.445384	7.12714e-05	39.3797
		rs9328393	A	C	0.0234	0.002021	5.73984e-31	0.668424	0.000242715	134.059
		rs9375486	T	C	-0.013808	0.001948	1.39991e-12	0.379599	8.98026e-05	50.2437
		rs949349	C	T	0.014189	0.002137	3.25987e-11	0.271122	7.95707e-05	44.0852
		rs9525619	T	C	-0.020294	0.001896	1.07994e-26	0.534266	0.000204956	114.566
		rs9532679	C	A	-0.032336	0.002704	6.32995e-33	0.148984	0.000265143	143.007
		rs9534338	C	T	0.015145	0.001895	1.38007e-15	0.459888	0.000113947	63.8732
		rs9592965	C	A	-0.014448	0.00202	8.8308e-13	0.326994	9.18764e-05	51.1577
		rs9605047	T	G	0.019972	0.002109	2.9902e-21	0.327768	0.000175776	89.6785
		rs9653415	G	A	-0.01475	0.002038	4.79954e-13	0.38569	0.000103096	52.381
		rs968478	G	A	0.014727	0.001938	3.11028e-14	0.397325	0.000103869	57.7457
		rs9835571	G	T	0.022014	0.002037	3.4898e-27	0.689834	0.00020738	116.792
		rs9864216	A	G	0.023706	0.002268	1.57e-25	0.776354	0.00019515	109.252
		rs9865811	A	G	0.01208	0.00206	4.62999e-09	0.301654	6.14814e-05	34.3873
		rs9898958	G	T	0.015551	0.002632	3.56e-09	0.153458	6.28325e-05	34.9095
		rs9906320	A	G	0.024622	0.002296	8.66962e-27	0.775113	0.000211352	115.001
		rs9920	C	T	0.02939	0.003092	2.14981e-21	0.104682	0.000161912	90.348
		rs9937837	G	T	-0.015089	0.002136	1.69005e-12	0.269678	8.96831e-05	49.9019
		rs9939124	T	C	-0.016734	0.002051	3.59998e-16	0.306976	0.000119147	66.5682
Memory B cell	P<5e-06, r2<0.01 in 10000 kb	rs11653761	T	G	-0.1161	0.02478	2.93799e-06	0.592	0.00651143	21.9394
		rs12874404	G	A	0.173	0.02661	9.13903e-11	0.3256	0.0131439	42.244
		rs144295598	A	G	0.6102	0.1207	4.46303e-07	0.0103	0.00759128	25.5442
		rs16867231	A	G	0.538	0.1157	3.44897e-06	0.0108	0.00618447	21.6103
		rs17708396	A	C	2.504	0.522	1.67699e-06	0.0005	0.00626688	22.998
		rs2879633	A	G	-0.1301	0.02775	2.84302e-06	0.2884	0.0069473	21.968
		rs557577736	G	A	1.829	0.3891	2.68701e-06	0.001	0.00668379	22.0835
		rs6492117	C	T	-0.1395	0.02499	2.57798e-08	0.4685	0.00969151	31.1443
		rs9614226	G	T	-0.4235	0.08713	1.22101e-06	0.9792	0.00730586	23.6121
Monocyte	P<1e-09, r2<0.001 in 10000 kb	rs1002774	A	G	-0.053992	0.002985	4.48023e-73	0.111651	0.000578276	327.166
		rs10094039	G	A	-0.091286	0.001924	1e-200	0.616642	0.00393982	2251.11
		rs10099546	G	A	-0.020315	0.002802	4.33012e-13	0.143315	0.000101339	52.5649
		rs10123018	A	G	0.075498	0.001889	1e-200	0.582145	0.00277305	1597.37
		rs1016680	C	A	-0.02553	0.001951	4.31023e-39	0.63682	0.000301488	171.232
		rs10197805	C	T	-0.041572	0.002564	4.70002e-59	0.15658	0.00045647	262.884
		rs10238435	T	C	-0.023569	0.002276	4.22961e-25	0.239724	0.000202486	107.235
		rs10403909	G	A	0.018742	0.002204	1.94984e-17	0.724302	0.000140286	72.3114
		rs10420703	C	T	0.018408	0.00249	1.49005e-13	0.808132	0.000105082	54.6528
		rs10460159	C	T	-0.015786	0.001899	9.88098e-17	0.428951	0.000122083	69.1023
		rs10478058	G	A	0.014834	0.002354	3.01002e-10	0.196989	6.96162e-05	39.7102
		rs10518329	G	A	-0.013729	0.001995	6.18016e-12	0.330665	8.34333e-05	47.3577
		rs10780209	A	G	0.045431	0.001865	5.68853e-131	0.479354	0.00103023	593.397
		rs10791827	A	C	0.011401	0.001871	1.13e-09	0.484997	6.49329e-05	37.131
		rs10796828	G	T	-0.017973	0.00195	3.25987e-20	0.635004	0.000149739	84.9513
		rs10814193	C	A	0.014748	0.002069	1.07004e-12	0.715571	8.85366e-05	50.8093
		rs10828725	T	G	-0.047265	0.002019	3.55631e-121	0.367802	0.00103891	548.031
		rs10849448	G	A	-0.050144	0.002236	2.76694e-111	0.753266	0.000934642	502.913
		rs10892342	C	T	-0.018109	0.002101	7.0194e-18	0.276119	0.000131094	74.2908
		rs10902106	C	T	0.013363	0.001888	1.53003e-12	0.540451	8.87005e-05	50.0959
		rs1091815	A	G	-0.01425	0.002263	3.14e-10	0.76516	7.29767e-05	39.6514
		rs10935473	T	G	0.025021	0.00188	2.29985e-40	0.441522	0.000308743	177.13
		rs10948314	G	A	-0.033579	0.003076	1.03992e-27	0.10293	0.000208225	119.168
		rs11057841	T	C	0.020359	0.002724	8.16018e-14	0.143569	0.000101929	55.8595
		rs11082397	G	T	0.018719	0.002766	1.35988e-11	0.128716	7.85937e-05	45.7993
		rs11102144	G	A	-0.016078	0.002505	1.43001e-10	0.166426	7.17232e-05	41.1952
		rs11104881	C	T	-0.015568	0.002051	3.34965e-14	0.702076	0.000101388	57.6146
		rs11130612	T	C	-0.012373	0.001985	4.70999e-10	0.334436	6.81527e-05	38.8532
		rs11155787	T	C	0.013538	0.001949	3.92013e-12	0.637971	8.4661e-05	48.2485
		rs11170652	A	G	-0.018075	0.002374	2.77013e-14	0.194716	0.000102456	57.9687
		rs11189154	A	G	0.050518	0.002145	1.25026e-122	0.255718	0.000971451	554.672
		rs11190141	T	C	-0.04368	0.001932	4.01791e-113	0.371953	0.000891406	511.151
		rs11191514	T	C	-0.027643	0.003465	1.54989e-15	0.079724	0.000112126	63.6447
		rs112248289	C	A	0.0221	0.00282	4.82948e-15	0.128726	0.000109556	61.4164
		rs11235689	T	C	-0.016087	0.001981	4.78961e-16	0.413912	0.00012556	65.9446
		rs11242109	T	G	-0.022463	0.001875	4.75007e-33	0.478171	0.000251812	143.526
		rs11246065	G	A	-0.022075	0.00207	1.59993e-26	0.339085	0.000218417	113.726
		rs11247908	A	G	-0.029245	0.002464	1.91999e-32	0.172916	0.000244635	140.871
		rs113015223	T	C	0.018546	0.002311	1.05999e-15	0.210935	0.000114496	64.4019
		rs113143864	T	C	0.034668	0.003669	3.60994e-21	0.070781	0.000158097	89.2813
		rs113172748	G	A	0.015703	0.002002	4.58987e-15	0.671034	0.000108866	61.5227
		rs113292043	T	C	-0.024784	0.003776	5.45004e-11	0.065718	7.54284e-05	43.0801
		rs1146933	C	T	-0.014028	0.002287	8.87994e-10	0.786362	6.61184e-05	37.6234
		rs11508026	T	C	-0.011946	0.00189	2.69998e-10	0.431325	7.00074e-05	39.9503
		rs115202835	A	G	0.027219	0.003757	4.5196e-13	0.067747	9.35833e-05	52.488
		rs115340020	A	G	-0.094321	0.005802	2.22024e-59	0.027188	0.000470601	264.277
		rs11557154	T	C	0.031988	0.002794	2.63998e-30	0.127576	0.000227772	131.075
		rs11590380	C	T	0.024736	0.002083	1.69005e-32	0.679418	0.000266542	141.019
		rs11602323	G	T	0.06519	0.002862	9.22571e-115	0.123096	0.000917462	518.825
		rs11641185	T	C	-0.015359	0.002125	5.06058e-13	0.731965	9.25631e-05	52.2404
		rs11644125	T	C	-0.019445	0.001921	4.73042e-24	0.597948	0.000181799	102.461
		rs116619972	A	G	-0.040259	0.005861	6.72977e-12	0.026454	8.34841e-05	47.1825
		rs11713343	A	G	-0.026259	0.002392	5.23962e-28	0.196605	0.000217826	120.513
		rs11723621	G	A	-0.013213	0.002061	1.47999e-10	0.290773	7.20066e-05	41.1003
		rs11792030	A	G	0.02217	0.003107	1e-12	0.103551	9.12518e-05	50.9152
		rs1180658	A	C	-0.012535	0.001945	1.19001e-10	0.633894	7.29293e-05	41.5344
		rs118083884	A	G	-0.096502	0.008517	1.00995e-29	0.016672	0.000305344	128.38
		rs11854390	T	C	0.04248	0.001892	1.25893e-111	0.562044	0.000888382	504.11
		rs11857609	C	T	0.023258	0.002198	3.99025e-26	0.759798	0.000197447	111.966
		rs12055642	C	T	0.018089	0.002337	1.03992e-14	0.199011	0.000104319	59.9115
		rs12118443	A	G	-0.018028	0.001863	4.00037e-22	0.489432	0.000162432	93.6414
		rs1212036	T	C	-0.017732	0.002942	1.72001e-09	0.113565	6.33048e-05	36.3269
		rs12144117	T	C	-0.014095	0.002289	7.62992e-10	0.215407	6.71528e-05	37.9173
		rs12147629	G	A	0.016563	0.002024	2.90001e-16	0.31157	0.000117686	66.9661
		rs12306790	T	C	0.019129	0.002066	2.22024e-20	0.714634	0.000149245	85.7279
		rs12327253	G	A	0.017782	0.002112	4.05042e-17	0.293564	0.00013115	70.8878
		rs12332674	G	T	-0.016504	0.002625	3.32997e-10	0.152382	7.03627e-05	39.5292
		rs12376511	C	T	-0.048585	0.002529	3.44033e-82	0.163934	0.000647059	369.067
		rs12461422	T	C	-0.016008	0.002202	3.76964e-13	0.283017	0.000103998	52.8491
		rs12480462	T	C	-0.030991	0.00203	1.44012e-52	0.31601	0.000415195	233.065
		rs12480732	T	C	0.054282	0.002188	8.57038e-136	0.257776	0.00112751	615.482
		rs12530071	C	T	-0.014689	0.002241	5.77963e-11	0.224608	7.51555e-05	42.9634
		rs12738019	G	A	-0.013215	0.001881	2.21004e-12	0.556169	8.62162e-05	49.3577
		rs12742428	G	A	-0.016747	0.00203	1.67996e-16	0.650574	0.000127513	68.0582
		rs12747432	T	G	-0.02404	0.003738	1.31e-10	0.066638	7.18904e-05	41.3608
		rs12874404	G	A	-0.064503	0.004124	4.18986e-55	0.055525	0.000436384	244.636
		rs1291414	T	C	0.013016	0.002054	2.39999e-10	0.297653	7.08349e-05	40.1562
		rs12941356	G	A	-0.017387	0.001989	2.45019e-18	0.588457	0.000146423	76.4149
		rs12942576	C	T	0.012325	0.002058	2.18998e-09	0.682951	6.57839e-05	35.8659
		rs12993696	G	A	-0.013558	0.002191	6.32004e-10	0.241702	6.73816e-05	38.2917
		rs13032491	T	C	0.016018	0.002733	4.71998e-09	0.139101	6.1451e-05	34.3507
		rs13073885	C	T	0.012652	0.00201	3.16002e-10	0.315326	6.91181e-05	39.6209
		rs13077681	G	T	0.041426	0.006385	8.99083e-11	0.02315	7.76166e-05	42.0942
		rs13094390	G	A	-0.020844	0.002927	1.10994e-12	0.115983	8.90937e-05	50.7125
		rs13225324	A	G	0.012802	0.002041	3.69003e-10	0.305023	6.94846e-05	39.343
		rs13229868	A	G	0.015633	0.002594	1.73002e-09	0.197255	7.73963e-05	36.3198
		rs13238198	T	C	-0.021599	0.003013	7.87952e-13	0.107602	8.95934e-05	51.3887
		rs13267464	T	C	-0.020483	0.001911	8.9002e-27	0.399388	0.000201283	114.885
		rs13271228	G	T	-0.03058	0.001886	4.35011e-59	0.567054	0.000459159	262.9
		rs1335929	C	T	0.016628	0.001894	1.77011e-18	0.570881	0.000135467	77.0759
		rs13419988	A	G	0.01474	0.001943	3.41979e-14	0.631333	0.000101139	57.5503
		rs139271	C	T	-0.015295	0.001907	1.10994e-15	0.44222	0.000115407	64.3274
		rs140763648	G	A	-0.011679	0.001988	4.34e-09	0.412364	6.61044e-05	34.5125
		rs141936164	G	A	-0.018654	0.001964	2.28981e-21	0.350763	0.000158486	90.211
		rs142676169	T	C	-0.043152	0.00723	2.45997e-09	0.019578	7.14847e-05	35.6224
		rs143273199	C	T	-0.066784	0.002145	1e-200	0.259095	0.00171237	969.368
		rs1437223	C	T	-0.012511	0.002091	2.24999e-09	0.714978	6.37948e-05	35.7993
		rs145447411	C	T	0.045684	0.006336	5.79963e-13	0.023067	9.4062e-05	51.9872
		rs146039611	A	G	0.071441	0.007029	3.06973e-24	0.019361	0.000193804	103.301
		rs146078144	A	G	0.069786	0.009779	9.96093e-13	0.009716	9.3716e-05	50.9268
		rs1472121	T	C	0.01402	0.002235	3.64998e-10	0.775697	6.83995e-05	39.3495
		rs147341073	G	A	-0.074659	0.005841	2.25009e-37	0.027837	0.000301686	163.376
		rs149007767	T	C	-0.072233	0.002651	1.96789e-163	0.16205	0.001417	742.421
		rs149110519	T	C	0.074605	0.005093	1.51008e-48	0.036036	0.00038669	214.579
		rs149287489	G	A	-0.031801	0.003703	9.36052e-18	0.078545	0.000146388	73.7518
		rs150449635	C	T	0.14024	0.006704	4.24033e-97	0.022455	0.000863423	437.597
		rs1535701	G	T	0.020771	0.001925	4.05976e-27	0.621414	0.000202997	116.426
		rs16831132	T	C	-0.013584	0.001931	2.07014e-12	0.39739	8.83769e-05	49.4868
		rs16939607	A	G	-0.025208	0.002656	2.42996e-21	0.146042	0.000158497	90.078
		rs16940328	A	G	0.038726	0.003003	5.14991e-38	0.1123	0.000299007	166.3
		rs16978176	C	T	-0.025359	0.001908	2.89001e-40	0.465252	0.000319987	176.647
		rs17005891	A	G	-0.050963	0.002417	1.15001e-98	0.184381	0.000781166	444.585
		rs17156536	A	C	0.024733	0.002577	8.65964e-22	0.159358	0.000163896	92.1135
		rs17196752	T	C	-0.072454	0.002408	8.09096e-199	0.189945	0.00161546	905.337
		rs1749824	A	C	-0.011909	0.00196	1.26e-09	0.432497	6.96197e-05	36.9179
		rs17575497	T	C	0.366555	0.009065	1e-200	0.013208	0.00350244	1635.09
		rs17656204	T	C	-0.054151	0.002035	6.77642e-156	0.321977	0.0012803	708.08
		rs17700436	T	C	-0.028498	0.004027	1.53003e-12	0.057432	8.79276e-05	50.0799
		rs17758695	T	C	-0.109272	0.005762	3.89045e-80	0.028765	0.00066717	359.641
		rs17860428	A	G	-0.015614	0.002431	1.38998e-10	0.179529	7.18218e-05	41.2531
		rs1800973	A	C	0.113424	0.003883	1.64059e-187	0.061915	0.00149444	853.244
		rs1822534	G	A	-0.030979	0.001911	4.69029e-59	0.394011	0.000458287	262.792
		rs183363123	T	C	0.062591	0.00662	3.44033e-21	0.020836	0.000159854	89.3935
		rs188175496	T	C	-0.092901	0.006733	2.93022e-43	0.024394	0.000410798	190.38
		rs1885525	A	G	0.012936	0.001888	7.62079e-12	0.506048	8.36578e-05	46.9455
		rs1889033	G	A	-0.015731	0.001863	3.1798e-17	0.485351	0.000123626	71.2993
		rs1892548	C	T	-0.062797	0.001987	1e-200	0.654819	0.00178269	998.804
		rs190982	A	G	-0.012414	0.001944	1.76999e-10	0.602656	7.38057e-05	40.7783
		rs192498589	G	A	0.069594	0.00809	8.23948e-18	0.017021	0.00016207	74.0022
		rs1930303	A	G	-0.061771	0.002001	1e-200	0.66324	0.00170447	952.957
		rs1933295	G	A	-0.02438	0.002335	1.7398e-25	0.776592	0.000206248	109.016
		rs1954735	C	T	0.020807	0.002504	1.00995e-16	0.168423	0.00012127	69.0476
		rs1967309	G	A	-0.022132	0.001924	1.42988e-30	0.603077	0.000234504	132.321
		rs1970364	T	C	0.019264	0.002125	1.32008e-19	0.264825	0.000144502	82.1814
		rs1976633	G	A	-0.016163	0.002511	1.25e-10	0.834784	7.2061e-05	41.4332
		rs2018092	C	T	-0.01154	0.001922	1.97002e-09	0.614987	6.30642e-05	36.0498
		rs2019180	A	G	-0.036669	0.003385	2.5698e-27	0.093167	0.000227205	117.349
		rs2038700	C	T	0.039975	0.001919	2.80996e-96	0.394192	0.00076322	433.936
		rs205422	C	T	0.012805	0.002092	9.49008e-10	0.697421	6.92027e-05	37.4657
		rs2074163	A	G	0.018736	0.002478	4.21017e-14	0.177152	0.000102341	57.1675
		rs2084312	T	C	0.037684	0.002351	8.97016e-58	0.800313	0.000453893	256.925
		rs2184697	G	T	-0.014711	0.00207	1.22999e-12	0.292709	8.96084e-05	50.5059
		rs2213290	T	C	0.035585	0.001932	1.10994e-75	0.407826	0.000611629	339.249
		rs2228467	C	T	0.157057	0.003864	1e-200	0.061974	0.00286793	1652.11
		rs2239630	G	A	0.048843	0.001897	4.67735e-146	0.555952	0.00117788	662.931
		rs224111	A	G	-0.020934	0.00192	1.16011e-27	0.390158	0.000208541	118.878
		rs2253843	G	A	-0.013064	0.002133	9.3901e-10	0.278303	6.85575e-05	37.5119
		rs2273215	A	G	-0.01813	0.001963	2.72019e-20	0.458222	0.000163201	85.3008
		rs2274664	T	C	-0.015167	0.001918	2.74979e-15	0.580335	0.00011205	62.5317
		rs2282986	C	T	-0.052342	0.007005	8.2699e-14	0.018393	9.89284e-05	55.8319
		rs2295481	T	C	-0.015251	0.002338	7.1499e-11	0.207397	7.64689e-05	42.5506
		rs2302774	T	G	-0.024203	0.001932	5.67937e-36	0.382509	0.00027672	156.936
		rs231988	C	T	0.025769	0.002888	4.79954e-19	0.868197	0.000151974	79.6157
		rs2327028	T	C	-0.011197	0.001883	2.80001e-09	0.474846	6.25278e-05	35.3591
		rs2338021	C	T	-0.031703	0.002879	3.63999e-28	0.879688	0.000212749	121.259
		rs236513	C	T	-0.020157	0.002934	6.64049e-12	0.117996	8.45706e-05	47.1987
		rs238136	G	A	-0.014997	0.002226	1.67996e-11	0.250043	8.43509e-05	45.3896
		rs2385094	C	T	-0.023922	0.002877	9.72971e-17	0.122214	0.000122782	69.1375
		rs2504209	G	A	0.018355	0.002421	3.58014e-14	0.81111	0.000103235	57.4801
		rs2535393	C	T	-0.015226	0.001929	3.13979e-15	0.598517	0.000111415	62.3025
		rs2548257	A	C	0.012909	0.001966	5.35057e-11	0.653021	7.55171e-05	43.1138
		rs2665405	A	G	0.038394	0.001876	5.37032e-93	0.548346	0.000730159	418.851
		rs2711981	T	C	-0.0216	0.001986	1.59001e-27	0.663087	0.000208461	118.29
		rs2729450	C	T	-0.030635	0.001881	1.35988e-59	0.524171	0.000468155	265.251
		rs2734442	A	G	-0.041999	0.002846	2.99985e-49	0.875502	0.000384528	217.774
		rs2784250	G	T	-0.016907	0.002685	3.11e-10	0.140201	6.89146e-05	39.65
		rs2810883	T	C	-0.012614	0.001878	1.93999e-11	0.544768	7.89187e-05	45.1142
		rs2817441	T	C	-0.02173	0.0021	4.66982e-25	0.279268	0.000190084	107.073
		rs2834670	G	A	0.026935	0.002965	1.10994e-19	0.176408	0.000210812	82.5245
		rs284324	A	G	0.02119	0.00197	5.94019e-27	0.495314	0.000224488	115.698
		rs28505913	T	C	0.018528	0.002693	6.22014e-12	0.140529	8.29248e-05	47.335
		rs290243	A	G	0.014337	0.002274	2.99999e-10	0.214516	6.92697e-05	39.7497
		rs2957873	A	G	-0.021093	0.002384	9.44061e-19	0.808507	0.000137766	78.2821
		rs2978889	A	G	-0.019138	0.001885	3.43005e-24	0.503921	0.00018312	103.079
		rs3012415	T	C	0.020349	0.002546	1.36994e-15	0.822848	0.000120721	63.8804
		rs3027012	T	C	0.028123	0.002424	4.37019e-31	0.182687	0.000236183	134.604
		rs31243	G	A	-0.022555	0.003179	1.3499e-12	0.09625	8.85044e-05	50.3388
		rs3177609	C	T	0.031206	0.003521	8.26038e-19	0.077556	0.000139335	78.5493
		rs3184504	C	T	-0.047075	0.001872	1.58125e-139	0.517396	0.00110669	632.364
		rs329125	A	C	-0.016638	0.002346	1.38007e-12	0.207081	9.09078e-05	50.2973
		rs333947	A	G	0.036848	0.002635	2.21004e-44	0.150214	0.000346639	195.553
		rs34097845	T	C	-0.100554	0.00424	2.99226e-124	0.05601	0.00106921	562.426
		rs34236350	T	C	-0.032235	0.002507	8.43918e-38	0.182541	0.000310107	165.327
		rs34281413	T	C	-0.021083	0.002706	7.00971e-15	0.137178	0.000105221	60.7026
		rs34318943	A	G	0.013658	0.002325	4.38995e-09	0.207354	6.13191e-05	34.5085
		rs34505104	G	A	-0.033131	0.002083	6.3797e-57	0.305345	0.000465649	252.982
		rs34600126	T	G	0.022368	0.002266	6.02976e-23	0.217724	0.000170432	97.439
		rs34743120	A	G	-0.046726	0.00679	6.15035e-12	0.020053	8.58083e-05	47.3561
		rs35068491	C	T	0.014581	0.00235	5.68002e-10	0.20924	7.03548e-05	38.4979
		rs35979828	T	C	-0.046061	0.003696	1.27997e-35	0.070849	0.000279329	155.311
		rs360017	G	A	-0.024481	0.002251	1.61994e-27	0.775236	0.000208857	118.278
		rs36209093	T	C	-0.014405	0.002267	2.15998e-10	0.662691	9.27674e-05	40.3759
		rs3731332	T	C	-0.108009	0.006386	4.00959e-64	0.022895	0.000521953	286.062
		rs3761986	C	T	-0.012146	0.00195	4.88e-10	0.394272	7.04645e-05	38.7968
		rs3789062	T	C	-0.020082	0.002179	3.22033e-20	0.245372	0.000149349	84.9372
		rs3795503	T	C	-0.01889	0.002034	1.67996e-20	0.314513	0.000153862	86.2502
		rs3859570	C	T	-0.027849	0.001998	3.97009e-44	0.424757	0.000379002	194.279
		rs391023	T	C	-0.075903	0.001942	1e-200	0.366325	0.00267474	1527.63
		rs41268099	A	G	0.029048	0.002986	2.47002e-22	0.110855	0.000166338	94.6349
		rs413141	G	A	0.043013	0.002764	1.42004e-54	0.862523	0.000438763	242.171
		rs41409548	A	G	-0.096493	0.005685	1.49005e-64	0.033848	0.000608976	288.091
		rs4142441	G	A	0.031012	0.002648	1.22011e-31	0.151573	0.000247358	137.158
		rs4269828	G	A	0.012209	0.001915	1.88999e-10	0.560056	7.34546e-05	40.6463
		rs4335411	A	G	-0.017413	0.002412	5.51061e-13	0.762473	0.000109828	52.1184
		rs4365101	A	G	-0.026771	0.003761	1.13999e-12	0.068386	9.13193e-05	50.6665
		rs4385425	G	A	-0.060104	0.001999	1.27938e-198	0.323914	0.00158223	904.023
		rs445611	G	A	0.016004	0.002607	8.58005e-10	0.844726	6.71895e-05	37.6854
		rs4470337	G	A	-0.011868	0.0019	4.33002e-10	0.596129	6.78216e-05	39.0163
		rs45577137	G	A	-0.064614	0.004959	9.04899e-39	0.043857	0.000350143	169.771
		rs4566648	G	T	-0.025396	0.001975	8.13954e-38	0.342027	0.000290288	165.346
		rs4577206	T	C	-0.020765	0.003177	6.4998e-11	0.88902	8.50844e-05	42.7196
		rs4626924	T	C	-0.018347	0.00191	8.19974e-22	0.551005	0.000166555	92.2703
		rs4658231	G	A	-0.016005	0.002181	2.22998e-13	0.24867	9.57184e-05	53.8516
		rs4669869	C	T	0.020401	0.001889	3.76011e-27	0.44511	0.000205592	116.637
		rs47341	T	C	0.031081	0.001997	1.46016e-54	0.396	0.000462117	242.232
		rs4737009	A	G	0.015384	0.002209	3.44033e-12	0.235763	8.52849e-05	48.5004
		rs475616	G	A	0.01572	0.00199	2.9703e-15	0.65632	0.000111482	62.4018
		rs4813619	T	G	0.016505	0.001902	4.24033e-18	0.510832	0.000136144	75.3023
		rs4843070	G	A	0.014712	0.002237	5.01996e-11	0.226718	7.58922e-05	43.2524
		rs4871844	C	T	0.015503	0.00201	1.26999e-14	0.343089	0.000108337	59.4891
		rs4905043	A	G	0.018703	0.002008	1.31009e-20	0.399537	0.00016784	86.7548
		rs4907230	A	G	0.015584	0.002002	7.23936e-15	0.323539	0.000106306	60.5938
		rs4970966	T	G	-0.072638	0.002252	1e-200	0.222433	0.00182513	1040.37
		rs4983387	A	G	0.019449	0.003249	2.19999e-09	0.899135	6.86104e-05	35.8338
		rs4987353	A	G	-0.021886	0.002015	1.93019e-27	0.310381	0.000205053	117.973
		rs55684236	A	G	0.01153	0.001956	3.89e-09	0.348464	6.0365e-05	34.7472
		rs55860328	A	G	-0.01367	0.002053	2.88005e-11	0.682365	8.10051e-05	44.3361
		rs56058420	G	A	0.01173	0.001975	2.95999e-09	0.356231	6.31085e-05	35.2744
		rs56344893	A	C	-0.044337	0.00195	2.11836e-114	0.372987	0.00091946	516.966
		rs571497	A	G	-0.028174	0.002628	8.93923e-27	0.154612	0.000207504	114.933
		rs57221391	G	T	-0.022337	0.003693	1.51001e-09	0.07144	6.61959e-05	36.5838
		rs573790	C	T	-0.016093	0.001947	1.48013e-16	0.613652	0.000122802	68.3188
		rs58011825	C	A	0.018373	0.002728	1.69005e-11	0.137161	7.99007e-05	45.3597
		rs58814158	G	T	-0.023512	0.002622	3.23966e-19	0.15736	0.000146604	80.4104
		rs6055955	T	C	-0.028986	0.001876	8.71967e-54	0.508474	0.000419973	238.731
		rs60695341	T	C	-0.018162	0.00235	1.13999e-14	0.197081	0.000104394	59.7296
		rs60699901	C	T	0.021517	0.002926	2.02023e-13	0.118119	9.64547e-05	54.0771
		rs60752752	G	A	0.025004	0.002957	2.94985e-17	0.117985	0.000130122	71.5014
		rs61165644	G	A	-0.026402	0.002716	2.59e-22	0.14078	0.000168635	94.4958
		rs6120950	T	C	-0.019355	0.002341	1.45011e-16	0.202811	0.000121135	68.3568
		rs61736007	A	G	-0.014039	0.002138	5.32967e-11	0.268453	7.74128e-05	43.1177
		rs61753095	T	C	0.015501	0.002326	2.77013e-11	0.209481	7.95804e-05	44.4118
		rs61971980	A	G	-0.018223	0.002477	1.98016e-13	0.172612	9.48528e-05	54.1235
		rs61985545	A	G	-0.01149	0.001887	1.17999e-09	0.495161	6.60039e-05	37.0761
		rs62011334	G	A	0.011932	0.00199	2.1e-09	0.355185	6.52148e-05	35.9516
		rs62018159	A	G	0.015004	0.002338	1.42001e-10	0.209149	7.44723e-05	41.1835
		rs62054807	T	C	0.020073	0.002064	2.45019e-22	0.294764	0.000167519	94.5809
		rs62057793	A	G	-0.019484	0.002995	8.00018e-11	0.111608	7.52811e-05	42.3215
		rs62143205	A	G	-0.057574	0.003245	2.18022e-70	0.104321	0.000619451	314.791
		rs62176784	G	A	0.02263	0.002002	1.35988e-29	0.319489	0.000222685	127.773
		rs62261974	G	A	-0.016569	0.002414	7.00971e-12	0.183464	8.22524e-05	47.1104
		rs62470670	G	A	-0.023333	0.00323	5.30029e-13	0.092471	9.13771e-05	52.1836
		rs62491927	A	C	-0.012993	0.002145	1.42001e-09	0.256754	6.44316e-05	36.6913
		rs62501136	A	G	0.020496	0.002268	1.71989e-19	0.221444	0.000144851	81.6677
		rs62502392	A	G	-0.017907	0.00267	2.08018e-11	0.143097	7.8639e-05	44.9802
		rs628965	G	A	-0.012645	0.001982	1.84001e-10	0.630893	7.4469e-05	40.7032
		rs6429432	C	A	-0.079652	0.002993	6.29506e-156	0.891513	0.00122724	708.236
		rs6429438	G	A	0.02083	0.002957	1.93019e-12	0.886382	8.7393e-05	49.622
		rs644492	G	A	-0.020069	0.002358	1.83992e-17	0.195876	0.000126878	72.4373
		rs6470759	A	G	-0.018194	0.001932	5.03965e-21	0.588502	0.000160325	88.683
		rs647137	A	G	0.020504	0.002031	6.26037e-24	0.697455	0.000177424	101.919
		rs6493575	T	C	-0.01218	0.00191	1.85999e-10	0.395673	7.09468e-05	40.6655
		rs6512627	A	G	-0.047438	0.002378	1.83021e-88	0.19363	0.000702732	397.949
		rs6545873	C	T	-0.015343	0.001915	1.18005e-15	0.610495	0.000111956	64.1921
		rs6579771	T	C	0.033644	0.002115	6.13056e-57	0.268553	0.000444691	253.042
		rs6591578	A	G	0.021869	0.001941	2.03002e-29	0.633592	0.000222056	126.942
		rs662333	A	G	-0.01382	0.002263	1.05e-09	0.779527	6.56497e-05	37.2945
		rs6664626	T	G	0.018875	0.002862	4.38026e-11	0.142992	8.73173e-05	43.4944
		rs6687430	A	G	0.011892	0.001876	2.41002e-10	0.54337	7.01778e-05	40.183
		rs6696074	T	C	0.018322	0.00192	1.49005e-21	0.562926	0.000165189	91.0629
		rs6706095	G	T	0.01931	0.002182	9.20026e-19	0.760044	0.000136008	78.3165
		rs67224956	C	T	0.026909	0.002479	2.01002e-27	0.170315	0.00020464	117.826
		rs6736362	T	C	0.022174	0.001885	6.4506e-32	0.559146	0.000242403	138.377
		rs6740847	G	A	0.127269	0.001885	1e-200	0.562078	0.00797386	4558.49
		rs6745920	C	T	0.012709	0.001997	2.01999e-10	0.619377	7.61558e-05	40.5009
		rs6753534	T	C	0.012908	0.001889	8.58025e-12	0.562248	8.2017e-05	46.6931
		rs676996	G	T	-0.043816	0.002003	5.12861e-106	0.32021	0.000835805	478.522
		rs6796	C	T	0.045504	0.002116	1.65959e-102	0.274261	0.000824278	462.451
		rs6800122	T	C	-0.021775	0.001911	4.75007e-30	0.399684	0.000227532	129.835
		rs6869021	T	C	-0.016905	0.002017	5.47016e-17	0.313259	0.000122958	70.2452
		rs6883116	C	T	-0.017985	0.001921	8.20918e-21	0.417349	0.000157311	87.6525
		rs695113	T	C	0.021098	0.002054	1.03992e-24	0.696592	0.000188156	105.507
		rs7030655	T	G	0.020088	0.002019	2.66011e-23	0.308549	0.000172182	98.9918
		rs706819	C	T	0.018421	0.002154	1.29003e-17	0.738253	0.000131142	73.1364
		rs707793	C	T	-0.030323	0.001881	2.1301e-58	0.531284	0.000457942	259.875
		rs707845	G	A	-0.016649	0.001871	6.08976e-19	0.51052	0.000138533	79.1821
		rs7095778	G	A	-0.020412	0.003252	3.56e-10	0.091164	6.90415e-05	39.3975
		rs7097656	C	T	0.020177	0.002312	2.80027e-18	0.794776	0.000132806	76.1616
		rs7120300	T	C	-0.017176	0.002124	6.41062e-16	0.734901	0.000114951	65.3933
		rs71331613	A	C	-0.049775	0.005022	3.98016e-23	0.036301	0.000173345	98.2353
		rs71368117	C	T	-0.023586	0.003497	1.58016e-11	0.086908	8.82903e-05	45.49
		rs7180079	G	A	0.059435	0.00287	3.41036e-95	0.876937	0.000762448	428.863
		rs7180804	A	G	-0.077442	0.002141	1e-200	0.256783	0.0022891	1308.33
		rs7185007	T	C	-0.016721	0.002191	2.39994e-14	0.240169	0.000102044	58.2422
		rs718515	A	G	-0.019941	0.001891	5.65979e-26	0.552238	0.000196652	111.201
		rs7196129	C	T	0.025016	0.001905	2.45019e-39	0.530279	0.000311753	172.442
		rs723585	G	A	-0.016542	0.00187	9.42975e-19	0.483425	0.000136669	78.2512
		rs7249692	C	T	-0.017222	0.002004	8.8308e-18	0.670676	0.000131019	73.8533
		rs72673751	C	T	-0.016555	0.002389	4.35011e-12	0.189986	8.43534e-05	48.0202
		rs72675573	T	C	0.015967	0.001937	1.75995e-16	0.366495	0.000118384	67.9494
		rs72720206	A	G	-0.016183	0.001998	5.81969e-16	0.326922	0.000115254	65.6033
		rs72790862	C	T	-0.020289	0.002032	1.91999e-23	0.307082	0.000175181	99.6947
		rs72805138	A	G	0.029548	0.003399	3.69999e-18	0.090934	0.000144347	75.5705
		rs72836307	T	C	-0.040906	0.002579	1.36994e-56	0.156407	0.000441564	251.576
		rs72987040	A	C	-0.024778	0.002838	2.71019e-18	0.124193	0.000133557	76.2265
		rs73067080	C	T	-0.015721	0.002549	7.11001e-10	0.160101	6.64678e-05	38.0381
		rs7308348	C	T	0.015377	0.002468	4.78002e-10	0.182113	7.04381e-05	38.8196
		rs73142138	G	A	0.012783	0.001915	2.5698e-11	0.399541	7.84044e-05	44.5581
		rs731707	C	T	0.04713	0.001913	5.30884e-134	0.489214	0.0011101	606.964
		rs73201961	C	A	0.027169	0.003286	1.44012e-16	0.089234	0.000119982	68.3613
		rs73217470	G	A	0.064788	0.004478	2.11009e-47	0.046722	0.000373904	209.324
		rs73467599	C	T	0.018458	0.002363	5.94977e-15	0.199459	0.000108802	61.0155
		rs73784287	G	A	0.015482	0.002645	4.93003e-09	0.14927	6.08763e-05	34.2611
		rs73809166	C	T	0.046464	0.006392	3.78007e-13	0.023149	9.76391e-05	52.8394
		rs739241	A	G	0.018082	0.001948	1.71989e-20	0.606788	0.000156022	86.1615
		rs745570	G	A	0.014068	0.001948	5.38022e-13	0.513574	9.88814e-05	52.1537
		rs745822	G	T	0.016402	0.001942	3.16009e-17	0.375667	0.000126195	71.3335
		rs74735005	C	T	-0.016977	0.002327	3.13979e-13	0.206468	9.44429e-05	53.2264
		rs74765249	T	C	0.012761	0.002093	1.12001e-09	0.281465	6.58676e-05	37.1731
		rs7516138	G	A	-0.022592	0.00193	1.31009e-31	0.391091	0.000243091	137.023
		rs7524046	A	G	0.014654	0.002156	1.10994e-11	0.251336	8.08135e-05	46.1969
		rs7569084	T	C	0.027559	0.001895	7.39946e-48	0.583833	0.000369074	211.498
		rs7574456	T	C	-0.040256	0.002125	5.19996e-80	0.739962	0.000623645	358.874
		rs761841	C	T	0.012242	0.001903	1.31e-10	0.576839	7.31636e-05	41.3833
		rs7633965	C	A	0.025005	0.003657	8.35026e-12	0.929301	8.21587e-05	46.7522
		rs76424165	T	C	-0.024988	0.003376	1.40994e-13	0.084238	9.63349e-05	54.7843
		rs76427287	C	T	0.024864	0.002345	3.04018e-26	0.254121	0.000234359	112.423
		rs76428106	C	T	0.53552	0.00861	1e-200	0.013445	0.00760788	3868.51
		rs7776054	G	A	-0.037905	0.002128	6.08976e-71	0.260831	0.000554021	317.284
		rs7785014	C	T	-0.025276	0.002005	2.03986e-36	0.670805	0.00028216	158.923
		rs7786376	G	A	0.012376	0.002112	4.72999e-09	0.275978	6.12092e-05	34.3377
		rs7787179	G	A	0.020818	0.002322	3.30979e-19	0.206875	0.000142219	80.3807
		rs78218855	T	C	0.021951	0.003688	2.72998e-09	0.068442	6.14428e-05	35.4262
		rs7824937	G	A	0.01766	0.001942	1.02991e-19	0.368567	0.000145163	82.6954
		rs7826487	G	A	-0.040998	0.002967	2.1702e-43	0.115769	0.000344123	190.936
		rs7836456	G	T	-0.015046	0.00195	1.26009e-14	0.514396	0.000113097	59.5348
		rs7861055	G	A	-0.014062	0.00187	5.65979e-14	0.487561	9.88087e-05	56.547
		rs790056	T	C	0.015359	0.002309	2.97989e-11	0.795221	7.68297e-05	44.2462
		rs7918233	A	G	0.011987	0.001871	1.54e-10	0.488786	7.18079e-05	41.0461
		rs7919533	C	T	0.02038	0.00191	1.54989e-26	0.487915	0.000207551	113.852
		rs79407714	A	G	-0.064354	0.005795	1.27997e-28	0.030003	0.000241055	123.323
		rs7971382	A	G	0.011735	0.001983	3.34003e-09	0.373961	6.44798e-05	35.0202
		rs7975680	C	A	0.012577	0.001978	2.12002e-10	0.60413	7.56601e-05	40.4296
		rs798563	C	A	0.017561	0.00208	3.22998e-17	0.297123	0.000128808	71.2804
		rs79894332	A	G	-0.048205	0.003116	6.29941e-54	0.10046	0.000419979	239.325
		rs8016326	A	G	0.061068	0.002145	3.81066e-178	0.733765	0.00145707	810.534
		rs8049116	T	C	0.022989	0.002903	2.52e-15	0.118269	0.000110224	62.7111
		rs809845	T	C	0.015411	0.001889	3.57026e-16	0.443499	0.000117233	66.5574
		rs8207	G	A	0.013527	0.002103	1.29e-10	0.26667	7.1566e-05	41.3735
		rs834601	C	T	-0.011293	0.001872	1.66001e-09	0.492962	6.37533e-05	36.3919
		rs869785	C	T	-0.017204	0.001981	3.97009e-18	0.669622	0.000130957	75.4203
		rs871134	T	C	0.038297	0.001915	7.05992e-89	0.571095	0.000718504	399.936
		rs907612	T	C	-0.033053	0.002022	5.19039e-60	0.380435	0.000515014	267.213
		rs915125	T	C	0.033833	0.002086	4.3401e-59	0.282198	0.000463735	263.058
		rs929446	T	C	-0.018163	0.001913	2.32006e-21	0.405368	0.000159039	90.1454
		rs9316470	A	G	-0.017012	0.002823	1.72001e-09	0.127172	6.42482e-05	36.3151
		rs932641	A	G	-0.01353	0.002174	4.98999e-10	0.251475	6.89171e-05	38.7324
		rs932905	A	G	0.021032	0.002083	6.10942e-24	0.28178	0.000179044	101.949
		rs9375150	G	T	-0.018406	0.001886	1.83992e-22	0.446815	0.000167474	95.2432
		rs9379077	G	A	0.02858	0.00233	1.46016e-34	0.200867	0.00026223	150.456
		rs9390460	C	T	0.011811	0.001874	3.01002e-10	0.53796	6.93478e-05	39.7221
		rs9410425	A	G	-0.030029	0.001994	3.22998e-51	0.324599	0.000395385	226.793
		rs9480737	G	A	-0.021684	0.002003	2.73968e-27	0.321131	0.000205011	117.197
		rs9494573	C	T	-0.015656	0.001905	2.18022e-16	0.588851	0.000118685	67.5414
		rs9532580	C	T	-0.028091	0.002128	9.72076e-40	0.263677	0.000306411	174.257
		rs9555596	C	T	0.022922	0.001929	1.54989e-32	0.383331	0.000248405	141.201
		rs9606614	T	C	0.034124	0.005294	1.19001e-10	0.033429	7.52501e-05	41.548
		rs9637714	C	T	-0.016305	0.002084	5.42001e-15	0.289005	0.000109256	61.2131
		rs9674881	T	C	0.06335	0.002158	2.15774e-189	0.486067	0.00200505	861.764
		rs9783374	C	T	0.020919	0.002683	6.6896e-15	0.849046	0.000112173	60.7909
		rs9787298	C	A	-0.016032	0.00229	2.66011e-12	0.210661	8.54778e-05	49.012
		rs9809116	G	A	0.01741	0.00191	8.20918e-20	0.408841	0.000146516	83.0862
		rs9815073	A	C	-0.021799	0.002061	4.16006e-26	0.345844	0.000215013	111.87
		rs9898876	T	G	0.017631	0.002367	9.89008e-14	0.197491	9.85329e-05	55.4825
		rs9915112	G	A	-0.026556	0.002328	4.21017e-30	0.203142	0.000228316	130.124
		rs9943753	G	A	0.013507	0.001953	4.78961e-12	0.627675	8.52717e-05	47.8312
		rs9963693	C	T	0.013323	0.002145	5.39002e-10	0.260621	6.84086e-05	38.5787
Myeloid DC	P<1e-06, r2<0.01 in 10000 kb	rs112750600	T	C	0.607	0.1176	2.58702e-07	0.0114	0.00830487	26.626
		rs12036432	A	C	0.1352	0.02725	7.34598e-07	0.3102	0.00782255	24.6016
		rs139376787	A	G	-0.2569	0.04871	1.41801e-07	0.0753	0.00919082	27.7994
		rs2820576	T	C	-0.1381	0.02602	1.17501e-07	0.6131	0.00904789	28.1525
		rs33941127	T	C	-0.1844	0.03059	1.81798e-09	0.2309	0.012077	36.3167
		rs34622012	G	A	0.2123	0.03878	4.701e-08	0.1202	0.00953275	29.9521
		rs35161722	T	C	0.4292	0.08648	7.26608e-07	0.0232	0.00834917	24.6168
		rs35211479	G	T	0.1649	0.02937	2.13201e-08	0.7189	0.0109901	31.5048
		rs4656251	G	A	0.1358	0.02624	2.39701e-07	0.5654	0.00906306	26.768
		rs71632979	G	A	0.6546	0.02797	2.29087e-112	0.2449	0.15848	547.407
		rs71639910	A	G	0.2892	0.05077	1.33999e-08	0.0686	0.0106878	32.4284
		rs9651035	T	C	0.256	0.02747	2.04597e-20	0.3249	0.0287493	86.7973
Natural Killer	P<1e-06, r2<0.01 in 10000 kb	rs11652532	A	G	0.2133	0.03297	1.11199e-10	0.1574	0.0120681	41.8317
		rs17824379	G	A	-1.189	0.2213	8.28896e-08	0.0027	0.00761348	28.8511
		rs183053322	T	C	-0.3926	0.06648	3.83001e-09	0.0356	0.0105837	34.8563
		rs9916257	T	G	-0.2005	0.02398	8.82064e-17	0.5686	0.0197218	69.8703
Natural Killer T	P<1e-06, r2<0.01 in 10000 kb	rs10512470	A	G	-0.1912	0.0338	1.649e-08	0.1626	0.00995541	31.9819
		rs12792298	T	C	-0.3521	0.06692	1.51001e-07	0.0345	0.00825911	27.6683
		rs12895031	T	C	-0.207	0.04067	3.79901e-07	0.1044	0.00801282	25.8913
		rs139249541	G	A	0.4624	0.07284	2.44298e-10	0.0316	0.013086	40.2771
		rs35164053	A	G	-0.5201	0.1061	9.84895e-07	0.0151	0.00804587	24.0162
		rs555388	T	C	-0.1841	0.0344	9.14703e-08	0.847	0.00878441	28.6255
		rs73109444	T	C	0.3815	0.0753	4.24405e-07	0.0279	0.00789467	25.6544
		rs75494211	A	G	0.4706	0.07011	2.22382e-11	0.0328	0.0140515	45.0304
		rs78268116	T	C	-0.4086	0.03904	2.79383e-25	0.1096	0.0325854	109.481
		rs9488834	A	G	0.3368	0.05929	1.44401e-08	0.0465	0.0100588	32.251
		rs9916629	C	T	0.1457	0.02472	4.132e-09	0.5123	0.0106078	34.7204
		rs9983338	T	C	-0.4558	0.09222	8.046e-07	0.0188	0.00766468	24.4152
Neutrophil	P<1e-09, r2<0.001 in 10000 kb	rs10049210	C	T	0.015339	0.001971	7.5405e-15	0.403384	0.00011325	60.5646
		rs10181102	C	T	0.015749	0.002154	2.72019e-13	0.272406	9.832e-05	53.458
		rs10252457	G	A	-0.013839	0.001962	1.82012e-12	0.425632	9.36405e-05	49.7519
		rs1042725	T	C	0.012765	0.001924	3.32966e-11	0.494436	8.14625e-05	44.018
		rs10447304	A	G	-0.016591	0.001919	5.57956e-18	0.505743	0.000137612	74.747
		rs1047891	A	C	-0.019307	0.002064	8.79023e-21	0.315122	0.000160898	87.5001
		rs10498635	T	C	-0.030199	0.002491	8.72971e-34	0.183683	0.000273491	146.972
		rs1057258	T	C	0.016508	0.002615	2.83002e-10	0.178065	7.97691e-05	39.8514
		rs10864368	C	T	0.023683	0.001914	4.00959e-35	0.502691	0.000280434	153.104
		rs10945542	T	C	0.011993	0.001925	4.82003e-10	0.521167	7.17871e-05	38.8144
		rs10948036	A	C	0.029687	0.002362	3.4898e-36	0.210175	0.0002926	157.969
		rs10992394	A	G	0.01389	0.002279	1.13999e-09	0.230846	6.85126e-05	37.1462
		rs10995477	C	T	-0.030415	0.001923	2.86022e-56	0.473501	0.000461237	250.159
		rs11039195	A	G	0.018481	0.00207	4.53002e-19	0.317401	0.000147998	79.7092
		rs11064881	A	G	-0.034163	0.003693	2.36974e-20	0.073489	0.000158933	85.5759
		rs11104881	C	T	-0.025942	0.002106	7.83971e-35	0.701718	0.000281726	151.736
		rs114050631	T	C	-0.16255	0.010051	8.73977e-59	0.011126	0.000581412	261.549
		rs114427170	A	G	0.031948	0.005372	2.81002e-09	0.036578	7.19373e-05	35.3683
		rs11580229	A	G	-0.023208	0.002028	2.75994e-30	0.46164	0.000267721	130.96
		rs11625865	A	G	-0.015284	0.002061	1.26009e-13	0.61034	0.000111112	54.9941
		rs116447416	G	A	-0.037054	0.005232	1.46994e-12	0.035073	9.29325e-05	50.1572
		rs11648664	A	G	-0.014176	0.001963	5.43e-13	0.402087	9.66263e-05	52.1513
		rs11651753	T	C	0.012156	0.001937	3.59998e-10	0.429398	7.2411e-05	39.3841
		rs116631966	A	G	0.040344	0.006236	1.02e-10	0.02482	7.87906e-05	41.8547
		rs11664534	T	C	-0.016004	0.00193	1.16011e-16	0.524958	0.000127745	68.7608
		rs11673093	A	G	-0.048844	0.002196	1.44877e-109	0.259947	0.00091791	494.716
		rs11683933	A	C	0.030649	0.004249	5.72005e-13	0.055134	9.78706e-05	52.0304
		rs1168669	C	T	-0.014725	0.002498	3.86999e-09	0.813559	6.57765e-05	34.7475
		rs11689257	A	G	-0.024562	0.00388	2.50998e-10	0.069886	7.84303e-05	40.074
		rs11690365	G	T	0.011899	0.002008	3.21004e-09	0.63957	6.5277e-05	35.1149
		rs11712552	G	A	0.030473	0.002893	6.4506e-26	0.126219	0.000204827	110.951
		rs11716015	T	C	-0.012851	0.001992	1.16001e-10	0.635724	7.64897e-05	41.6192
		rs11721064	T	G	0.01439	0.001974	3.22033e-13	0.609084	9.8608e-05	53.1405
		rs11723621	G	A	-0.026932	0.002109	2.66993e-37	0.290775	0.000299163	163.073
		rs11735662	T	C	0.047562	0.00534	5.58985e-19	0.033581	0.000146828	79.3297
		rs11993347	C	T	-0.021579	0.002282	3.3597e-21	0.230055	0.000164962	89.419
		rs12118277	T	C	0.014887	0.002004	1.15001e-13	0.351878	0.000101087	55.1845
		rs12189880	T	C	-0.016057	0.002269	1.53993e-12	0.240741	9.42538e-05	50.0793
		rs12214269	A	G	0.019394	0.001922	6.59933e-24	0.545471	0.000186508	101.818
		rs12328347	G	T	-0.016095	0.001997	7.97076e-16	0.372663	0.000121124	64.9567
		rs12378064	T	C	-0.013698	0.002041	1.99022e-11	0.649709	8.54067e-05	45.0429
		rs1245035	A	C	0.01631	0.001998	3.39e-16	0.628096	0.000124278	66.637
		rs12481262	C	T	-0.014609	0.002019	4.78961e-13	0.460009	0.000106029	52.356
		rs12487658	T	C	0.017015	0.002418	2.06016e-12	0.801636	9.20734e-05	49.5165
		rs1250568	C	T	-0.01382	0.002024	8.88996e-12	0.435133	9.38889e-05	46.6223
		rs12530608	G	A	-0.016172	0.002739	3.63003e-09	0.146298	6.53284e-05	34.8612
		rs12541521	G	A	0.012739	0.001935	4.7698e-11	0.450195	8.0336e-05	43.3418
		rs12550612	A	G	-0.030838	0.002548	1.08993e-33	0.821991	0.000278299	146.478
		rs1260326	C	T	-0.032512	0.001958	6.91035e-62	0.602032	0.000506507	275.715
		rs12658947	G	A	0.01303	0.002195	3.01002e-09	0.256773	6.48022e-05	35.2386
		rs12927351	A	C	0.021608	0.002406	2.83009e-19	0.198578	0.000148611	80.6559
		rs12930850	G	A	0.018982	0.001938	1.29003e-22	0.537098	0.000179166	95.9345
		rs13190036	G	A	-0.021805	0.003135	3.62994e-12	0.891442	9.20232e-05	48.3766
		rs13392977	A	G	0.028237	0.004266	3.72992e-11	0.053967	8.14145e-05	43.8121
		rs1362623	T	C	0.018278	0.002376	1.49005e-14	0.207792	0.000109991	59.1783
		rs1366045	C	T	-0.021881	0.001969	1.20005e-28	0.38497	0.000226719	123.493
		rs1371794	C	A	-0.07253	0.00198	1e-200	0.622286	0.00247297	1341.85
		rs1411424	A	G	-0.011488	0.001926	2.50998e-09	0.523053	6.58468e-05	35.5774
		rs1412445	T	C	0.021069	0.002026	2.63998e-25	0.338068	0.000198671	108.145
		rs1445171	C	T	0.014312	0.001927	1.15001e-13	0.516908	0.0001023	55.1614
		rs1474419	C	T	0.017679	0.001966	2.54976e-19	0.578829	0.000152389	80.8624
		rs148713124	T	G	0.088156	0.010527	5.85059e-17	0.008947	0.000137819	70.1282
		rs1490384	T	C	-0.014654	0.001917	2.18978e-14	0.501387	0.000107369	58.4341
		rs149157044	T	C	-0.031196	0.005067	7.67008e-10	0.039439	7.37358e-05	37.9048
		rs150861794	T	C	-0.052592	0.007502	2.47002e-12	0.019777	0.000107239	49.1455
		rs152232	C	T	0.013712	0.001979	4.45041e-12	0.38408	8.89565e-05	48.0074
		rs1555275	G	A	-0.01369	0.002046	2.29985e-11	0.649639	8.53149e-05	44.7707
		rs1571956	A	G	0.013715	0.002029	1.42988e-11	0.646094	8.60212e-05	45.6905
		rs16850073	T	C	0.052054	0.001999	2.11836e-149	0.374485	0.00126943	678.08
		rs16939607	A	G	-0.028446	0.002728	1.99022e-25	0.146029	0.000201816	108.731
		rs16958642	A	G	0.022296	0.00353	2.77e-10	0.082607	7.53453e-05	39.8936
		rs16961474	A	G	-0.017035	0.002794	1.10999e-09	0.136787	6.85294e-05	37.1732
		rs17026212	G	T	-0.016843	0.001917	1.61994e-18	0.512906	0.000141749	77.1957
		rs17139597	G	T	-0.034067	0.004886	3.22998e-12	0.039897	8.89111e-05	48.6138
		rs172240	A	G	-0.02044	0.002698	3.71022e-14	0.850405	0.0001063	57.3953
		rs17728	C	T	0.023764	0.003344	1.22999e-12	0.909008	9.342e-05	50.5016
		rs17742008	A	C	-0.017804	0.002354	4.10015e-14	0.212295	0.000106015	57.2032
		rs17758695	T	C	-0.036835	0.005902	4.48002e-10	0.028781	7.58533e-05	38.9512
		rs17831500	C	A	-0.019905	0.002302	5.64027e-18	0.223581	0.000137558	74.7674
		rs1788493	T	C	0.013157	0.001958	1.88018e-11	0.499803	8.65533e-05	45.153
		rs1800961	T	C	-0.051942	0.005553	8.99083e-21	0.031018	0.00016218	87.4944
		rs180941	A	G	-0.013018	0.002003	8.32914e-11	0.625196	7.94217e-05	42.2401
		rs1885474	G	T	-0.023515	0.003162	1.07994e-13	0.103145	0.000102303	55.305
		rs1886654	C	T	-0.058459	0.003081	3.07964e-80	0.892013	0.000658378	360.013
		rs1966479	G	A	0.014401	0.002026	1.21004e-12	0.660217	9.30473e-05	50.5248
		rs1977289	C	T	-0.018227	0.001918	2.13993e-21	0.478516	0.000165805	90.3091
		rs1985157	C	T	0.026496	0.002038	1.29003e-38	0.410403	0.000339748	169.025
		rs2001613	T	C	0.012012	0.002004	2.12002e-09	0.472052	7.19187e-05	35.928
		rs2038700	C	T	0.033462	0.00197	1.24997e-64	0.394281	0.000534824	288.516
		rs2046934	A	G	0.015004	0.002487	1.66001e-09	0.82324	6.55171e-05	36.3966
		rs2062250	A	G	0.047004	0.004075	9.62055e-31	0.938519	0.000254967	133.049
		rs2082382	A	G	-0.029475	0.001942	5.39014e-52	0.552392	0.000429618	230.36
		rs212409	A	G	-0.021224	0.001932	4.70977e-28	0.554194	0.000222583	120.681
		rs2157770	G	A	0.02099	0.002214	2.66993e-21	0.287199	0.000180387	89.881
		rs2239626	C	T	0.012497	0.002093	2.43002e-09	0.305475	6.62682e-05	35.651
		rs2241621	C	A	-0.014948	0.001958	2.36974e-14	0.588178	0.000108247	58.2826
		rs2254458	T	C	-0.013414	0.0021	1.75999e-10	0.644615	8.24415e-05	40.8015
		rs2260766	G	A	0.022964	0.002133	5.22035e-27	0.281952	0.000213527	115.908
		rs2282611	G	T	-0.012603	0.002063	1.03001e-09	0.319925	6.91167e-05	37.3205
		rs2290846	A	G	0.018804	0.002127	9.91973e-19	0.284312	0.000143896	78.1563
		rs2312675	C	T	-0.019845	0.002343	2.60976e-17	0.211949	0.000131558	71.7391
		rs2314339	T	C	0.033036	0.002965	8.31955e-29	0.124538	0.000237982	124.143
		rs2315008	G	T	0.016403	0.002058	1.63983e-15	0.666951	0.00011953	63.5264
		rs2421200	T	G	-0.020525	0.001917	1.02991e-26	0.486641	0.000210487	114.636
		rs2432142	A	G	0.01491	0.001945	1.89017e-14	0.435047	0.000109278	58.7644
		rs2468832	A	C	0.015199	0.002272	2.33024e-11	0.238866	8.39993e-05	44.7519
		rs2476601	G	A	0.038024	0.003178	5.81969e-33	0.899665	0.000261023	143.155
		rs249677	A	C	0.02335	0.001997	1.46994e-31	0.634081	0.000253008	136.715
		rs2519093	T	C	-0.040099	0.00248	9.83105e-59	0.184749	0.000484363	261.434
		rs2522051	C	T	0.024	0.00193	1.88018e-35	0.454362	0.000285601	154.634
		rs2561758	G	A	-0.034011	0.002173	3.4898e-55	0.72298	0.000463347	244.973
		rs257063	T	C	-0.014793	0.002192	1.53993e-11	0.741226	8.39487e-05	45.5439
		rs2632372	C	T	-0.020982	0.001915	6.68036e-28	0.503861	0.000220109	120.048
		rs2665405	A	G	0.02951	0.001927	6.74062e-53	0.54844	0.000431333	234.516
		rs2710804	C	T	0.019677	0.001984	3.76011e-23	0.376402	0.000181763	98.3632
		rs2729707	G	A	-0.035655	0.002553	2.67979e-44	0.830755	0.000357487	195.046
		rs2734031	C	T	-0.067521	0.003335	4.20049e-91	0.907968	0.000761934	409.906
		rs2807742	A	G	0.032553	0.002294	1.16011e-45	0.771408	0.000373729	201.369
		rs2808519	T	G	0.016109	0.002179	1.50003e-13	0.737582	0.000100455	54.6539
		rs2839183	A	G	-0.013129	0.001958	2.09991e-11	0.404817	8.3062e-05	44.961
		rs284317	G	A	0.01361	0.002018	1.59993e-11	0.495955	9.261e-05	45.4854
		rs28530750	A	G	0.05608	0.004812	2.35993e-31	0.043105	0.000259441	135.82
		rs28540102	C	T	0.01708	0.00205	8.50942e-17	0.658597	0.000131188	69.4171
		rs28571765	C	T	-0.022365	0.002368	3.80014e-21	0.206001	0.000163628	89.2016
		rs28588142	T	C	0.015218	0.002462	6.59994e-10	0.188391	7.08194e-05	38.2065
		rs301819	G	A	-0.014039	0.001954	6.95985e-13	0.583755	9.57816e-05	51.6204
		rs303753	A	G	-0.022761	0.002045	9.56974e-29	0.345097	0.00023417	123.878
		rs305082	C	T	0.036633	0.002594	3.04018e-45	0.172255	0.000382687	199.436
		rs3184504	C	T	-0.029388	0.001927	1.9002e-52	0.517462	0.000431301	232.581
		rs33951980	T	C	-0.027627	0.00287	6.62979e-22	0.12936	0.000171924	92.6621
		rs342242	C	T	-0.015768	0.001933	3.61993e-16	0.453135	0.000123223	66.5408
		rs34599082	T	C	-0.173021	0.008416	7.26942e-94	0.013435	0.000793581	422.654
		rs34765661	C	T	0.041722	0.003891	8.58025e-27	0.065332	0.00021259	114.976
		rs35020138	C	T	-0.017619	0.002063	1.42004e-17	0.675273	0.000136141	72.9394
		rs35284073	A	G	0.014664	0.002358	5.15003e-10	0.216975	7.30668e-05	38.6737
		rs354703	C	T	0.01478	0.001954	4.08037e-14	0.593464	0.000105408	57.2134
		rs35734242	C	T	0.023416	0.002022	5.42001e-31	0.427831	0.000268443	134.11
		rs35759345	T	C	0.012607	0.001926	6.19013e-11	0.449913	7.86708e-05	42.8459
		rs35789178	G	T	0.017959	0.002466	3.41036e-13	0.186171	9.77326e-05	53.0367
		rs35915186	C	T	0.024312	0.002345	3.67029e-25	0.215051	0.000199551	107.487
		rs35929659	C	T	-0.019551	0.002634	1.21004e-13	0.179844	0.000112761	55.094
		rs3731332	T	C	-0.119602	0.006536	9.68947e-75	0.022894	0.000639986	334.851
		rs3735311	C	T	-0.019532	0.002011	2.81968e-22	0.648694	0.00017388	94.3339
		rs3735485	G	A	0.029483	0.002681	4.19952e-28	0.844938	0.000227774	120.934
		rs3739873	A	G	-0.013878	0.002347	3.45001e-09	0.22025	6.61538e-05	34.9644
		rs3747869	C	A	0.032659	0.003343	1.61994e-22	0.900896	0.000190459	95.4402
		rs3749440	G	A	0.017362	0.001984	2.19989e-18	0.372369	0.000140899	76.5798
		rs3754224	C	T	-0.016714	0.002194	2.70023e-14	0.270043	0.000110134	58.0345
		rs3762297	T	C	0.023896	0.002522	2.83009e-21	0.183345	0.000170997	89.7757
		rs3777755	T	C	0.0137	0.002081	4.77969e-11	0.311419	8.04954e-05	43.3406
		rs3781454	A	G	0.024234	0.002094	6.26037e-31	0.677892	0.000256473	133.935
		rs3843301	G	T	-0.018912	0.002076	8.69961e-20	0.364763	0.000165749	82.9886
		rs3861100	G	A	0.018074	0.002017	3.43005e-19	0.347896	0.000148219	80.2962
		rs386243	T	C	-0.026404	0.00229	1.02991e-30	0.250107	0.000261514	132.943
		rs4074882	C	T	0.02794	0.002198	5.61048e-37	0.741751	0.000299075	161.583
		rs409801	C	T	0.021089	0.001929	8.59014e-28	0.502787	0.000222366	119.521
		rs41272536	G	A	-0.03588	0.004892	2.33024e-13	0.046043	0.000113091	53.7935
		rs4145952	A	C	-0.013326	0.001959	1.05999e-11	0.399341	8.51925e-05	46.2732
		rs4276676	C	T	-0.018005	0.00193	1.16011e-20	0.470378	0.000161521	87.0302
		rs4468717	T	C	-0.024976	0.003608	4.58987e-12	0.077663	8.93675e-05	47.9194
		rs4535497	A	C	-0.014386	0.002038	1.74985e-12	0.569887	0.000101457	49.8276
		rs45577137	G	A	0.036447	0.005206	2.63027e-12	0.04513	0.000114489	49.0132
		rs4626924	T	C	0.019408	0.001963	4.98999e-23	0.551299	0.000186353	97.7506
		rs4632345	A	G	-0.012199	0.00206	3.23996e-09	0.677982	6.49796e-05	35.0681
		rs4712614	G	T	-0.01986	0.001977	1.03992e-23	0.620331	0.000185788	100.912
		rs4727392	G	A	-0.017628	0.002176	5.64937e-16	0.736446	0.000120628	65.6276
		rs4729046	C	T	-0.042772	0.003637	6.84069e-32	0.92416	0.000256445	138.303
		rs47341	T	C	0.013023	0.002052	2.26001e-10	0.395885	8.11224e-05	40.2778
		rs4734879	G	A	-0.02134	0.002144	2.63027e-23	0.276452	0.000182182	99.069
		rs4760	G	A	-0.075213	0.002693	1.41906e-171	0.153372	0.00146911	780.03
		rs4761234	C	T	0.021599	0.001928	4.25011e-29	0.483663	0.000233009	125.502
		rs4794820	G	A	0.076088	0.001942	1e-200	0.551375	0.00286413	1535.08
		rs4805881	C	A	-0.014435	0.002068	3.05e-12	0.665289	9.27991e-05	48.7226
		rs4812447	G	A	0.017142	0.001949	1.49005e-18	0.440364	0.000144834	77.3566
		rs4843073	T	C	0.013665	0.002007	1.00995e-11	0.644889	8.5526e-05	46.3578
		rs4844622	T	C	-0.023379	0.002236	1.44012e-25	0.240327	0.000199577	109.322
		rs4903580	T	C	0.016519	0.001929	1.16011e-17	0.456084	0.000135386	73.3333
		rs4924450	A	G	0.013811	0.002198	3.40001e-10	0.70545	7.92694e-05	39.4814
		rs4925756	T	C	-0.013002	0.002091	5.13996e-10	0.691891	7.20763e-05	38.6643
		rs4984803	A	G	-0.017523	0.00205	1.33999e-17	0.595619	0.000147913	73.0647
		rs533483	A	G	-0.017075	0.002273	6.13056e-14	0.244035	0.000107573	56.4314
		rs55729107	G	A	-0.017505	0.002341	7.87046e-14	0.225567	0.000107057	55.9139
		rs55873273	C	T	0.058951	0.006827	6.24022e-18	0.020243	0.00013785	74.5626
		rs55964818	C	T	-0.036463	0.001948	3.94003e-78	0.567723	0.000652579	350.369
		rs56174170	C	T	0.016826	0.002805	2.04e-09	0.139347	6.79075e-05	35.9828
		rs56188865	C	T	-0.027427	0.001984	1.93019e-43	0.373715	0.000352127	191.105
		rs56217149	A	G	0.017409	0.002789	4.45e-10	0.150714	7.75863e-05	38.9627
		rs56378716	G	A	0.129237	0.008674	3.71963e-50	0.012681	0.00041823	221.99
		rs56388170	T	G	0.070039	0.002132	1e-200	0.293956	0.00203622	1079.2
		rs56408111	C	T	0.031091	0.003521	1.10994e-18	0.083714	0.000148296	77.9715
		rs571497	A	G	-0.037928	0.002701	9.75888e-45	0.154629	0.000376087	197.183
		rs5747308	C	A	0.022058	0.001925	2.29985e-30	0.504471	0.000243258	131.301
		rs5753576	T	C	-0.017848	0.00193	2.42996e-20	0.480292	0.000159028	85.519
		rs60124939	T	C	-0.017814	0.002517	1.51985e-12	0.176181	9.21178e-05	50.0904
		rs609264	G	T	0.012618	0.001939	7.93049e-11	0.528467	7.93489e-05	42.3471
		rs610578	G	A	-0.014625	0.002031	6.27047e-13	0.662713	9.56196e-05	51.8526
		rs619450	C	T	0.014214	0.002002	1.29003e-12	0.503233	0.000101015	50.4084
		rs61955089	C	T	0.043703	0.005979	2.78997e-13	0.026928	0.000100093	53.4274
		rs62189859	C	T	0.014074	0.002232	2.95999e-10	0.244372	7.31517e-05	39.7599
		rs62360185	G	A	-0.015947	0.002452	8.05008e-11	0.190708	7.84986e-05	42.2976
		rs62429983	A	G	0.016402	0.002723	1.76999e-09	0.144922	6.66751e-05	36.2825
		rs632887	G	A	0.014283	0.002004	1.05999e-12	0.410714	9.87494e-05	50.7974
		rs634534	G	A	0.012873	0.001934	2.93968e-11	0.54232	8.22635e-05	44.3042
		rs6414435	G	A	0.01709	0.002039	5.57057e-17	0.591762	0.000141115	70.2503
		rs6432335	G	T	0.012236	0.001931	2.42003e-10	0.451562	7.41573e-05	40.1525
		rs6468341	C	T	0.018973	0.002201	7.10068e-18	0.742846	0.000137529	74.3071
		rs6476883	A	G	-0.014009	0.001937	4.96021e-13	0.438614	9.6647e-05	52.3062
		rs6500550	T	C	-0.022363	0.00212	5.52968e-26	0.304296	0.000211744	111.272
		rs6503727	C	T	0.018796	0.002032	2.39001e-20	0.660546	0.000158433	85.5622
		rs6511703	C	T	-0.023286	0.002278	1.65997e-24	0.243985	0.000200038	104.491
		rs655231	A	G	0.014318	0.00195	2.21004e-13	0.591365	9.908e-05	53.913
		rs6672898	A	G	-0.019192	0.00193	2.92012e-23	0.435247	0.000181078	98.8836
		rs6678033	A	G	-0.042708	0.001986	1.45881e-102	0.367919	0.000848347	462.443
		rs67175901	T	C	0.043563	0.003151	1.99022e-43	0.107472	0.000364068	191.134
		rs6734238	G	A	0.03936	0.00195	1.58016e-90	0.40298	0.00074544	407.417
		rs6740847	G	A	0.021748	0.00194	3.95003e-29	0.562056	0.000232845	125.671
		rs6764912	A	G	-0.037245	0.004039	3.13979e-20	0.065313	0.000169368	85.0328
		rs676800	A	C	0.014136	0.002013	2.26986e-12	0.351744	9.11289e-05	49.3133
		rs68016381	T	C	-0.033783	0.00442	2.22998e-14	0.051299	0.000111087	58.4185
		rs68137036	G	A	-0.013048	0.002135	1.02e-09	0.285148	6.94072e-05	37.35
		rs6817881	T	C	0.014302	0.001931	1.3499e-13	0.499266	0.000102273	54.8564
		rs6831590	T	G	-0.020382	0.001987	1.15001e-24	0.367295	0.000193081	105.219
		rs6855981	A	G	-0.016368	0.001987	1.85012e-16	0.372933	0.000125304	67.8569
		rs6859727	C	T	-0.04036	0.002931	4.29042e-43	0.878025	0.000348907	189.613
		rs6877725	C	T	-0.025077	0.001941	3.97009e-38	0.444789	0.000310594	166.916
		rs6878780	C	T	0.013346	0.001938	6.01035e-12	0.426457	8.71312e-05	47.4234
		rs6915310	T	C	-0.032312	0.00256	1.71002e-36	0.173979	0.000300086	159.311
		rs6924387	G	A	0.017269	0.001967	1.72982e-18	0.412169	0.000144508	77.0769
		rs6927569	C	T	0.025882	0.001921	2.39994e-41	0.523171	0.00033422	181.526
		rs6936191	C	T	0.018088	0.001988	9.86961e-20	0.608046	0.000155949	82.784
		rs694180	G	A	0.018797	0.002017	1.23994e-20	0.656276	0.000159406	86.8488
		rs6985508	A	G	-0.027376	0.002089	3.3597e-39	0.357978	0.00034449	171.736
		rs6998846	A	G	0.01538	0.002334	4.54046e-11	0.782787	8.044e-05	43.4219
		rs7005996	T	C	0.022897	0.00345	3.32966e-11	0.905961	8.93315e-05	44.0471
		rs706809	C	T	0.02055	0.002355	2.77971e-18	0.777232	0.000146237	76.1448
		rs7111987	A	G	-0.012963	0.002024	1.55998e-10	0.353349	7.67918e-05	41.0193
		rs7120300	T	C	-0.016662	0.002178	2.08978e-14	0.734907	0.000108172	58.5244
		rs7183988	G	T	-0.017034	0.001973	6.26037e-18	0.526501	0.000144671	74.5379
		rs7214290	A	G	0.018062	0.00254	1.20005e-12	0.172996	9.33481e-05	50.5665
		rs7225843	C	T	-0.022083	0.002391	2.6903e-20	0.203156	0.000157888	85.3012
		rs723585	G	A	-0.022283	0.001915	2.9703e-31	0.483522	0.000247996	135.397
		rs7235882	T	C	0.02332	0.003325	2.39994e-12	0.093478	9.21669e-05	49.1895
		rs72664840	T	C	0.020857	0.002507	9.21086e-17	0.178952	0.000127832	69.2139
		rs72726027	C	T	-0.043218	0.003051	1.71002e-45	0.11173	0.000370744	200.652
		rs72731564	T	C	0.020208	0.00247	2.94985e-16	0.187005	0.00012417	66.9347
		rs72789923	C	A	0.020456	0.002076	6.95024e-23	0.307359	0.000178166	97.0924
		rs72790862	C	T	-0.021031	0.002085	6.70965e-24	0.307083	0.000188229	101.743
		rs72803323	T	C	0.034499	0.004957	3.55959e-12	0.039743	9.08429e-05	48.4366
		rs72825306	G	A	0.015083	0.002571	4.56005e-09	0.167458	6.34333e-05	34.4167
		rs72832055	A	G	-0.012349	0.002082	3.09001e-09	0.313384	6.56273e-05	35.1804
		rs72836628	T	C	-0.015453	0.002227	4.07005e-12	0.248064	8.90841e-05	48.1486
		rs72978754	C	T	-0.025601	0.003899	5.38022e-11	0.065785	8.05596e-05	43.1127
		rs73049276	A	G	-0.03953	0.004095	5.12979e-22	0.058516	0.000172175	93.1846
		rs7322886	C	T	0.013244	0.001987	2.71019e-11	0.623891	8.23172e-05	44.4264
		rs7341532	T	G	0.011411	0.00193	3.46003e-09	0.521678	6.49831e-05	34.9568
		rs738408	T	C	-0.01613	0.002355	7.73927e-12	0.216873	8.83764e-05	46.9121
		rs74076327	C	T	-0.038703	0.004641	7.85055e-17	0.044994	0.00012873	69.5448
		rs7409459	T	C	0.013123	0.002231	4.15002e-09	0.29703	7.19173e-05	34.5992
		rs749780	A	C	0.018874	0.002179	4.93969e-18	0.731874	0.000139808	75.026
		rs7502100	C	T	0.018716	0.002036	4.07005e-20	0.365944	0.000162554	84.5024
		rs7575465	A	G	-0.012733	0.001942	5.70953e-11	0.553396	8.01401e-05	42.9894
		rs75974417	T	C	-0.016574	0.002361	2.32006e-12	0.211414	9.15941e-05	49.2789
		rs763362	G	A	0.015565	0.001962	2.22998e-15	0.398747	0.000116167	62.9359
		rs7639292	T	C	-0.022268	0.00257	4.82948e-18	0.169103	0.000139345	75.0749
		rs76428106	C	T	0.104475	0.008878	6.25029e-32	0.013438	0.00028941	138.482
		rs76603681	A	G	0.040772	0.005573	2.64972e-13	0.03196	0.000102862	53.5235
		rs7679673	A	C	-0.023824	0.001977	2.14981e-33	0.379766	0.000267381	145.216
		rs7684253	T	C	0.014152	0.001942	3.29003e-13	0.550374	9.91231e-05	53.105
		rs7705526	A	C	0.033578	0.002174	9.18967e-54	0.327035	0.00049628	238.555
		rs7753008	C	T	-0.01284	0.001988	1.07999e-10	0.386894	7.82146e-05	41.7153
		rs77552263	A	G	0.048554	0.00358	7.18952e-42	0.077954	0.0003389	183.943
		rs7776857	T	G	-0.014833	0.002034	3.16009e-13	0.657131	9.91444e-05	53.1807
		rs7777484	G	A	0.011681	0.001945	1.96002e-09	0.420278	6.64885e-05	36.0678
		rs778732	T	C	0.026848	0.003111	6.5298e-18	0.107318	0.000138109	74.477
		rs780142	G	T	0.012729	0.002159	3.83999e-09	0.274175	6.44879e-05	34.7601
		rs7815046	C	A	-0.013143	0.002108	4.64997e-10	0.303314	7.30043e-05	38.8728
		rs7816785	T	C	-0.021221	0.001967	4.31023e-27	0.605849	0.000215074	116.392
		rs7866863	A	G	0.013079	0.002021	1e-10	0.341388	7.69231e-05	41.8808
		rs78738581	A	G	0.021293	0.002282	1.13006e-20	0.231943	0.000161539	87.0644
		rs78813154	T	G	0.01872	0.002729	7.13017e-12	0.144465	8.66248e-05	47.0547
		rs789858	T	C	0.013974	0.001961	1.07004e-12	0.403723	9.40163e-05	50.7791
		rs79047930	T	C	0.053423	0.008352	1.63999e-10	0.014695	8.26469e-05	40.9142
		rs7917772	A	G	0.016148	0.001992	5.41003e-16	0.631343	0.000121382	65.7139
		rs7934719	T	C	0.018084	0.001959	2.81968e-20	0.413488	0.00015862	85.2155
		rs796007	A	G	-0.02067	0.002211	9.41022e-21	0.252821	0.000161417	87.3981
		rs796056	C	A	0.022344	0.001977	1.42988e-29	0.62431	0.000234197	127.734
		rs80296299	T	C	0.026058	0.003037	1e-17	0.116261	0.000139531	73.6192
		rs8030089	T	C	-0.01887	0.002426	7.78933e-15	0.195361	0.000111947	60.5007
		rs8705	A	G	-0.018333	0.002092	1.97015e-18	0.31676	0.000145479	76.7966
		rs876036	C	T	0.021181	0.002055	6.88018e-25	0.321343	0.000195678	106.235
		rs915125	T	C	-0.017639	0.002142	1.91999e-16	0.281985	0.00012599	67.8121
		rs930232	A	G	0.021247	0.002045	2.91005e-25	0.460333	0.000224297	107.946
		rs9390461	G	A	0.017735	0.001926	3.4898e-20	0.538879	0.000156314	84.7907
		rs9402685	C	T	-0.033846	0.002214	1.05003e-52	0.256024	0.0004364	233.7
		rs9419387	A	G	-0.012402	0.001962	2.65999e-10	0.405212	7.41409e-05	39.9562
		rs9543219	T	C	0.012822	0.00195	5.06058e-11	0.574059	8.03984e-05	43.2355
		rs9656395	G	A	-0.022836	0.003291	4.08037e-12	0.095253	8.98827e-05	48.1485
		rs9804265	C	A	-0.04002	0.001997	2.78997e-89	0.366957	0.000744102	401.602
		rs9819371	T	C	-0.043123	0.003916	3.63999e-28	0.064869	0.00022561	121.264
		rs9842724	C	T	-0.014286	0.00242	3.67003e-09	0.800478	6.51916e-05	34.8489
		rs9905106	C	T	0.022774	0.002227	1.61994e-24	0.733598	0.000202724	104.577
		rs9965539	A	G	0.031107	0.002856	1.3499e-27	0.133702	0.000224157	118.631
		rs9977672	A	G	-0.022323	0.002215	7.34007e-24	0.2588	0.000191177	101.568
Periodontitis	P<5e-06, r2<0.01 in 10000 kb	rs13005050	T	C	-0.1432	0.031	3.84935e-06	0.8877	0.00408848	21.3372
		rs138868497	T	C	1.6387	0.3324	8.22701e-07	0.9861	0.0736147	24.3026
		rs151226594	T	G	-0.3671	0.0768	1.75341e-06	0.9841	0.00421731	22.8466
		rs2976950	G	A	-0.0963	0.0195	7.87413e-07	0.4036	0.00446448	24.387
		rs6816769	C	T	0.1348	0.0294	4.53913e-06	0.9175	0.00275087	21.0213
		rs73155039	A	G	0.8316	0.1757	2.21152e-06	0.9841	0.0216419	22.4007
		rs78422482	G	A	-0.2425	0.051	1.98543e-06	0.9791	0.00240673	22.6078
Plasmacytoid DC	P<1e-06, r2<0.01 in 10000 kb	rs12616455	A	G	0.1321	5.57301e-07	5.57301e-07	0.7121	0.00715514	25.1563
		rs1519526	C	T	0.1655	5.89006e-08	5.89006e-08	0.1986	0.00871876	29.5038
		rs16944211	T	C	-1.205	2.80899e-07	2.80899e-07	0.0027	0.00781976	26.4571
		rs2164210	C	T	0.1937	2.11787e-13	2.11787e-13	0.3244	0.016446	54.2939
T cell	P<5e-06, r2<0.01 in 10000 kb	rs11850806	G	T	-0.6286	0.1291	1.16799e-06	0.0083	0.00650485	23.6951
		rs139994967	G	A	0.1828	0.03991	4.79601e-06	0.1024	0.00614278	20.9677
		rs17339549	A	G	0.1161	0.02516	4.12401e-06	0.3597	0.00620895	21.2817
		rs3184504	C	T	-0.1468	0.02633	2.64698e-08	0.5304	0.0107353	31.0679
		rs72960548	C	T	0.2563	0.04796	9.61701e-08	0.073	0.00889057	28.5431
		rs75308045	G	A	-0.1332	0.02697	8.24992e-07	0.3063	0.00753975	24.3786
		rs75424572	G	T	0.3007	0.06324	2.069e-06	0.0402	0.00697756	22.5967
		rs75995320	A	G	-0.4299	0.08871	1.31099e-06	0.0171	0.00621256	23.4721
White blood cell	P<1e-09, r2<0.001 in 10000 kb	rs10006495	G	T	-0.015667	0.001959	1.3499e-15	0.353947	0.000112256	63.9589
		rs10049210	C	T	0.014676	0.001887	7.68953e-15	0.404518	0.000103765	60.4881
		rs10054235	C	A	0.0129	0.001961	4.90004e-11	0.34872	7.55882e-05	43.2736
		rs1007938	G	A	-0.011156	0.001884	3.26002e-09	0.40493	5.99784e-05	35.0634
		rs10087240	T	C	0.019951	0.001855	6.13056e-27	0.457631	0.000197592	115.675
		rs10102877	A	G	-0.013208	0.001997	3.91021e-11	0.684662	7.5328e-05	43.7438
		rs10138752	T	C	-0.040319	0.003453	1.85012e-31	0.077277	0.000231831	136.34
		rs10146962	C	T	-0.015367	0.00197	6.4506e-15	0.338281	0.000105721	60.8477
		rs10164769	T	C	0.027162	0.002111	7.73036e-38	0.74307	0.000281707	165.556
		rs10203838	C	T	0.012292	0.001866	4.66015e-11	0.417873	7.35084e-05	43.3931
		rs1024091	T	C	0.013797	0.001848	8.70964e-14	0.557743	9.39092e-05	55.7396
		rs1033415	G	A	0.012676	0.002046	6.00994e-10	0.650368	7.30743e-05	38.3841
		rs1042725	T	C	0.010899	0.001847	3.70997e-09	0.494933	5.9388e-05	34.8207
		rs1047891	A	C	-0.021105	0.001979	1.59993e-26	0.314955	0.000192207	113.731
		rs10494783	A	G	-0.043813	0.004145	4.42996e-26	0.052086	0.000189551	111.726
		rs10498635	T	C	-0.031169	0.002388	6.57961e-39	0.18322	0.000290773	170.363
		rs10808139	A	G	0.017618	0.002845	6.05996e-10	0.118535	6.48627e-05	38.3484
		rs10808536	A	G	0.011839	0.002018	4.56005e-09	0.295428	5.83495e-05	34.418
		rs10828725	T	G	-0.049726	0.001914	1.09901e-148	0.364782	0.00114592	674.966
		rs10831912	C	T	-0.011409	0.001892	1.69001e-09	0.603794	6.2278e-05	36.3623
		rs10864368	C	T	0.021532	0.001838	1.15001e-31	0.502821	0.000231806	137.239
		rs10872223	T	C	0.014143	0.002394	3.57001e-09	0.18332	5.98928e-05	34.9006
		rs10889574	A	G	-0.043688	0.001998	6.63743e-106	0.356606	0.00087583	478.114
		rs10931934	C	T	0.01504	0.001882	1.38007e-15	0.600163	0.000108562	63.8638
		rs10936588	A	G	-0.014309	0.001909	6.95024e-14	0.636322	9.47638e-05	56.183
		rs10940473	T	C	-0.013587	0.001996	1.03992e-11	0.691742	7.87292e-05	46.3366
		rs10980797	G	A	-0.026981	0.00184	1.18987e-48	0.487935	0.000363775	215.02
		rs10986338	A	G	-0.016612	0.001953	1.93019e-17	0.649839	0.000125588	72.3499
		rs11002309	T	C	0.012677	0.00195	8.27942e-11	0.340114	7.21367e-05	42.2632
		rs11064881	A	G	-0.032266	0.003547	9.91973e-20	0.073548	0.000141878	82.7497
		rs1109278	G	A	-0.014404	0.001932	9.31966e-14	0.483817	0.000103629	55.5841
		rs11104881	C	T	-0.024735	0.002017	1.59001e-34	0.702031	0.000255965	150.387
		rs11169302	G	T	0.018563	0.001889	9.44931e-23	0.392444	0.00016432	96.5675
		rs11198788	C	T	0.011894	0.001855	1.47001e-10	0.430983	6.93859e-05	41.1118
		rs11225017	T	C	0.020081	0.003332	1.72001e-09	0.084236	6.22131e-05	36.3211
		rs11242109	T	G	-0.033069	0.001842	5.08042e-72	0.477227	0.000545645	322.301
		rs11252331	G	T	0.016749	0.00249	1.80011e-11	0.836619	7.66897e-05	45.2457
		rs112750178	C	T	0.015327	0.002179	2.06016e-12	0.23854	8.534e-05	49.4764
		rs113473633	G	A	-0.050832	0.006222	3.23966e-16	0.025546	0.000128644	66.7441
		rs114050631	T	C	-0.138239	0.00975	1.38007e-45	0.011062	0.000418113	201.025
		rs11644125	T	C	-0.017778	0.001893	6.36063e-21	0.59737	0.000152036	88.1989
		rs11651753	T	C	0.011785	0.001856	2.22998e-10	0.429673	6.80693e-05	40.3183
		rs11669443	A	G	0.013882	0.002267	9.49992e-10	0.236724	6.96399e-05	37.4972
		rs11688303	T	C	0.021084	0.002892	3.19007e-13	0.120295	9.40851e-05	53.1506
		rs11723621	G	A	-0.029079	0.002022	7.57007e-47	0.29001	0.00034822	206.821
		rs11735662	T	C	0.052247	0.005162	4.74024e-24	0.033197	0.000175222	102.444
		rs11744663	A	G	-0.018732	0.002351	1.71989e-15	0.190499	0.00010822	63.4836
		rs11854390	T	C	0.013665	0.00186	2.1301e-13	0.562198	9.19213e-05	53.9749
		rs11874453	A	G	-0.011551	0.001904	1.36e-09	0.532635	6.64286e-05	36.8047
		rs11927257	T	C	-0.012877	0.002042	2.97002e-10	0.282198	6.71766e-05	39.7664
		rs11965885	T	G	-0.01534	0.001892	5.41003e-16	0.58175	0.000114513	65.7365
		rs11993347	C	T	-0.01971	0.002186	2.03002e-19	0.230466	0.000137796	81.2964
		rs12138789	C	T	-0.014617	0.00218	2.08018e-11	0.237746	7.74389e-05	44.9575
		rs12142474	G	A	-0.021647	0.003435	3.05e-10	0.086122	7.37612e-05	39.7137
		rs12203592	T	C	0.022394	0.002349	1.6099e-21	0.210255	0.000166543	90.8857
		rs12208224	A	G	0.014125	0.001946	4.05042e-13	0.657979	8.9799e-05	52.6853
		rs12214269	A	G	0.018185	0.001839	5.06058e-23	0.545937	0.000163951	97.7826
		rs1228024	A	C	0.025191	0.001944	2.32006e-38	0.661308	0.000284269	167.918
		rs12376511	C	T	-0.034202	0.002489	6.16027e-43	0.164417	0.000321417	188.822
		rs12429714	T	C	-0.011129	0.001864	2.45002e-09	0.424441	6.05131e-05	35.6467
		rs1245035	A	C	0.014435	0.001914	4.78961e-14	0.627427	9.74178e-05	56.8785
		rs12540307	T	C	-0.038684	0.004464	4.75992e-18	0.048819	0.000138978	75.0953
		rs12550612	A	G	-0.032751	0.00242	1.08993e-41	0.821328	0.000314813	183.154
		rs12580347	C	T	-0.011894	0.001891	3.27997e-10	0.583362	6.87674e-05	39.5614
		rs1260326	C	T	-0.032863	0.001875	9.83105e-69	0.601256	0.000517843	307.192
		rs12630592	T	G	-0.012328	0.001992	6.27004e-10	0.3731	7.1095e-05	38.3005
		rs12683699	G	A	0.021786	0.002517	5.1606e-18	0.160286	0.000127765	74.9181
		rs12784071	T	C	0.018141	0.002233	4.78961e-16	0.222099	0.000113716	65.9999
		rs1285886	A	G	0.026498	0.002326	5.10035e-30	0.196802	0.000221977	129.779
		rs12918121	T	C	-0.051377	0.00721	1.07994e-12	0.017725	9.19151e-05	50.7768
		rs12929950	A	G	-0.030161	0.003616	7.83069e-17	0.077395	0.000129912	69.5717
		rs12936529	T	C	-0.025157	0.001845	2.74031e-42	0.478786	0.000315868	185.919
		rs12956324	A	C	0.013776	0.001875	2.09991e-13	0.402959	9.13148e-05	53.9812
		rs1296703	G	A	0.01425	0.002111	1.51985e-11	0.300958	8.54415e-05	45.5671
		rs12997100	C	T	0.02676	0.00359	9.37994e-14	0.070514	9.38686e-05	55.5625
		rs13132853	G	A	0.020133	0.00193	1.88018e-25	0.355109	0.00018565	108.818
		rs13149209	C	T	-0.014688	0.002228	4.49987e-11	0.217886	7.35283e-05	43.4604
		rs13180726	A	G	-0.02131	0.002441	2.71019e-18	0.825591	0.000130777	76.2131
		rs1322599	T	C	-0.030663	0.002456	9.97011e-36	0.174313	0.000270648	155.873
		rs13248936	G	A	0.013094	0.001841	1.17004e-12	0.498342	8.57255e-05	50.5866
		rs13410405	G	T	0.019134	0.002957	1.01e-10	0.109282	7.12739e-05	41.8704
		rs1366045	C	T	-0.024654	0.001886	5.44001e-39	0.384323	0.000287643	170.879
		rs1371045	C	T	-0.014328	0.002114	1.26009e-11	0.744485	7.8104e-05	45.9367
		rs1371794	C	A	-0.063244	0.001899	1e-200	0.622486	0.00187989	1109.14
		rs145209947	A	C	-0.075356	0.008651	3.19007e-18	0.01404	0.000157214	75.8755
		rs1474419	C	T	0.018298	0.001886	3.11028e-22	0.579762	0.000163148	94.1288
		rs148713124	T	G	0.096379	0.010089	1.3499e-21	0.008951	0.000164802	91.2572
		rs1506609	G	A	0.021031	0.002326	1.6099e-19	0.799464	0.000141821	81.7521
		rs150861794	T	C	-0.065191	0.007096	4.31023e-20	0.020249	0.000168626	84.4008
		rs16850073	T	C	0.042606	0.001922	8.77001e-109	0.374415	0.000850376	491.398
		rs16964983	C	T	0.021856	0.002434	2.89001e-19	0.172918	0.000136634	80.6304
		rs17026212	G	T	-0.014719	0.001834	1.05999e-15	0.513548	0.000108245	64.4105
		rs17041439	C	A	0.037876	0.003999	2.96006e-21	0.056554	0.000153087	89.7065
		rs17209630	A	G	0.014259	0.002045	3.25012e-12	0.281259	8.22029e-05	48.6172
		rs17232826	T	C	-0.021831	0.003087	1.59993e-12	0.10177	8.71334e-05	50.0118
		rs1738074	C	T	-0.020403	0.001853	3.74024e-28	0.567796	0.000204314	121.237
		rs17660636	G	A	0.011343	0.001935	4.67003e-09	0.357796	5.91282e-05	34.3631
		rs17758695	T	C	-0.055946	0.005728	1.66994e-22	0.028609	0.000173966	95.3961
		rs1779809	T	C	0.014395	0.001944	1.35988e-13	0.333689	9.21451e-05	54.8314
		rs180941	A	G	-0.016866	0.001919	1.63005e-18	0.625014	0.00013334	77.2454
		rs182090955	A	G	-0.075776	0.009684	5.32967e-15	0.009784	0.00011126	61.2283
		rs1822534	G	A	-0.025822	0.001882	8.29087e-43	0.394237	0.000318471	188.252
		rs185774696	T	C	-0.028632	0.002693	2.25009e-26	0.273418	0.000325721	113.039
		rs1880390	A	C	-0.012432	0.002042	1.17999e-09	0.29216	6.39246e-05	37.0654
		rs1885474	G	T	-0.021583	0.003031	1.10994e-12	0.102894	8.59978e-05	50.7049
		rs1886654	C	T	-0.057486	0.002959	5.08042e-84	0.892184	0.000635758	377.427
		rs1895994	A	G	-0.012955	0.001964	4.35011e-11	0.32446	7.35728e-05	43.5101
		rs1933295	G	A	-0.015546	0.002311	1.81009e-11	0.776835	8.37958e-05	45.2518
		rs2012011	A	G	-0.025502	0.002683	2.14981e-21	0.136123	0.000152954	90.3453
		rs2012610	T	G	0.027526	0.002769	2.9902e-23	0.127328	0.00016838	98.8186
		rs2038700	C	T	0.034424	0.00189	4.60999e-74	0.394624	0.000566189	331.74
		rs2062250	A	G	0.050625	0.003905	2.11982e-38	0.938363	0.000296464	168.069
		rs2082382	A	G	-0.017857	0.00186	8.66962e-22	0.55412	0.000157568	92.17
		rs2084312	T	C	0.028894	0.002311	7.67008e-36	0.800412	0.000266743	156.32
		rs2091084	C	T	0.01735	0.001951	6.25029e-19	0.653201	0.000136381	79.083
		rs2104415	A	G	-0.012373	0.002061	1.98999e-09	0.676227	6.70368e-05	36.0406
		rs2148537	A	G	0.017567	0.002475	1.31009e-12	0.166266	8.55571e-05	50.3783
		rs2180369	C	T	0.02298	0.003071	7.65068e-14	0.110762	0.000104025	55.9936
		rs2194067	T	C	0.012618	0.001886	2.30994e-11	0.415502	7.73334e-05	44.7606
		rs2241621	C	A	-0.015164	0.001879	7.34007e-16	0.587598	0.000111444	65.1287
		rs2259855	C	T	-0.023612	0.001849	2.66011e-37	0.52533	0.000278048	163.076
		rs2268829	A	G	-0.014138	0.002236	2.65999e-10	0.784789	6.75186e-05	39.9789
		rs2282677	C	T	0.01138	0.001929	3.79001e-09	0.405364	6.24325e-05	34.8031
		rs2282986	C	T	-0.124348	0.006855	1.80011e-73	0.018529	0.000562389	329.049
		rs2286599	A	G	0.03864	0.00279	1.42988e-43	0.141477	0.000362695	191.807
		rs2290669	C	A	-0.047616	0.002308	1.51985e-94	0.786444	0.00076158	425.63
		rs2298695	C	A	-0.015731	0.001881	6.51028e-17	0.396473	0.000118428	69.9413
		rs2312675	C	T	-0.017557	0.002242	5.10975e-15	0.211587	0.000102843	61.3236
		rs2314339	T	C	0.027194	0.002851	1.51985e-21	0.124894	0.000161651	90.9809
		rs2327028	T	C	-0.013484	0.001851	3.3597e-13	0.475724	9.06948e-05	53.0668
		rs2358581	G	T	-0.028224	0.002196	9.36052e-38	0.73286	0.000311908	165.185
		rs2371108	T	G	0.019217	0.001891	3.11028e-24	0.388965	0.000175541	103.273
		rs2412771	C	T	-0.018201	0.001883	4.41977e-22	0.416739	0.000161045	93.4304
		rs2432142	A	G	0.012676	0.001864	1.08993e-11	0.433689	7.89274e-05	46.2457
		rs2439963	G	A	-0.01238	0.002091	3.29003e-09	0.736551	5.948e-05	35.0535
		rs2469147	G	A	-0.015295	0.002536	1.67001e-09	0.157884	6.2207e-05	36.3747
		rs2476601	G	A	0.052755	0.003045	3.34965e-67	0.899826	0.000501731	300.159
		rs247826	T	C	0.033815	0.002233	9.58959e-52	0.220606	0.000393209	229.319
		rs2494747	T	G	0.012889	0.001993	1.03999e-10	0.614948	7.86731e-05	41.8237
		rs2506699	G	A	0.01427	0.001892	4.86968e-14	0.483895	0.000101711	56.8858
		rs2519093	T	C	-0.04119	0.002367	8.55067e-68	0.185612	0.000512922	302.821
		rs2561758	G	A	-0.03629	0.00208	4.20049e-68	0.723119	0.00052736	304.401
		rs257063	T	C	-0.013818	0.0021	4.91021e-11	0.740602	7.33621e-05	43.2962
		rs2615061	A	G	-0.027637	0.002854	3.82032e-22	0.117457	0.000158353	93.7718
		rs2617802	G	T	-0.014966	0.002338	1.59001e-10	0.206943	7.35185e-05	40.9752
		rs2665405	A	G	0.035373	0.001844	5.62989e-82	0.547743	0.00061992	367.977
		rs2710804	C	T	0.020606	0.001897	1.91999e-27	0.375925	0.00019923	117.992
		rs2713573	T	C	0.024566	0.001984	3.46019e-35	0.689211	0.000258533	153.315
		rs2729707	G	A	-0.030932	0.002446	1.27997e-36	0.830063	0.000269926	159.92
		rs2790122	C	T	0.013402	0.002029	4.08037e-11	0.712432	7.35958e-05	43.6288
		rs284317	G	A	0.017425	0.001945	3.51965e-19	0.497553	0.000151812	80.261
		rs28530750	A	G	0.055643	0.004613	1.83021e-33	0.043032	0.000255	145.497
		rs28571765	C	T	-0.02207	0.00237	1.32008e-20	0.206778	0.000159784	86.7174
		rs28574812	G	A	-0.016041	0.002537	2.65999e-10	0.15791	6.84323e-05	39.9779
		rs28576226	A	G	0.031285	0.002853	6.14045e-28	0.122129	0.000209871	120.245
		rs2857633	C	T	-0.013283	0.002098	2.52e-10	0.727142	7.00129e-05	40.0848
		rs2875974	A	G	0.021365	0.001904	3.53997e-29	0.373406	0.000213601	125.913
		rs28853644	T	C	-0.017676	0.002074	1.63983e-17	0.272022	0.000123743	72.6355
		rs2904270	A	G	-0.015318	0.001844	1.02991e-16	0.517092	0.000117183	69.005
		rs2935104	G	A	0.01955	0.003311	3.62001e-09	0.906903	6.45387e-05	34.8637
		rs2993986	T	C	0.030146	0.00219	4.75007e-43	0.774092	0.000317844	189.483
		rs301819	G	A	-0.015802	0.00187	3.12033e-17	0.582558	0.000121448	71.4068
		rs303753	A	G	-0.019587	0.00196	1.77992e-23	0.34473	0.000173327	99.867
		rs309190	C	T	-0.030461	0.003167	7.05018e-22	0.893852	0.000176074	92.5104
		rs3184504	C	T	-0.067191	0.001836	1e-200	0.517084	0.00225468	1339.29
		rs34202160	G	T	-0.015	0.001931	8.34065e-15	0.357836	0.000103405	60.3415
		rs342294	C	T	-0.017407	0.001848	4.90004e-21	0.455851	0.000150321	88.7243
		rs34298354	T	C	-0.024205	0.002801	5.90065e-18	0.123549	0.000126884	74.6762
		rs34505104	G	A	-0.02041	0.002056	3.3597e-23	0.304866	0.00017656	98.5458
		rs34562738	A	G	0.018655	0.002195	1.99022e-17	0.77203	0.000122499	72.2304
		rs34599082	T	C	-0.151481	0.008129	1.93019e-77	0.013363	0.000605073	347.249
		rs34952318	A	G	-0.033097	0.004378	4.24033e-14	0.050283	0.000104622	57.151
		rs35112940	A	G	-0.025968	0.002241	5.20955e-31	0.215982	0.000228376	134.274
		rs35571080	C	T	0.024903	0.002243	1.32008e-28	0.212693	0.000207697	123.266
		rs35592645	A	C	0.017479	0.00213	2.38013e-16	0.248719	0.000114176	67.3399
		rs35734242	C	T	0.02176	0.001948	6.29941e-29	0.427987	0.000231838	124.778
		rs35755865	T	C	-0.041492	0.005077	3.1798e-16	0.034195	0.000113713	66.7902
		rs35990176	C	A	0.011569	0.001871	6.45996e-10	0.451059	6.62797e-05	38.2334
		rs3731332	T	C	-0.121199	0.00624	5.52968e-84	0.023234	0.000666719	377.248
		rs3732378	A	G	0.020274	0.00243	7.70016e-17	0.172487	0.000117338	69.6089
		rs3735485	G	A	0.041036	0.00257	2.33991e-57	0.844672	0.000441873	254.954
		rs3747869	C	A	0.038842	0.00322	1.79019e-33	0.900449	0.000270482	145.509
		rs3754224	C	T	-0.014577	0.002103	4.30031e-12	0.270936	8.39457e-05	48.0459
		rs3773312	A	G	0.017874	0.00285	3.67003e-10	0.134067	7.41788e-05	39.3325
		rs3781454	A	G	0.025211	0.002007	3.67959e-36	0.676766	0.000278077	157.792
		rs3795503	T	C	-0.015409	0.00201	1.83021e-14	0.314627	0.0001024	58.7699
		rs3812849	C	A	0.01961	0.002086	5.85059e-21	0.266532	0.000150354	88.3741
		rs3847147	A	G	-0.011891	0.002003	2.98999e-09	0.306976	6.01616e-05	35.243
		rs38859	T	C	0.011328	0.001851	9.71002e-10	0.448861	6.34906e-05	37.4535
		rs4074672	T	C	0.018004	0.001907	3.8699e-21	0.369536	0.000151038	89.1323
		rs41272536	G	A	-0.034443	0.004735	3.65006e-13	0.045737	0.000103554	52.9127
		rs41295055	T	C	-0.013749	0.002349	4.94994e-09	0.186956	5.74679e-05	34.259
		rs41317014	T	C	-0.020075	0.002239	3.25012e-19	0.247562	0.00015014	80.3898
		rs4239149	G	A	0.016302	0.001945	5.57956e-17	0.656343	0.000119886	70.2491
		rs4276676	C	T	-0.019264	0.001849	2.22024e-25	0.469209	0.000184847	108.547
		rs4391200	G	A	0.022974	0.001894	7.85959e-34	0.618964	0.000248963	147.134
		rs447124	T	C	0.016995	0.001853	4.85959e-20	0.490566	0.000144364	84.1182
		rs4535497	A	C	-0.013323	0.001992	2.33991e-11	0.570032	8.70101e-05	44.7325
		rs464609	A	G	0.012934	0.001852	2.99985e-12	0.544492	8.29819e-05	48.7733
		rs4666068	G	A	-0.011907	0.001846	1.15001e-10	0.508945	7.08656e-05	41.6044
		rs4703541	A	G	-0.036192	0.002813	7.45075e-38	0.878793	0.000279042	165.533
		rs4704826	A	C	-0.015601	0.001876	9.70957e-17	0.633681	0.000112997	69.1572
		rs4707609	C	T	-0.021092	0.001914	3.20996e-28	0.360123	0.000205028	121.437
		rs4721659	G	T	-0.018417	0.002804	5.30029e-11	0.122848	7.30989e-05	43.14
		rs4729046	C	T	-0.036605	0.003489	1.00995e-25	0.924065	0.000188042	110.072
		rs47341	T	C	0.015865	0.001975	1.00995e-15	0.396441	0.00012045	64.5274
		rs4734879	G	A	-0.021974	0.002057	1.33999e-26	0.276159	0.000193041	114.116
		rs4760	G	A	-0.070234	0.002594	2.208e-161	0.152719	0.00127657	733.083
		rs4761234	C	T	0.015191	0.001847	2.03002e-16	0.4824	0.00011524	67.6453
		rs4789229	T	C	0.011726	0.001926	1.17999e-09	0.644533	6.30049e-05	37.0668
		rs4790752	T	C	-0.017539	0.001845	2.11009e-21	0.450783	0.000152318	90.3681
		rs4794820	G	A	0.07212	0.001861	1e-200	0.552137	0.00257237	1501.82
		rs4805881	C	A	-0.01642	0.001984	1.32008e-16	0.665284	0.000120077	68.4954
		rs4844390	G	A	-0.026549	0.002216	4.9705e-33	0.220218	0.000242076	143.534
		rs4903580	T	C	0.016091	0.001845	2.93022e-18	0.456246	0.000128469	76.0627
		rs4909932	G	A	0.013829	0.001881	2.01002e-13	0.59811	9.1939e-05	54.0508
		rs4924450	A	G	0.01369	0.002122	1.13999e-10	0.706498	7.77247e-05	41.6212
		rs4925756	T	C	-0.014563	0.002004	3.83001e-13	0.691881	9.04236e-05	52.8086
		rs4948097	G	A	-0.017568	0.002148	3.0297e-16	0.758343	0.00011312	66.8921
		rs4984768	T	G	0.011987	0.002025	3.34003e-09	0.36339	6.6481e-05	35.0404
		rs520910	C	T	-0.024764	0.003685	1.86982e-11	0.067393	7.70877e-05	45.1612
		rs527393	A	G	-0.02209	0.001842	4.3401e-33	0.467803	0.000242972	143.817
		rs533483	A	G	-0.017399	0.002188	1.90985e-15	0.243389	0.000111494	63.2343
		rs549302	A	G	0.020151	0.001843	8.48008e-28	0.545007	0.000201386	119.548
		rs55671712	T	C	0.018588	0.003119	2.59e-09	0.095812	5.98651e-05	35.5167
		rs55767800	C	T	-0.018378	0.002003	4.70977e-20	0.632257	0.00015706	84.1846
		rs55964818	C	T	-0.036254	0.00186	1.53993e-84	0.567337	0.000645257	379.913
		rs560194	C	T	-0.013586	0.001843	1.75995e-13	0.530014	9.19571e-05	54.3414
		rs56121005	T	C	0.040171	0.006769	3.02998e-09	0.022606	7.13097e-05	35.2188
		rs56188865	C	T	-0.027014	0.001899	7.00003e-46	0.374222	0.000341788	202.361
		rs56378716	G	A	0.107631	0.008291	1.69981e-38	0.01278	0.000292314	168.523
		rs56388170	T	G	0.059326	0.002043	2.72898e-185	0.294509	0.00146255	843.241
		rs571497	A	G	-0.036357	0.002584	6.31975e-45	0.154843	0.000345967	197.965
		rs5746451	C	T	0.019536	0.001849	4.60999e-26	0.504194	0.000190814	111.634
		rs5746990	A	G	-0.015117	0.001903	2.05022e-15	0.622693	0.000107382	63.1033
		rs579721	A	G	-0.012287	0.002033	1.54999e-09	0.283654	6.13527e-05	36.5271
		rs59085061	G	A	-0.050292	0.004692	8.99912e-27	0.040472	0.000196445	114.889
		rs60190483	C	T	-0.031395	0.003962	2.42996e-15	0.057277	0.000106443	62.79
		rs60466842	A	C	-0.029716	0.003269	1.03992e-19	0.087587	0.000141137	82.6322
		rs6051431	T	C	0.011858	0.001931	8.43995e-10	0.351093	6.40704e-05	37.71
		rs6055955	T	C	-0.022202	0.001845	2.63027e-33	0.508614	0.000246391	144.807
		rs6059938	A	G	0.010816	0.001846	4.74002e-09	0.486431	5.84498e-05	34.3296
		rs60695341	T	C	-0.029901	0.002312	3.19963e-38	0.197348	0.000283244	167.261
		rs61863767	T	C	0.043116	0.001874	4.56037e-117	0.596247	0.000895053	529.342
		rs62007171	C	T	-0.015451	0.002058	6.22014e-14	0.291138	9.8538e-05	56.3665
		rs62089697	A	G	0.017652	0.002518	2.48028e-12	0.172097	8.87913e-05	49.1445
		rs62270938	T	C	0.016035	0.002454	6.59022e-11	0.177104	7.49448e-05	42.696
		rs62311395	G	A	-0.025247	0.003841	5.08979e-11	0.061901	7.4028e-05	43.2045
		rs62387565	T	C	0.014243	0.001842	1.10002e-14	0.484022	0.000101328	59.7891
		rs62466318	T	C	-0.021214	0.002399	9.79941e-19	0.202209	0.000145199	78.1957
		rs62510269	G	A	-0.036092	0.002609	1.77011e-43	0.14573	0.000324337	191.369
		rs630505	C	T	0.012464	0.002102	3.12997e-09	0.265394	6.05746e-05	35.1599
		rs6421984	C	T	0.038666	0.001952	2.78997e-87	0.514549	0.000746897	392.371
		rs6429582	C	T	-0.018823	0.001853	3.25012e-24	0.435077	0.000174166	103.187
		rs6440732	A	C	0.023275	0.002437	1.3499e-21	0.827718	0.000154501	91.2151
		rs6445826	C	T	0.01247	0.001887	4.02995e-11	0.498475	7.77497e-05	43.6704
		rs6474514	C	T	0.011055	0.001872	3.58996e-09	0.41173	5.9202e-05	34.8742
		rs6476883	A	G	-0.011492	0.001857	6.27004e-10	0.437247	6.49929e-05	38.2971
		rs6479830	C	T	-0.012414	0.002033	1.05e-09	0.715242	6.27744e-05	37.2861
		rs6500550	T	C	-0.02072	0.002036	2.64972e-24	0.304495	0.00018184	103.567
		rs6502721	T	C	0.012921	0.002008	1.28e-10	0.678095	7.28854e-05	41.406
		rs6554195	T	G	-0.019466	0.00184	3.90032e-26	0.483581	0.000189258	111.922
		rs6583435	A	C	0.016915	0.001968	8.69961e-18	0.679683	0.000124583	73.8741
		rs6667709	T	C	-0.013844	0.001923	6.29941e-13	0.370088	8.9359e-05	51.8278
		rs672058	T	C	0.018163	0.002846	1.81001e-10	0.880458	6.94439e-05	40.729
		rs6734238	G	A	0.036475	0.001959	2.59e-77	0.402192	0.000639758	346.673
		rs67364818	A	G	0.021905	0.003451	2.26001e-10	0.084959	7.46047e-05	40.2898
		rs6755895	C	T	-0.023327	0.002239	2.13993e-25	0.231769	0.000193774	108.545
		rs6831590	T	G	-0.0184	0.001904	4.54046e-22	0.367282	0.000157353	93.39
		rs6854855	G	A	0.016404	0.001855	9.68947e-19	0.486909	0.000134453	78.2006
		rs6877725	C	T	-0.020573	0.00186	2.11982e-28	0.445441	0.000209104	122.34
		rs6878780	C	T	0.013254	0.001858	1.02e-12	0.426771	8.59502e-05	50.8863
		rs6924387	G	A	0.016547	0.001881	1.48013e-18	0.412477	0.000132707	77.3855
		rs6948695	C	T	-0.010993	0.001875	4.70002e-09	0.413883	5.86306e-05	34.3739
		rs696	T	C	0.015003	0.001912	4.53002e-15	0.36576	0.000104433	61.5714
		rs6985508	A	G	-0.026558	0.002018	1.57e-39	0.357998	0.000324218	173.2
		rs7005996	T	C	0.024146	0.003326	4.05976e-13	0.906282	9.90391e-05	52.7041
		rs703005	T	C	-0.015482	0.001905	4.54988e-16	0.598155	0.000115228	66.0484
		rs7036656	T	C	0.028141	0.002055	1.24997e-42	0.7215	0.000318252	187.523
		rs706809	C	T	0.022341	0.002258	4.70977e-23	0.777872	0.000172483	97.8939
		rs7082470	A	G	-0.029017	0.00184	5.75043e-56	0.474125	0.000419866	248.695
		rs7159281	G	A	-0.01285	0.002	1.34999e-10	0.671781	7.28161e-05	41.2805
		rs7177	A	C	-0.013376	0.001888	1.42988e-12	0.529439	8.91486e-05	50.1934
		rs7183988	G	T	-0.015777	0.001895	8.73977e-17	0.526631	0.000124104	69.3153
		rs718515	A	G	-0.016391	0.001858	1.20005e-18	0.551929	0.000132883	77.8248
		rs7198940	T	C	0.015619	0.001851	3.32966e-17	0.52238	0.000121732	71.202
		rs7225843	C	T	-0.03151	0.002297	8.58025e-43	0.203083	0.000321376	188.18
		rs7246841	C	T	0.022477	0.002216	3.78007e-24	0.731395	0.000198506	102.881
		rs72664840	T	C	0.020614	0.002397	8.43918e-18	0.179041	0.000124919	73.9583
		rs72726027	C	T	-0.04262	0.002923	4.16965e-48	0.111895	0.000361021	212.602
		rs72747074	A	G	0.017932	0.002003	3.62994e-19	0.31238	0.00013814	80.1482
		rs72780125	C	T	0.034599	0.002765	6.74994e-36	0.131112	0.000272749	156.58
		rs72790862	C	T	-0.025833	0.002003	5.0501e-38	0.306947	0.000283929	166.336
		rs72836628	T	C	-0.01417	0.002131	3.01995e-11	0.249186	7.51321e-05	44.2152
		rs72978754	C	T	-0.028441	0.003727	2.45019e-14	0.065813	9.94638e-05	58.233
		rs73028871	T	C	-0.016816	0.002745	9.29994e-10	0.133879	6.55792e-05	37.5283
		rs73036517	G	A	-0.052727	0.00211	1.07895e-137	0.258764	0.00106649	624.453
		rs7308123	C	T	0.018607	0.002436	2.28981e-14	0.18119	0.000102731	58.3441
		rs73190675	A	G	0.028802	0.004241	1.15001e-11	0.050278	7.92227e-05	46.1219
		rs73191188	A	G	-0.016477	0.001926	1.22999e-17	0.353128	0.000124033	73.1884
		rs7326825	A	G	0.020659	0.002021	1.72982e-24	0.703613	0.000178009	104.492
		rs73444596	G	A	0.020822	0.003355	5.60003e-10	0.082319	6.55038e-05	38.5175
		rs739842	C	T	-0.015546	0.001973	3.44033e-15	0.639495	0.000111433	62.0843
		rs74076327	C	T	-0.028663	0.004475	1.54999e-10	0.04472	7.01949e-05	41.0257
		rs74607840	A	G	-0.015405	0.001914	8.82064e-16	0.625943	0.000111129	64.7796
		rs7502100	C	T	0.017816	0.001955	8.4004e-20	0.366802	0.000147442	83.0473
		rs75354229	T	C	0.02445	0.002749	6.22014e-19	0.128659	0.000134034	79.1055
		rs7549164	T	C	0.025162	0.002456	1.33015e-24	0.189126	0.000194189	104.962
		rs755951	C	A	-0.013467	0.001888	1.02e-12	0.402765	8.72507e-05	50.8787
		rs7573465	T	G	0.035796	0.001853	4.66015e-83	0.554185	0.000633153	373.178
		rs75859969	C	A	-0.016697	0.002549	5.94019e-11	0.156224	7.34991e-05	42.9077
		rs759488	C	T	0.013512	0.002025	2.57988e-11	0.70489	7.59582e-05	44.5233
		rs763227	A	G	0.01366	0.002274	1.93001e-09	0.786053	6.27609e-05	36.0844
		rs7639292	T	C	-0.023984	0.002466	2.48028e-22	0.168472	0.000161168	94.5922
		rs76428106	C	T	0.158445	0.008517	3.44985e-77	0.013471	0.000667263	346.085
		rs7705526	A	C	0.029089	0.00212	8.30042e-43	0.327218	0.000372562	188.271
		rs7751717	A	G	-0.013802	0.002306	2.22998e-09	0.199529	6.08507e-05	35.8232
		rs7776054	G	A	-0.04663	0.002089	2.47742e-110	0.261097	0.000838977	498.256
		rs7776857	T	G	-0.018545	0.001949	1.89017e-21	0.65805	0.000154777	90.5375
		rs778125	G	A	0.01436	0.00192	7.74997e-14	0.355448	9.44872e-05	55.9377
		rs7781268	A	G	-0.01333	0.002258	3.65999e-09	0.245805	6.58817e-05	34.8506
		rs77912140	G	A	0.027046	0.004483	1.66001e-09	0.044419	6.20972e-05	36.3971
		rs7792934	G	A	-0.015064	0.002287	4.69029e-11	0.789209	7.55013e-05	43.3857
		rs780142	G	T	0.014549	0.002067	2.02023e-12	0.274035	8.42205e-05	49.5432
		rs78208917	G	A	0.025803	0.003201	7.97995e-16	0.090155	0.000109226	64.9782
		rs7855091	A	G	0.014823	0.001994	1.10994e-13	0.307022	9.34956e-05	55.2612
		rs7864482	G	A	0.012766	0.001902	1.99986e-11	0.377314	7.65794e-05	45.0492
		rs7917772	A	G	0.016558	0.001904	3.59998e-18	0.630809	0.000127701	75.6276
		rs79237520	T	C	0.040077	0.006305	2.13e-10	0.022751	7.1421e-05	40.4035
		rs79272926	A	C	-0.022316	0.002222	1.03992e-23	0.221625	0.000171819	100.866
		rs7934719	T	C	0.017862	0.001873	1.54989e-21	0.414299	0.000154839	90.9459
		rs796003	T	G	-0.025352	0.002125	8.84097e-33	0.258407	0.000246334	142.333
		rs796056	C	A	0.020577	0.001898	2.30994e-27	0.623451	0.000198801	117.536
		rs79716587	A	G	-0.035863	0.00283	9.21934e-37	0.124095	0.000279598	160.59
		rs798555	C	T	0.018842	0.002054	4.8095e-20	0.294964	0.00014766	84.1495
		rs8084255	T	C	0.019947	0.001905	1.26009e-25	0.375635	0.000186634	109.639
		rs8176528	A	G	-0.016872	0.002017	6.30957e-17	0.297384	0.000118959	69.9713
		rs830623	C	A	0.014483	0.002457	3.87998e-09	0.169687	5.91068e-05	34.746
		rs832190	T	C	-0.013264	0.001909	3.87972e-12	0.633275	8.17169e-05	48.2765
		rs8705	A	G	-0.026397	0.002004	1.3499e-39	0.316569	0.00030151	173.505
		rs9313822	A	G	0.025101	0.004098	9.34997e-10	0.052082	6.22115e-05	37.5177
		rs9323285	A	C	0.012057	0.001962	8.18993e-10	0.337997	6.50551e-05	37.7641
		rs935655	G	T	0.014783	0.002161	8.10961e-12	0.761993	7.92676e-05	46.7966
		rs9375447	G	A	-0.013767	0.001834	6.34016e-14	0.494601	9.47541e-05	56.348
		rs9390461	G	A	0.015366	0.001845	8.50942e-17	0.538265	0.000117366	69.3629
		rs9429767	A	G	0.017446	0.002344	1.02991e-13	0.197243	9.63846e-05	55.3956
		rs9430574	A	G	-0.014039	0.001984	1.54989e-12	0.33041	8.72096e-05	50.0711
		rs9487043	T	C	0.023076	0.001839	4.35011e-36	0.486515	0.000266057	157.455
		rs9508005	G	T	-0.022531	0.003425	4.9204e-11	0.094159	8.65974e-05	43.2751
		rs9526795	C	T	-0.01411	0.002116	2.67979e-11	0.258932	7.64061e-05	44.4653
		rs9656395	G	A	-0.027515	0.003156	2.9703e-18	0.095026	0.000130211	76.0087
		rs9697459	T	C	0.013925	0.002225	4e-10	0.225296	6.76877e-05	39.1678
		rs9819371	T	C	-0.044448	0.003776	5.94019e-32	0.064757	0.000239302	138.56
		rs9829114	A	G	-0.033578	0.001872	7.45075e-72	0.414149	0.000547121	321.734
		rs9863	C	T	-0.018749	0.001965	1.53003e-21	0.329292	0.000155275	91.0394
		rs9867398	T	C	0.022319	0.003192	2.80027e-12	0.094175	8.49883e-05	48.8902
		rs987107	A	G	0.020353	0.002093	2.52e-22	0.261079	0.000159829	94.562
		rs9900613	T	C	-0.011338	0.001867	1.29999e-09	0.43077	6.30429e-05	36.8793
		rs9925985	C	A	-0.014131	0.002078	1.08993e-11	0.269481	7.86204e-05	46.2438
		rs9926183	T	C	0.018579	0.002197	2.86022e-17	0.26273	0.000133724	71.5126
		rs9933582	G	T	0.021463	0.002238	9.1791e-22	0.229622	0.000162978	91.9727
		rs9977672	A	G	-0.021872	0.002122	7.07946e-25	0.259116	0.000183676	106.239
Note and abbreviations: Beta, effect size; DC, dendritic cell; EA, effect allele; EAF, effect allele frequency; F statistic, indicates the strength of the instrument variables; IV, instrumental variable; OA, other allele; R2, proportion of variance in exposure variable explained by SNP; SE, standard error; SNP, single nucleotide polymorphism.

## Sheet: S3
Table s3. Effect estimates of causal associations between circulating immune cells and periodontitis risk.
Trait	Method	nSNP	Beta	Se	pval	OR, 95%CI	R2	F-statistic
B cell	IVW	7	0.057	0.043	0.182	1.06(0.97,1.15)	0.0674359	32.3214
	MR Egger	7	0.014	0.067	0.846	1.01(0.89,1.16)
	Weighted median	7	0.045	0.056	0.423	1.05(0.94,1.17)
	Maximum likelihood	7	0.058	0.043	0.185	1.06(0.97,1.15)
	MR-PRESSO	7	0.057	0.034	0.143078	1.06(0.99,1.13)
Basophil	IVW	130	0.068	0.085	0.425	1.07(0.91,1.26)	0.0350774	130.204
	MR Egger	130	-0.101	0.174	0.562	0.90(0.64,1.27)
	Weighted median	130	0.005	0.126	0.971	1.00(0.79,1.29)
	Maximum likelihood	130	0.069	0.08	0.392	1.07(0.92,1.25)
	MR-PRESSO	130	0.068	0.085	0.426602	1.07(0.91,1.26)
CD4+ Regulatory T	IVW	10	0.017	0.048	0.72	1.02(0.93,1.12)	0.0835488	30.9416
	MR Egger	10	0.162	0.081	0.081	1.18(1.00,1.38)
	Weighted median	10	0.013	0.062	0.839	1.01(0.90,1.14)
	Maximum likelihood	10	0.018	0.045	0.686	1.02(0.93,1.11)
	MR-PRESSO	10	0.017	0.048	0.728183	1.02(0.93,1.12)
CD4+ T cell	IVW	10	0.033	0.033	0.314	1.03(0.97,1.10)	0.0772702	30.4901
	MR Egger	10	0.076	0.044	0.121	1.08(0.99,1.18)
	Weighted median	10	0.072	0.045	0.112	1.07(0.98,1.17)
	Maximum likelihood	10	0.033	0.032	0.304	1.03(0.97,1.10)
	MR-PRESSO	10	0.033	0.033	0.33983	1.03(0.97,1.10)
CD8+ T cell	IVW	5	-0.045	0.076	0.556	0.96(0.82,1.11)	0.0478142	36.6169
	MR Egger	5	0.039	0.314	0.909	1.04(0.56,1.92)
	Weighted median	5	0	0.095	0.996	1.00(0.83,1.21)
	Maximum likelihood	5	-0.045	0.077	0.555	0.96(0.82,1.11)
	MR-PRESSO	5	-0.045	0.058	0.484306	0.96(0.85,1.07)
Dendritic Cell	IVW	11	-0.048	0.042	0.25	0.95(0.88,1.03)	0.240606	89.0517
	MR Egger	11	-0.046	0.086	0.608	0.96(0.81,1.13)
	Weighted median	11	-0.103	0.056	0.069	0.90(0.81,1.01)
	Maximum likelihood	11	-0.048	0.042	0.255	0.95(0.88,1.04)
	MR-PRESSO	11	-0.048	0.038	0.240154	0.95(0.88,1.03)
Eosinophil	IVW	307	0.008	0.046	0.856	1.01(0.92,1.10)	0.0968842	168.385
	MR Egger	307	-0.096	0.091	0.289	0.91(0.76,1.08)
	Weighted median	307	-0.042	0.075	0.572	0.96(0.83,1.11)
	Maximum likelihood	307	0.008	0.046	0.855	1.01(0.92,1.10)
	MR-PRESSO	307	0.008	0.046	0.856015	1.01(0.92,1.10)
Lymphocyte	IVW	362	-0.041	0.05	0.405	0.96(0.87,1.06)	0.0879943	130.718
	MR Egger	362	0.063	0.109	0.566	1.06(0.86,1.32)
	Weighted median	362	-0.011	0.079	0.891	0.99(0.85,1.15)
	Maximum likelihood	362	-0.042	0.047	0.379	0.96(0.87,1.05)
	MR-PRESSO	362	-0.041	0.05	0.405907	0.96(0.87,1.06)
Memory B cell	IVW	9	-0.004	0.063	0.952	1.00(0.88,1.13)	0.0839545	37.128
	MR Egger	9	-0.005	0.093	0.962	1.00(0.83,1.19)
	Weighted median	9	0.068	0.065	0.3	1.07(0.94,1.22)
	Maximum likelihood	9	-0.004	0.047	0.928	1.00(0.91,1.09)
	MR-PRESSO	9	-0.004	0.063	0.953858	1.00(0.88,1.13)
	Radial MR	8	0.075	0.05	0.135	1.08(0.98,1.19)
Monocyte	IVW	377	-0.032	0.041	0.445	0.97(0.89,1.05)	0.141556	220.075
	MR Egger	377	0.081	0.071	0.252	1.08(0.94,1.25)
	Weighted median	377	0.109	0.067	0.102	1.11(0.98,1.27)
	Maximum likelihood	377	-0.031	0.038	0.409	0.97(0.90,1.04)
	MR-PRESSO	377	-0.032	0.041	0.445882	0.97(0.89,1.05)
	Radial MR	356	-0.016	0.039	0.671	0.98(0.91,1.06)
Myeloid DC	IVW	12	-0.022	0.041	0.589	0.98(0.90,1.06)	0.303886	110.592
	MR Egger	12	0.006	0.095	0.951	1.01(0.84,1.21)
	Weighted median	12	0.005	0.053	0.918	1.01(0.91,1.12)
	Maximum likelihood	12	-0.022	0.041	0.591	0.98(0.90,1.06)
	MR-PRESSO	12	-0.022	0.034	0.526235	0.98(0.92,1.05)
Natural Killer	IVW	4	0.052	0.064	0.412	1.05(0.93,1.19)	0.049987	47.9869
	MR Egger	4	-0.024	0.165	0.897	0.98(0.71,1.35)
	Weighted median	4	0.067	0.069	0.333	1.07(0.93,1.23)
	Maximum likelihood	4	0.052	0.064	0.413	1.05(0.93,1.19)
	MR-PRESSO	4	0.052	0.049	0.368827	1.05(0.96,1.16)
Natural Killer T	IVW	12	0.084	0.039	0.03	1.09(1.01,1.17)	0.148789	48.9729
	MR Egger	12	0.052	0.093	0.589	1.05(0.88,1.26)
	Weighted median	12	0.084	0.048	0.083	1.09(0.99,1.19)
	Maximum likelihood	12	0.085	0.039	0.03	1.09(1.01,1.18)
	MR-PRESSO	12	0.084	0.029	0.0137068	1.09(1.03,1.15)
Neutrophil	IVW	303	0.105	0.052	0.042	1.11(1.00,1.23)	0.0752266	124.227
	MR Egger	303	0.051	0.112	0.648	1.05(0.85,1.31)
	Weighted median	303	0.051	0.088	0.56	1.05(0.89,1.25)
	Maximum likelihood	303	0.107	0.052	0.041	1.11(1.00,1.23)
	MR-PRESSO	303	0.105	0.05	0.034797	1.11(1.01,1.22)
Plasmacytoid DC	IVW	4	0.12	0.054	0.025	1.13(1.02,1.25)	0.0551591	35.2214
	MR Egger	4	0.086	0.089	0.438	1.09(0.91,1.30)
	Weighted median	4	0.11	0.065	0.087	1.12(0.98,1.27)
	Maximum likelihood	4	0.121	0.056	0.03	1.13(1.01,1.26)
	MR-PRESSO	4	0.12	0.029	0.0260961	1.13(1.06,1.19)
T cell	IVW	8	-0.008	0.076	0.92	0.99(0.85,1.15)	0.0592123	28.6688
	MR Egger	8	-0.015	0.179	0.935	0.99(0.69,1.40)
	Weighted median	8	-0.013	0.082	0.87	0.99(0.84,1.16)
	Maximum likelihood	8	-0.008	0.056	0.883	0.99(0.89,1.11)
	MR-PRESSO	8	-0.008	0.076	0.922375	0.99(0.85,1.15)
White blood cell	IVW	362	0.08	0.048	0.096	1.08(0.99,1.19)	0.0873258	123.247
	MR Egger	362	0.081	0.103	0.435	1.08(0.89,1.33)
	Weighted median	362	0.037	0.081	0.654	1.04(0.88,1.22)
	Maximum likelihood	362	0.08	0.048	0.097	1.08(0.99,1.19)
	MR-PRESSO	362	0.08	0.048	0.0965257	1.08(0.99,1.19)
Abbreviations: CI, confidence interval; DC, dendritic cell; IVW, inverse variance weighted; MR, Mendelian randomization; MR-PRESSO, MR Pleiotropy RESidual Sum and Outlier; OR, odds ratio; SE, standard error; SNP, single nucleotide polymorphism.

## Sheet: S4
Table s4. The heterogeneity and horizontal pleiotropy of the main results using Cochran's Q statistics and MR-Egger intercept.
Trait	Cochran's Q statistics				MR egger
	Q val	Q df	pval		Intercept	Se	pval
B cell	3.77	6	0.707		0.012	0.015	0.44
Basophil	147.09	129	0.132		0.005	0.004	0.267
CD4+ Regulatory T	10.61	9	0.303		-0.046	0.022	0.065
CD4+ T cell	9.44	9	0.398		-0.017	0.012	0.189
CD8+ T cell	2.34	4	0.674		-0.013	0.048	0.801
Dendritic Cell	8.49	10	0.581		-0.001	0.019	0.978
Eosinophil	309.62	306	0.431		0.003	0.003	0.182
Lymphocyte	401.92	361	0.068		-0.003	0.003	0.285
Memory B cell	16.55	8	0.035		0	0.024	0.99
Monocyte	445.31	376	0.008		-0.004	0.002	0.051
Myeloid DC	7.51	11	0.757		-0.006	0.02	0.75
Natural Killer	1.81	3	0.612		0.019	0.038	0.665
Natural Killer T	6.06	11	0.869		0.009	0.023	0.708
Neutrophil	277.26	302	0.843		0.001	0.003	0.583
Plasmacytoid DC	0.89	3	0.828		0.01	0.021	0.683
T cell	13.83	7	0.054		0.002	0.033	0.964
White blood cell	359.61	361	0.511		0	0.002	0.994
Abbreviations: DC, dendritic cell.

## Sheet: S5
Table s5. Effect estimates of causal associations after excluding outliers in RadialMR for two features with considerable heterogeneity.
Trait	Method	nSNP	Beta	Se	pval	OR, 95%CI	Het pval	Pleio pval	F-statistic
Memory B cell	IVW	8	0.075	0.05	0.135	1.08(0.98,1.19)	0.461	0.648	31.2448
	MR Egger	8	0.098	0.071	0.215	1.10(0.96,1.27)
	Weighted median	8	0.103	0.069	0.132	1.11(0.97,1.27)
	Maximum likelihood	8	0.076	0.051	0.137	1.08(0.98,1.19)
	MR-PRESSO	8	0.075	0.049	0.170701	1.08(0.98,1.19)
Monocyte	IVW	356	-0.016	0.039	0.671	0.98(0.91,1.06)	0.948	0.063	222.797
	MR Egger	356	0.084	0.066	0.207	1.09(0.95,1.24)
	Weighted median	356	0.11	0.064	0.086	1.12(0.98,1.27)
	Maximum likelihood	356	-0.016	0.039	0.673	0.98(0.91,1.06)
	MR-PRESSO	356	-0.016	0.036	0.651334	0.98(0.92,1.06)
Abbreviations: CI, confidence interval; Het, heterogeneity; IVW, inverse variance weighted; MR, Mendelian randomization; MR-PRESSO, MR Pleiotropy RESidual Sum and Outlier; OR, odds ratio; Pleio, pleiotropy; SNP, single nucleotide polymorphism.

## Sheet: S6
Table s6. Effect estimates of causal associations after excluding influential or outlier SNPs for significant results.
Trait	Method	nSNP	Beta	Se	pval	OR, 95%CI	Het pval	Pleio pval	F-statistic
Natural Killer T	IVW	11	0.081	0.039	0.036	1.08(1.01,1.17)	0.995	0.687	49.0001
	MR Egger	11	0.046	0.093	0.628	1.05(0.87,1.26)
	Weighted median	11	0.084	0.049	0.09	1.09(0.99,1.2)
	Maximum likelihood	11	0.081	0.039	0.037	1.08(1.01,1.17)
	MR-PRESSO	11	0.081	0.018	0.00111692	1.08(1.05,1.12)
Neutrophil	IVW	290	0.112	0.053	0.034	1.12(1.01,1.24)	1	0.417	125.228
	MR Egger	290	0.031	0.112	0.783	1.03(0.83,1.29)
	Weighted median	290	0.056	0.087	0.519	1.06(0.89,1.26)
	Maximum likelihood	290	0.113	0.053	0.032	1.12(1.01,1.24)
	MR-PRESSO	290	0.112	0.045	0.0126863	1.12(1.02,1.22)
Abbreviations: CI, confidence interval; Het, heterogeneity; IVW, inverse variance weighted; MR, Mendelian randomization; MR-PRESSO, MR Pleiotropy RESidual Sum and Outlier; OR, odds ratio; Pleio, pleiotropy; SNP, single nucleotide polymorphism.

## Sheet: S7
Table s7. Effect estimates of causal associations between circulating immune cells and chronic periodontitis in subgroup analysis.
Trait	Method	nSNP	Beta	Se	pval	OR, 95%CI	Het pval	Pleio pval	F-statistic
B cell	IVW	7	0.109	0.047	0.019	1.11(1.02,1.22)	0.397	0.169	32.4865
	MR Egger	7	0.026	0.069	0.722	1.03(0.90,1.17)
	Weighted median	7	0.08	0.061	0.19	1.08(0.96,1.22)
	Maximum likelihood	7	0.113	0.049	0.021	1.12(1.02,1.23)
	MR-PRESSO	7	0.109	0.047	0.0579847	1.11(1.02,1.22)
Basophil	IVW	134	0.023	0.086	0.789	1.02(0.86,1.21)	0.336	0.583	130.706
	MR Egger	134	-0.049	0.157	0.756	0.95(0.70,1.29)
	Weighted median	134	-0.02	0.139	0.886	0.98(0.75,1.29)
	Maximum likelihood	134	0.023	0.084	0.782	1.02(0.87,1.21)
	MR-PRESSO	134	0.023	0.086	0.789376	1.02(0.86,1.21)
CD4+ Regulatory T	IVW	12	-0.026	0.037	0.481	0.97(0.91,1.05)	0.318	0.746	28.0115
	MR Egger	12	-0.043	0.064	0.514	0.96(0.84,1.09)
	Weighted median	12	-0.027	0.046	0.552	0.97(0.89,1.07)
	Maximum likelihood	12	-0.026	0.035	0.452	0.97(0.91,1.04)
	MR-PRESSO	12	-0.026	0.037	0.495254	0.97(0.91,1.05)
CD4+ T cell	IVW	12	-0.051	0.028	0.067	0.95(0.90,1.00)	0.45	0.346	33.272
	MR Egger	12	-0.074	0.036	0.068	0.93(0.87,1.00)
	Weighted median	12	-0.061	0.039	0.123	0.94(0.87,1.02)
	Maximum likelihood	12	-0.051	0.028	0.071	0.95(0.90,1.00)
	MR-PRESSO	12	-0.051	0.028	0.0933915	0.95(0.90,1.00)
CD8+ T cell	IVW	8	-0.115	0.075	0.124	0.89(0.77,1.03)	0.094	0.508	46.87
	MR Egger	8	0.158	0.396	0.703	1.17(0.54,2.55)
	Weighted median	8	-0.092	0.077	0.232	0.91(0.78,1.06)
	Maximum likelihood	8	-0.118	0.058	0.04	0.89(0.79,0.99)
	MR-PRESSO	8	-0.115	0.075	0.167693	0.89(0.77,1.03)
Dendritic Cell	IVW	8	-0.021	0.047	0.651	0.98(0.89,1.07)	0.812	0.332	94.0274
	MR Egger	8	0.047	0.081	0.578	1.05(0.90,1.23)
	Weighted median	8	-0.007	0.052	0.897	0.99(0.90,1.10)
	Maximum likelihood	8	-0.022	0.047	0.65	0.98(0.89,1.07)
	MR-PRESSO	8	-0.021	0.034	0.554168	0.98(0.91,1.05)
Eosinophil	IVW	311	-0.023	0.055	0.674	0.98(0.88,1.09)	0.199	0.699	170.856
	MR Egger	311	-0.06	0.11	0.586	0.94(0.76,1.17)
	Weighted median	311	-0.021	0.087	0.806	0.98(0.83,1.16)
	Maximum likelihood	311	-0.023	0.053	0.665	0.98(0.88,1.08)
	MR-PRESSO	311	-0.023	0.055	0.674511	0.98(0.88,1.09)
Lymphocyte	IVW	367	0.039	0.056	0.481	1.04(0.93,1.16)	0.142	0.545	136.764
	MR Egger	367	-0.025	0.12	0.836	0.98(0.77,1.23)
	Weighted median	367	0.026	0.096	0.788	1.03(0.85,1.24)
	Maximum likelihood	367	0.039	0.054	0.466	1.04(0.94,1.16)
	MR-PRESSO	367	0.039	0.056	0.48162	1.04(0.93,1.16)
Memory B cell	IVW	9	0.016	0.025	0.525	1.02(0.97,1.07)	0.032	0.778458	30.9013
	MR Egger	9	0.012	0.03	0.708	1.01(0.95,1.07)
	Weighted median	9	0.011	0.019	0.556	1.01(0.97,1.05)
	Maximum likelihood	9	0.016	0.018	0.371	1.02(0.98,1.05)
	MR-PRESSO	9	0.016	0.025	0.543047	1.02(0.97,1.07)
	Radial MR*	8	0.02	0.023	0.374	1.02(0.98,1.07)	0.104	0.132	29.7085
Monocyte	IVW	378	0.004	0.043	0.93	1.00(0.92,1.09)	0.292	0.035	218.159
	MR Egger	378	-0.112	0.07	0.108	0.89(0.78,1.02)
	Weighted median	378	0.008	0.075	0.91	1.01(0.87,1.17)
	Maximum likelihood	378	0.004	0.042	0.929	1.00(0.92,1.09)
	MR-PRESSO	378	0.004	0.043	0.930285	1.00(0.92,1.09)
	Radial MR*	359	-0.021	0.043	0.635	0.98(0.90,1.07)	0.999	0.235	218.604
Myeloid DC	IVW	10	0.031	0.042	0.453	1.03(0.95,1.12)	0.576	0.861	108.11
	MR Egger	10	0.042	0.07	0.569	1.04(0.91,1.20)
	Weighted median	10	0.024	0.049	0.622	1.02(0.93,1.13)
	Maximum likelihood	10	0.032	0.042	0.449	1.03(0.95,1.12)
	MR-PRESSO	10	0.031	0.038	0.434473	1.03(0.96,1.11)
Natural Killer	IVW	4	-0.074	0.067	0.266	0.93(0.81,1.06)	0.405	0.703	47.9869
	MR Egger	4	-0.013	0.158	0.94	0.99(0.72,1.35)
	Weighted median	4	-0.07	0.082	0.393	0.93(0.79,1.09)
	Maximum likelihood	4	-0.075	0.067	0.266	0.93(0.81,1.06)
	MR-PRESSO	4	-0.074	0.066	0.340994	0.93(0.82,1.06)
Natural Killer T	IVW	12	0.057	0.043	0.187	1.06(0.97,1.15)	0.564	0.447	48.7908
	MR Egger	12	-0.013	0.098	0.898	0.99(0.81,1.20)
	Weighted median	12	0.057	0.06	0.337	1.06(0.94,1.19)
	Maximum likelihood	12	0.059	0.044	0.18	1.06(0.97,1.16)
	MR-PRESSO	12	0.057	0.04	0.185965	1.06(0.98,1.15)
Neutrophil	IVW	306	-0.055	0.067	0.407	0.95(0.83,1.08)	0.004	0.103	127.005
	MR Egger	306	0.145	0.139	0.299	1.16(0.88,1.52)
	Weighted median	306	-0.03	0.103	0.772	0.97(0.79,1.19)
	Maximum likelihood	306	-0.055	0.061	0.36	0.95(0.84,1.07)
	MR-PRESSO	306	-0.055	0.067	0.407892	0.95(0.83,1.08)
	Radial MR*	284	-0.079	0.062	0.203	0.92(0.82,1.04)	0.986	0.053	128.891
Plasmacytoid DC	IVW	5	-0.083	0.038	0.031	0.92(0.85,0.99)	0.773	0.903	33.9811
	MR Egger	5	-0.079	0.051	0.223	0.92(0.84,1.02)
	Weighted median	5	-0.079	0.047	0.088	0.92(0.84,1.01)
	Maximum likelihood	5	-0.084	0.041	0.041	0.92(0.85,1.00)
	MR-PRESSO	5	-0.083	0.026	0.0320706	0.92(0.88,0.97)
T cell	IVW	11	0.038	0.058	0.515	1.04(0.93,1.16)	0.131	0.858	36.537
	MR Egger	11	0.061	0.137	0.669	1.06(0.81,1.39)
	Weighted median	11	0.047	0.068	0.494	1.05(0.92,1.20)
	Maximum likelihood	11	0.041	0.049	0.406	1.04(0.95,1.15)
	MR-PRESSO	11	0.038	0.058	0.529666	1.04(0.93,1.16)
White blood cell	IVW	365	0.023	0.061	0.71	1.02(0.91,1.15)	0.001	0.145	130.14
	MR Egger	365	0.184	0.126	0.146	1.20(0.94,1.54)
	Weighted median	365	0.076	0.095	0.426	1.08(0.90,1.30)
	Maximum likelihood	365	0.023	0.055	0.676	1.02(0.92,1.14)
	MR-PRESSO	365	0.023	0.061	0.71057	1.02(0.91,1.15)
	Radial MR*	340	-0.004	0.056	0.944	1.00(0.89,1.11)	0.947	0.278	131.81
Abbreviations: CI, confidence interval; DC, dendritic cell; Het, heterogeneity; IVW, inverse variance weighted; MR, Mendelian randomization; MR-PRESSO, MR Pleiotropy RESidual Sum and Outlier; OR, odds ratio; Pleio, pleiotropy; SNP, single nucleotide polymorphism.
Note: *When significant heterogeneity or pleiotropy was detected in the results, the Radial MR will be run to remove outlier SNPs, and the IVW test will be repeated.

## Sheet: S8
Table s8. Effect estimates of causal associations between circulating immune cells and chronic gingivitis in subgroup analysis.
Trait	Method	nSNP	Beta	Se	pval	OR, 95%CI	Het pval	Pleio pval	F-statistic
B cell	IVW	6	-0.116638	0.106863	0.275063	0.89(0.72,1.10)	0.759	0.941	32.9319
	MR Egger	6	-0.107422	0.159084	0.536538	0.90(0.66,1.23)
	Weighted median	6	-0.108388	0.128697	0.399678	0.90(0.70,1.15)
	Maximum likelihood	6	-0.117386	0.107941	0.276819	0.89(0.72,1.10)
	MR-PRESSO	6	-0.117	0.077	0.191858	0.89(0.76,1.04)
Basophil	IVW	129	-0.0425606	0.219972	0.846582	0.96(0.62,1.47)	0.015	0.131	130.825
	MR Egger	129	0.451892	0.392305	0.25153	1.57(0.73,3.39)
	Weighted median	129	0.233184	0.353172	0.509089	1.26(0.63,2.52)
	Maximum likelihood	129	-0.0427357	0.1947	0.826264	0.96(0.65,1.40)
	MR-PRESSO	129	-0.043	0.22	0.846888	0.96(0.62,1.47)
	Radial MR*	122	0.000418515	0.197462	0.998309	1.00(0.68,1.47)	0.524	0.094	131.996
CD4+ Regulatory T	IVW	10	-0.04813	0.0926213	0.603312	0.95(0.79,1.14)	0.245	0.822	27.975
	MR Egger	10	-0.0190392	0.158925	0.907595	0.98(0.72,1.34)
	Weighted median	10	-0.0550289	0.105623	0.602373	0.95(0.77,1.16)
	Maximum likelihood	10	-0.0479172	0.0826945	0.562287	0.95(0.81,1.12)
	MR-PRESSO	10	-0.048	0.093	0.61585	0.95(0.79,1.14)
CD4+ T cell	IVW	10	0.186049	0.0808389	0.0213646	1.20(1.03,1.41)	0.135	0.286	30.4901
	MR Egger	10	0.119653	0.098421	0.258743	1.13(0.93,1.37)
	Weighted median	10	0.175909	0.0844918	0.037346	1.19(1.01,1.41)
	Maximum likelihood	10	0.23247	0.102881	0.0238463	1.26(1.03,1.54)
	MR-PRESSO	10	0.186	0.081	0.0468858	1.20(1.03,1.41)
CD8+ T cell	IVW	5	0.0624019	0.25128	0.803874	1.06(0.65,1.74)	0.081	0.822	36.6169
	MR Egger	5	-0.242197	1.27734	0.861718	0.78(0.06,9.60)
	Weighted median	5	0.0919096	0.206639	0.656476	1.10(0.73,1.64)
	Maximum likelihood	5	0.0639176	0.176452	0.717174	1.07(0.75,1.51)
	MR-PRESSO	5	0.062	0.251	0.816103	1.06(0.65,1.74)
Dendritic Cell	IVW	9	0.0421278	0.110171	0.702175	1.04(0.84,1.29)	0.361	0.12	88.4141
	MR Egger	9	-0.211098	0.177508	0.273121	0.81(0.57,1.15)
	Weighted median	9	-0.071486	0.124147	0.564737	0.93(0.73,1.19)
	Maximum likelihood	9	0.0421869	0.106084	0.690871	1.04(0.85,1.28)
	MR-PRESSO	9	0.042	0.11	0.712133	1.04(0.84,1.29)
Eosinophil	IVW	304	-0.00412484	0.124859	0.973646	1.00(0.78,1.27)	0.766	0.851	162.534
	MR Egger	304	0.0366479	0.250154	0.883623	1.04(0.64,1.69)
	Weighted median	304	-0.0646151	0.204431	0.751947	0.94(0.63,1.4)
	Maximum likelihood	304	-0.00412484	0.125309	0.97374	1.00(0.78,1.27)
	MR-PRESSO	304	-0.004	0.121	0.972842	1.00(0.79,1.26)
Lymphocyte	IVW	357	-0.0456661	0.133012	0.731355	0.96(0.74,1.24)	0.076	0.024	130.752
	MR Egger	357	0.538488	0.289332	0.0635509	1.71(0.97,3.02)
	Weighted median	357	-0.0996345	0.201062	0.620219	0.91(0.61,1.34)
	Maximum likelihood	357	-0.0458175	0.126865	0.717985	0.96(0.74,1.22)
	MR-PRESSO	357	-0.046	0.133	0.731558	0.96(0.74,1.24)
	Radial MR*	333	-0.126631	0.130045	0.33018	0.88(0.68,1.14)	0.999	0.006	131.46
Memory B cell	IVW	8	-0.0230144	0.0409307	0.573927	0.98(0.90,1.06)	0.359	0.948	30.9851
	MR Egger	8	-0.0246174	0.0499938	0.639928	0.98(0.88,1.08)
	Weighted median	8	-0.0334456	0.0440282	0.447469	0.97(0.89,1.05)
	Maximum likelihood	8	-0.0229221	0.0389146	0.555838	0.98(0.91,1.05)
	MR-PRESSO	8	-0.023	0.041	0.591469	0.98(0.90,1.06)
Monocyte	IVW	371	0.0125211	0.0970395	0.897333	1.01(0.84,1.22)	0.799	0.562	218.184
	MR Egger	371	0.0841209	0.157077	0.5926	1.09(0.80,1.48)
	Weighted median	371	0.164922	0.161666	0.307664	1.18(0.86,1.62)
	Maximum likelihood	371	0.0125211	0.0972762	0.897581	1.01(0.84,1.23)
	MR-PRESSO	371	0.013	0.094	0.894082	1.01(0.84,1.22)
Myeloid DC	IVW	10	0.0149069	0.0988921	0.880182	1.02(0.84,1.23)	0.356	0.43	108.11
	MR Egger	10	-0.0969158	0.168066	0.580033	0.91(0.65,1.26)
	Weighted median	10	-0.0501057	0.110613	0.65056	0.95(0.77,1.18)
	Maximum likelihood	10	0.0150775	0.0950781	0.873999	1.02(0.84,1.22)
	MR-PRESSO	10	0.015	0.099	0.883506	1.02(0.84,1.23)
Natural Killer	IVW	4	-0.0849735	0.206206	0.68028	0.92(0.61,1.38)	0.141	0.572	47.9869
	MR Egger	4	-0.368193	0.480317	0.523462	0.69(0.27,1.77)
	Weighted median	4	-0.253448	0.190759	0.183971	0.78(0.53,1.13)
	Maximum likelihood	4	-0.087815	0.155484	0.572219	0.92(0.68,1.24)
	MR-PRESSO	4	-0.085	0.206	0.707955	0.92(0.61,1.38)
Natural Killer T	IVW	11	-0.18537	0.135522	0.171367	0.83(0.64,1.08)	0.081	0.432	48.7608
	MR Egger	11	0.0728441	0.342573	0.836347	1.08(0.55,2.10)
	Weighted median	11	-0.149767	0.14619	0.305615	0.86(0.65,1.15)
	Maximum likelihood	11	-0.194891	0.109018	0.0738261	0.82(0.66,1.02)
	MR-PRESSO	11	-0.185	0.136	0.201317	0.83(0.64,1.08)
Neutrophil	IVW	301	0.0889267	0.138868	0.521933	1.09(0.83,1.43)	0.625	0.452	124.558
	MR Egger	301	-0.107129	0.295087	0.716829	0.90(0.50,1.60)
	Weighted median	301	-0.0708007	0.237297	0.765426	0.93(0.59,1.48)
	Maximum likelihood	301	0.0886835	0.139472	0.524872	1.09(0.83,1.44)
	MR-PRESSO	301	0.089	0.137	0.516477	1.09(0.84,1.43)
Plasmacytoid DC	IVW	4	0.103886	0.133266	0.435662	1.11(0.85,1.44)	0.067	0.945	35.2214
	MR Egger	4	0.0928445	0.216653	0.709998	1.10(0.72,1.68)
	Weighted median	4	0.111242	0.0905632	0.219321	1.12(0.94,1.33)
	MR-PRESSO	4	0.104	0.133	0.492508	1.11(0.85,1.44)
T cell	IVW	7	0.093462	0.135324	0.489783	1.10(0.84,1.43)	0.592	0.768	29.1828
	MR Egger	7	0.159757	0.252431	0.554626	1.17(0.72,1.92)
	Weighted median	7	0.084177	0.180572	0.641096	1.09(0.76,1.55)
	Maximum likelihood	7	0.0952049	0.136763	0.486347	1.10(0.84,1.44)
	MR-PRESSO	7	0.093	0.119	0.461592	1.10(0.87,1.39)
White blood cell	IVW	358	0.107135	0.132614	0.419166	1.11(0.86,1.44)	0.196	0.777	123.149
	MR Egger	358	0.0372332	0.279933	0.894262	1.04(0.60,1.80)
	Weighted median	358	-0.0806067	0.214785	0.707444	0.92(0.61,1.41)
	Maximum likelihood	358	0.106591	0.129189	0.409325	1.11(0.86,1.43)
	MR-PRESSO	358	0.107	0.133	0.419704	1.11(0.86,1.44)
Abbreviations: CI, confidence interval; DC, dendritic cell; Het, heterogeneity; IVW, inverse variance weighted; MR, Mendelian randomization; MR-PRESSO, MR Pleiotropy RESidual Sum and Outlier; OR, odds ratio; Pleio, pleiotropy; SNP, single nucleotide polymorphism.
Note: *When significant heterogeneity or pleiotropy was detected in the results, the Radial MR will be run to remove outlier SNPs, and the IVW test will be repeated.

## Sheet: S9
Table s9. Effect estimates of causal associations between circulating immune cells and gingival hyperplasia in subgroup analysis.
Trait	Method	nSNP	Beta	Se	pval	OR, 95%CI	Het pval	Pleio pval	F-statistic
B cell	IVW	7	0.327	0.155	0.036	1.39(1.02,1.88)	0.876	0.666	32.4865
	MR Egger	7	0.246	0.235	0.343	1.28(0.81,2.03)
	Weighted median	7	0.299	0.196	0.127	1.35(0.92,1.98)
	Maximum likelihood	7	0.329	0.16	0.04	1.39(1.02,1.90)
	MR-PRESSO	7	0.327	0.099	0.0164412	1.39(1.14,1.68)
Basophil	IVW	134	-0.431	0.283	0.127	0.65(0.37,1.13)	0.494	0.159	130.706
	MR Egger	134	0.171	0.51	0.738	1.19(0.44,3.23)
	Weighted median	134	0.013	0.441	0.976	1.01(0.43,2.40)
	Maximum likelihood	134	-0.435	0.284	0.126	0.65(0.37,1.13)
	MR-PRESSO	134	-0.431	0.282	0.129075	0.65(0.37,1.13)
CD4+ Regulatory T	IVW	12	0.217	0.142	0.126	1.24(0.94,1.64)	0.148	0.808	28.0115
	MR Egger	12	0.265	0.243	0.301	1.30(0.81,2.10)
	Weighted median	12	0.32	0.164	0.052	1.38(1.00,1.90)
	Maximum likelihood	12	0.221	0.116	0.057	1.25(0.99,1.56)
	MR-PRESSO	12	0.217	0.142	0.154116	1.24(0.94,1.64)
CD4+ T cell	IVW	12	-0.014	0.094	0.884	0.99(0.82,1.19)	0.985	0.662	33.272
	MR Egger	12	0.02	0.121	0.869	1.02(0.81,1.29)
	Weighted median	12	-0.004	0.117	0.971	1.00(0.79,1.25)
	Maximum likelihood	12	-0.014	0.094	0.883	0.99(0.82,1.19)
	MR-PRESSO	12	-0.014	0.052	0.796354	0.99(0.89,1.09)
CD8+ T cell	IVW	8	0.141	0.28	0.614	1.15(0.67,1.99)	0.034	0.119	46.87
	MR Egger	8	2.349	1.239	0.107	10.47(0.92,118.85)
	Weighted median	8	0.281	0.255	0.27	1.32(0.80,2.18)
	Maximum likelihood	8	0.148	0.195	0.447	1.16(0.79,1.70)
	MR-PRESSO	8	0.141	0.28	0.629234	1.15(0.67,1.99)
	Radial MR*	7	-0.031	0.198	0.877	0.97(0.66,1.43)	0.439	0.16	43.0215
Dendritic Cell	IVW	8	-0.12	0.19	0.528	0.89(0.61,1.29)	0.185	0.978	94.0274
	MR Egger	8	-0.112	0.348	0.759	0.89(0.45,1.77)
	Weighted median	8	-0.055	0.185	0.767	0.95(0.66,1.36)
	Maximum likelihood	8	-0.122	0.16	0.445	0.89(0.65,1.21)
	MR-PRESSO	8	-0.12	0.19	0.547942	0.89(0.61,1.29)
Eosinophil	IVW	311	-0.114	0.18	0.526	0.89(0.63,1.27)	0.618	0.977	170.856
	MR Egger	311	-0.123	0.362	0.734	0.88(0.43,1.80)
	Weighted median	311	-0.143	0.289	0.621	0.87(0.49,1.53)
	Maximum likelihood	311	-0.115	0.181	0.522	0.89(0.63,1.27)
	MR-PRESSO	311	-0.114	0.178	0.520607	0.89(0.63,1.26)
Lymphocyte	IVW	367	-0.348	0.183	0.057	0.71(0.49,1.01)	0.459	0.073	136.764
	MR Egger	367	-0.968	0.389	0.013	0.38(0.18,0.81)
	Weighted median	367	-0.423	0.334	0.205	0.66(0.34,1.26)
	Maximum likelihood	367	-0.348	0.183	0.057	0.71(0.49,1.01)
	MR-PRESSO	367	-0.348	0.183	0.0575103	0.71(0.49,1.01)
Memory B cell	IVW	9	-0.025	0.058	0.669	0.98(0.87,1.09)	0.605	0.258	30.9013
	MR Egger	9	-0.063	0.066	0.371	0.94(0.83,1.07)
	Weighted median	9	-0.048	0.063	0.446	0.95(0.84,1.08)
	Maximum likelihood	9	-0.025	0.058	0.668	0.98(0.87,1.09)
	MR-PRESSO	9	-0.025	0.052	0.645363	0.98(0.88,1.08)
Monocyte	IVW	378	-0.149	0.143	0.298	0.86(0.65,1.14)	0.896	0.892	218.159
	MR Egger	378	-0.174	0.232	0.454	0.84(0.53,1.32)
	Weighted median	378	-0.259	0.245	0.291	0.77(0.48,1.25)
	Maximum likelihood	378	-0.149	0.144	0.3	0.86(0.65,1.14)
	MR-PRESSO	378	-0.149	0.137	0.276166	0.86(0.66,1.13)
Myeloid DC	IVW	10	-0.126	0.176	0.471	0.88(0.62,1.24)	0.117	0.815	108.11
	MR Egger	10	-0.067	0.309	0.835	0.94(0.51,1.72)
	Weighted median	10	-0.085	0.16	0.593	0.92(0.67,1.26)
	Maximum likelihood	10	-0.128	0.141	0.364	0.88(0.67,1.16)
	MR-PRESSO	10	-0.126	0.176	0.489468	0.88(0.62,1.24)
Natural Killer	IVW	4	0.36	0.261	0.168	1.43(0.86,2.39)	0.266	0.242	47.9869
	MR Egger	4	-0.319	0.471	0.568	0.73(0.29,1.83)
	Weighted median	4	0.367	0.3	0.221	1.44(0.80,2.60)
	Maximum likelihood	4	0.373	0.235	0.113	1.45(0.92,2.30)
	MR-PRESSO	4	0.36	0.261	0.26144	1.43(0.86,2.39)
Natural Killer T	IVW	12	-0.08	0.145	0.58	0.92(0.69,1.23)	0.501	0.341	48.7908
	MR Egger	12	-0.377	0.331	0.281	0.69(0.36,1.31)
	Weighted median	12	0.095	0.192	0.621	1.10(0.75,1.60)
	Maximum likelihood	12	-0.082	0.147	0.576	0.92(0.69,1.23)
	MR-PRESSO	12	-0.08	0.141	0.579313	0.92(0.70,1.22)
Neutrophil	IVW	306	0.309	0.212	0.146	1.36(0.90,2.07)	0.138	0.902	127.005
	MR Egger	306	0.357	0.444	0.423	1.43(0.60,3.41)
	Weighted median	306	0.307	0.34	0.366	1.36(0.70,2.65)
	Maximum likelihood	306	0.308	0.205	0.132	1.36(0.91,2.03)
	MR-PRESSO	306	0.309	0.212	0.147018	1.36(0.90,2.07)
Plasmacytoid DC	IVW	5	-0.057	0.128	0.657	0.94(0.74,1.21)	0.697	0.891	33.9811
	MR Egger	5	-0.073	0.17	0.695	0.93(0.67,1.30)
	Weighted median	5	-0.08	0.149	0.59	0.92(0.69,1.24)
	Maximum likelihood	5	-0.057	0.128	0.657	0.94(0.74,1.21)
	MR-PRESSO	5	-0.057	0.095	0.582805	0.94(0.78,1.14)
T cell	IVW	11	0.082	0.2	0.681	1.09(0.73,1.61)	0.113	0.397	36.537
	MR Egger	11	-0.277	0.452	0.555	0.76(0.31,1.84)
	Weighted median	11	-0.187	0.217	0.388	0.83(0.54,1.27)
	Maximum likelihood	11	0.086	0.164	0.599	1.09(0.79,1.50)
	MR-PRESSO	11	0.082	0.2	0.689549	1.09(0.73,1.61)
White blood cell	IVW	365	-0.003	0.186	0.988	1.00(0.69,1.44)	0.433	0.855	130.14
	MR Egger	365	0.058	0.383	0.879	1.06(0.50,2.25)
	Weighted median	365	0.004	0.309	0.989	1.00(0.55,1.84)
	Maximum likelihood	365	-0.003	0.186	0.987	1.00(0.69,1.43)
	MR-PRESSO	365	-0.003	0.186	0.987522	1.00(0.69,1.44)
Abbreviations: CI, confidence interval; DC, dendritic cell; Het, heterogeneity; IVW, inverse variance weighted; MR, Mendelian randomization; MR-PRESSO, MR Pleiotropy RESidual Sum and Outlier; OR, odds ratio; Pleio, pleiotropy; SNP, single nucleotide polymorphism.
Note: *When significant heterogeneity or pleiotropy was detected in the results, the RadialMR will be run to remove outlier SNPs, and the IVW test will be repeated.

[truncated: 7 more sheets: S10, S11, S12, S13, S14, S15, S16]
